# Supplementary material for: A good use of time? Providing evidence for how effort is invested in primary and secondary outcome data collection in trials
Source: Trials. 2022 Dec 27;23:1047. doi: 10.1186/s13063-022-06973-8 (PMC9793601; doi:10.1186/s13063-022-06973-8)
Supplement: Supplementary file 2 — Additional file 2. [file 13063_2022_6973_MOESM2_ESM.xls]

## Sheet: Export - Table 1
Trial Forge: summary of all trials
Note:	1. There are 120 Phase III trials, 21 Core outcome set trials and 20 Public health trials.
	2. Trials in red are trials where it was not possible to get one or more of Time to collect for primary and secondary outcomes, data on times measured or numbers randomised.
	3. We obtained full Time to collect data for 100 Phase III trials, 17 Core outcome trials and 17 Public health trials.
Phase 3 trials
Trial ID	Title of trial	Clinical discipline	Country	Year	Pubmed ID (if available)	Number of participants randomised	Notes
41	Foldable vs rigid lenses after phacoemulsification for cataract surgery: a randomised controlled trial	Other	Nepal	2014	24556879	1200
42	Motivational counseling to reduce sitting time: a community-based randomized controlled trial in adults	Lifestyle and addiction	Denmark	2014	25113139	166
43	Assessment of the adjuvant effect of tacrolimus in the management of pemphigus vulgaris: A randomized controlled trial	Infection and immunity	Iran	2014	24552352	46
44	Impact of age of first exposure to Plasmodium falciparum on antibody responses to malaria in children: a randomized, controlled trial in Mozambique	Infection and immunity	Mozambique	2014	24674654	349
45	A Cluster Randomized-Controlled Trial of a Classroom-Based Drama Workshop Program to Improve Mental Health Outcomes among Immigrant and Refugee Youth in Special Classes	Mental health	Canada	2014	25127251	555
46	Effects of bayberry juice on inflammatory and apoptotic markers in young adults with features of non-alcoholic fatty liver disease	Gastrointestinal	China	2014	24377455	44	No secondary Time to collect data
47	Robotic Resistance/Assistance Training Improves Locomotor Function in Individuals Poststroke: A Randomized Controlled Study	Cardiovascular	USA	2014	24440365	30
48	Resistance to Erythropoiesis Stimulating Agents in Patients Treated with Online Hemodiafiltration and Ultrapure Low-Flux Hemodialysis: Results from a Randomized Controlled Trial (CONTRAST)	Gastrointestinal	The Netherlands	2014	24743493	714
49	A Text Message Alcohol Intervention for Young Adult Emergency Department Patients: A Randomized Clinical Trial	Lifestyle and addiction	USA	2014	25017822	765	Obtained timing data but secondary Time to collect = 0 so did not contribute to ratio calculations
50	Multidisciplinary Group Clinic Appointments: The Self-Management and Care of Heart Failure (SMAC-HF) Trial	Cardiovascular	USA	2014	25236883	198
51	Platelet-rich plasma injections for the treatment of hamstring injuries: a randomized controlled trial	Musculoskeletal	Malaysia	2014	25073598	28
52	Influence of counseling sessions on the prevalence of breastfeeding in the first year of life: a randomized clinical trial with adolescent mothers and grandmothers	Women and children	Brazil	2014	24654636	323
53	Diet and physical exercise in psoriasis: a randomized controlled trial	Dermatology	Italy	2014	24641585	303
54	Online CBT for preschool anxiety disorders: a randomised control trial	Mental health	Australia	2014	24927471	52
55	Family-based psychosocial support and education as part of pulmonary rehabilitation in COPD: a randomized controlled trial	Respiratory	Portugal	2014	25340477	56
56	Increasing varenicline dose in smokers who do not respond to the standard dosage: a randomized clinical trial	Lifestyle and addiction	UK	2014	25545858	200
57	Modafinil increases the latency of response in the Hayling Sentence Completion Test in healthy volunteers: a randomised controlled trial	Neurology	UK	2014	25391155	64
58	A randomized phase III study comparing pegylated liposomal doxorubicin with capecitabine as first-line chemotherapy in elderly patients with metastatic breast cancer: results of the OMEGA study of the Dutch Breast Cancer Research Group BOOG	Cancer	The Netherlands	2014	24504445	78
59	Transforaminal versus intra-articular facet corticosteroid injections for the treatment of cervical radiculopathy: a randomized, double-blind, controlled study	Neurology	Canada	2014	24874533	56
60	Simvastatin as a novel therapeutic agent for venous ulcers: a randomized, double-blind, placebo-controlled trial	Gastrointestinal	Philippines	2014	24506834	66
61	Prevention of conversion to abnormal TCD with hydroxyurea in sickle cell anemia: a phase III international randomized clinical trial	Other	USA	2015	26414435	22
62	Effect of supplemental oxygen 80% on post-tonsillectomy nausea and vomiting: a randomized controlled trial	Other	Iran	2015	26677853	102	No primary or secondary Time to collect data
63	Interactive cognitive-motor step training improves cognitive risk factors of falling in older adults – a randomized controlled trial	Other	Australia	2015	26673919	90
64	Tilt table therapies for patients with severe disorders of consciousness: a randomized, controlled trial	Neurology	Germany	2015	26623651	50
65	Evaluation of sit-stand workstations in an office setting: a randomised controlled trial	Lifestyle and addiction	UK	2015	26584856	47
66	Continuous positive airway pressure with helmet versus mask in infants with bronchiolitis: An RCT	Respiratory	Italy	2015	25780074	30
67	Ultra-low-dose buprenorphine as a time-limited treatment for severe suicidal ideation: A randomized controlled trial	Mental health	Israel	2015	26684923	88
68	Radiofrequency versus ethanol ablation for treating predominantly cystic thyroid nodules: A randomized clinical trial	Endocrinology	Korea	2015	26576124	50
69	Folic acid causes higher prevalence of detectable unmetabolized folic acid in serum than B-complex: A randomized clinical trial	Nutrition	Germany	2015	25943647	58
70	Early intervention and child physical health: Evidence from a Dublin-based randomized controlled trial	Lifestyle and addiction	Ireland	2015	26439756	233
71	Early sustained unresponsiveness after short-course egg oral immunotherapy: a randomized controlled study in egg-allergic children	Infection and immunity	Spain	2015	26236997	61
72	Diagnostic performance of the Bernese versus Ottawa ankle rules: Results of a randomised controlled trial	Musculoskeletal	The Netherlands	2015	25933807	203
73	Circuit class therapy or seven-day week therapy for increasing rehabilitation intensity of therapy after stroke (CIRCIT): a randomized controlled trial	Cardiovascular	Australia	2015	25790018	283
74	Implementation of a surgical safety checklist and postoperative outcomes: a prospective randomized controlled study	Other	India	2015	25691114	700
75	Oxybutynin as a treatment for generalized hyperhidrosis: a randomized, placebo-controlled trial	Dermatology	France	2015	26114588	62
76	Benefits of partnered strength training for prostate cancer survivors and spouses: results from a randomized controlled trial of the Exercising Together project	Cancer	USA	2015	26715587	64
77	Calcium and vitamin D supplementation do not influence menopause-related symptoms: Results of the Women’s Health Initiative Trial	Women and children	USA	2015	26044075	23020
78	Resveratrol improves treatment outcome and laboratory parameters in patients with Takayasu arteritis: A randomized double-blind and placebo-controlled trial	Cardiovascular	China	2016	27771172	242
79	Tai Chi Exercise for Cancer-Related Fatigue in Patients With Lung Cancer Undergoing Chemotherapy: A Randomized Controlled Trial	Cancer	China	2016	26721747	96	Obtained timing data but secondary Time to collect = 0 so did not contribute to ratio calculations
80	Comparison of active vs. expectant management of the third stage of labor in women with low risk of postpartum hemorrhage: a randomized controlled trial	Women and children	Turkey	2016	27304659	669
81	Efficacy of Cognitive-Behavioral Therapy for Insomnia Combined With Antidepressant Pharmacotherapy in Patients With Comorbid Depression and Insomnia: A Randomized Controlled Trial	Neurology	USA	2016	27788313	150
82	Perinatal and Hemodynamic Evaluation of Sildenafil Citrate for Preeclampsia Treatment	Women and children	Brazil	2016	27400005	100	No primary or secondary Time to collect data
83	Effect of Continuous Positive Airway Pressure on Cardiovascular Biomarkers: The Sleep Apnea Stress Randomized Controlled Trial	Neurology	USA	2016	26997243	153
84	Is dextrose prolotherapy superior to placebo for the treatment of temporomandibular joint hypermobility? A randomized clinical trial	Musculoskeletal	Turkey	2016	26846795	30
85	Should Asymptomatic Bacteriuria Be Systematically Treated in Kidney Transplant Recipients? Results From a Randomized Controlled Trial	Other	Spain	2016	27088545	112
86	Is there an effect of intranasal insulin on development and behaviour in Phelan-McDermid syndrome? A randomized, double-blind, placebo-controlled trial	Other	The Netherlands	2016	27577546	25
87	Effects of Housing First on Employment and Income of Homeless Individuals: Results of a Randomized Trial	Lifestyle and addiction	Canada	2016	26876657	2148
88	Refeeding low weight hospitalized adolescents with anorexia nervosa: a multicenter randomized controlled trial	Mental health	UK	2016	26869609	36
89	Sustained-release dexamfetamine in the treatment of chronic cocaine-dependent patients on heroin-assisted treatment: a randomised, double-blind, placebo-controlled trial	Lifestyle and addiction	The Netherlands	2016	27015909	73
90	Immediate versus delayed invasive intervention for non-STEMI patients: The RIDDLE-NSTEMI Study	Cardiovascular	Serbia	2016	26777321	323
91	Effects of interventions on use of hearing protectors among farm operators: A randomized controlled trial	Other	USA	2016	26766172	491	No primary or secondary Time to collect data
92	Belotecan/cisplatin versus etoposide/cisplatin in previously untreated patients with extensive-stage small cell lung carcinoma: a multi-center randomized phase III trial	Cancer	Korea	2016	27566413	157
93	Duration of antibiotic treatment in community-acquired pneumonia: A multicenter randomized clinical trial	Respiratory	Spain	2016	12226033	312
94	Seven-day intensive preoperative rehabilitation for elderly patients with lung cancer: a randomized controlled trial	Cancer	China	2016	28032568	60
95	Effect of soy in men with type 2 diabetes mellitus and subclinical hypogonadism: A randomized controlled study	Endocrinology	UK	2016	27797674	200
96	Supported telemonitoring and glycemic control in people with type 2 diabetes: The telescot diabetes pragmatic multicenter randomized controlled trial	Endocrinology	UK	2016	27458809	321
97	A process evaluation of the supermarket healthy eating for life (SHELf) randomized controlled trial	Nutrition	Australia	2016	26912177	642	No secondary Time to collect data
98	Behavioral weight loss intervention for migraine: A randomized controlled trial	Neurology	USA	2017	29178659	110
99	Clinic and home-based behavioral intervention for obesity in pre-schoolers: A randomized trial	Lifestyle and addiction	USA	2017	29150147	167
100	Effects of clay art therapy on adults outpatients with major depressive disorder: A randomized controlled trial	Mental health	Hong Kong	2017	28433887	106
101	Effectiveness of irrigation with chlorhexidine after removal of mandibular third molars: A randomised controlled trial	Other	Australia	2017	29223633	100
102	The effects of multi-disciplinary psycho-social care on socio-economic problems in cancer patients: A cluster-randomized trial	Cancer	Germany	2017	29270828	1012
103	Clinical effects of a pharmacist intervention in acute wards: A randomized controlled trial	Other	Denmark	2017	28457021	498
104	Effects of methylprednisolone on the duration of rocuronium-induced neuromuscular block	Other	China	2017	28953616	116	No primary or secondary Time to collect data
105	Reducing trunk compensation in stroke survivors: A randomized crossover trial comparing visual and force feedback modalities	Cardiovascular	Canada	2017	28526482	15
106	Effect of Erythropoietin in patients with acute myocardial infarction: five-year results of the REVIVAL-3 trial	Cardiovascular	Germany	2017	28109258	138
107	Does azithromycin given to women in labour decrease ocular bacterial infection in neonates? A double-blind, randomized trial	Women and children	Gambia	2017	29282015	829
108	Comparison of 3D laparoscopic gastrectomy with a 2D procedure for gastric cancer: A phase 3 randomized controlled trial	Cancer	China	2017	29195739	438
109	Sutureless vs sutured gastroschisis closure: A prospective randomized controlled trial	Women and children	USA	2017	28279777	39	No primary Time to collect data
110	Application of zone model predictive control artificial pancreas during extended use of infusion set and sensor: A randomized crossover-controlled home-use trial	Endocrinology	USA	2017	28584075	19	No primary Time to collect data
111	Effect of myofascial techniques for treatment of persistent arm pain after breast cancer treatment: Randomized controlled trial	Cancer	Belgium	2017	28914087	50
112	Multidomain lifestyle intervention benefits a large elderly population at risk for cognitive decline and dementia regardless of baseline characteristics: The FINGER trial	Neurology	Finland	2017	29055814	1260
113	Mercaptopurine versus placebo to prevent recurrence of Crohn’s disease after surgical resection (TOPPIC): A multicentre, double-blind randomised controlled trial	Gastrointestinal	UK	2017	28404197	240
114	Work-focused cognitive behavioural intervention for psychological complaints in patients on sick leave due to work-related stress: Results from a randomized controlled trial	Mental health	Denmark	2017	28830555	163
115	Efficacy of guided self-help behavioural activation and physical acivity for depression: A randomized controlled trial	Mental health	Canada	2017	28644740	59
116	Effect of educational package on lifestyle of primiparous mothers during postpartum period: A randomized controlled clinical trial	Women and children	Iran	2017	28931169	220	No secondary Time to collect data
117	Acupressure, sleep, and quality of life in institutionalized older adults: A randomized controlled clinical trial	Neurology	Taiwan	2017	28152177	62
118	The acute effects of dietary carbohydrate reduction on postprandial responses of non-esterified fatty acids and triglycerides: a randomized trial	Endocrinology	Denmark	2018	30591062	16	No secondary Time to collect data
119	Repetitive TMS to augment cognitive processing therapy in combat veterans of recent conflicts with PTSD: A randomized clinical trial	Mental health	USA	2018	29351885	103
120	Minimally invasive versus abdominal radical hysterectomy for cervical cancer	Cancer	USA	2018	30380365	631
121	Classroom-based physical activity improves children’s math achievement – A randomized controlled trial	Women and children	Denmark	2018	30557397	505
122	Effect of a low-intensity PSA-based screening based intervention on prostate cancer mortality: The CAP randomized clinical trial	Cancer	UK	2018	29509864	415357	Obtained timing data but primary Time to collect = 0 so did not contribute to ratio calculations
123	Prophylaxis of postoperative nausea and vomiting after cardiac surgery in high-risk patients: A randomized controlled study	Other	France	2018	29336385	502
124	Effects of long-term norfloxacin therapy in patients with advanced cirrhosis	Gastrointestinal	France	2018	30144431	291
125	Cervical ripening balloon with and without oxytocin in multiparas: A randomized controlled trial	Women and children	USA	2018	29763609	195
126	Self-tracking of physical activity in people with type 2 diabetes	Endocrinology	The Netherlands	2018	29742550	72
127	An 18-mo randomized, double-blind, placebo-controlled trial of DHA-rich fish oil to prevent age-related cognitive decline in cognitively normal older adults	Neurology	Australia	2018	29722833	403
128	Effects of a combined physical and psychosocial training for children with cancer: A randomized controlled trial	Cancer	The Netherlands	2018	30587148	59
129	Comparing effects of 4 months of two self-administered exercise training programs on physical performance in patients with chronic kidney disease: RENEXC – A randomized controlled trial	Gastrointestinal	Sweden	2018	30571753	151	No secondary Time to collect data
130	Thrombus aspiration in late presenters with ST-elevation myocardial infarction: A single-center randomized trial	Cardiovascular	Egypt	2018	29869443	60	No secondary Time to collect data
131	Low-level laser therapy (830nm) on orthodontic pain: blinded randomized clinical trial	Other	Brazil	2018	29998356	62	No secondary Time to collect data
132	Managing risk of non-communicable diseases in women with bulimia nervosa or binge eating disorders: A randomized trial with 12 months follow-up	Mental health	Norway	2018	30513892	164
133	Communication-based interventions for increasing influenza vaccination rates among Aboriginal children: A randomised controlled trial	Infection and immunity	Australia	2018	30279091	5534
134	Garlic extract favourably modifies markers of endothelial function in obese patients – randomized double blind placebo-controlled nutritional intervention	Lifestyle and addiction	Poland	2018	29604599	92
135	Bag-Mask Ventilation during Tracheal Intubation of Critically Ill Adults	Respiratory	United States	2019	30779528	401
136	Design of the SHAPE-2 study: the effect of physical activity, in addition to weight loss, on biomarkers of postmenopausal breast cancer risk	Nutrition	The Netherlands	2019	23972905	243
137	Satisfactory analgesia with minimal emesis in day surgeries: a randomised controlled trial of morphine versus hydromorphone	Neurology	Canada	2019	31027915	402
138	Effects of home reading training on reading and quality of life in AMD-a randomized and controlled study	Other	Germany	2019	31111250	37
139	Nocturnal temperature-controlled laminar airflow device for adults with severe allergic asthma: the LASER RCT	Respiratory	UK	2019	31232684	240	No primary Time to collect data
140	A randomized trial of trigger point dry needling versus sham needling for chronic tension-type headache	Other	Turkey	2019	30813155	161
141	Cost-effectiveness and quality of life of a diet intervention postpartum: 2-year results from a randomized controlled trial	Nutrition	Sweden	2019	30621673	110
142	Discontinuing cotrimoxazole preventive therapy in HIV-infected adults who are stable on antiretroviral treatment in Uganda (COSTOP): A randomised placebo-controlled trial	Infection and immunity	Uganda	2019	30596666	2180
143	Goal-oriented cognitive rehabilitation for early-stage Alzheimer's and related dementias: the GREAT RCT	Neurology	UK	2019	30879470	475
144	Lung protective ventilation during pulmonary resection in children: a prospective, single-centre, randomised controlled trial	Respiratory	South Korea	2019	30916035	114
145	Cuff-assisted versus cap-assisted colonoscopy for adenoma detection: results of a randomized study	Gastrointestinal	Spain	2019	31096275	711
146	Selective laser trabeculoplasty versus drops for newly diagnosed ocular hypertension and glaucoma: the LiGHT RCT	Other	UK	2019	31264958	718
147	Inflammatory markers response to citrulline supplementation in patients with non-alcoholic fatty liver disease: a randomized, double blind, placebo-controlled, clinical trial	Gastrointestinal	Iran	2019	30767788	50
148	Effect of manual physiotherapy in homogeneous individuals with subacromial shoulder impingement: A randomized controlled trial	Musculoskeletal	Australia	2019	30680850	69
149	Adjuvant Chemotherapy plus Radiation for Locally Advanced Endometrial Cancer	Cancer	USA	2019	31189035	736
150	Procalcitonin-Guided Treatment on Duration of Antibiotic Therapy and Cost in Septic Patients (PRODA): a Multi-Center Randomized Controlled Trial	Infection and immunity	South Korea	2019	30977312	52
151	Levothyroxine in Women with Thyroid Peroxidase Antibodies before Conception	Women and children	UK	2019	30907987	952
152	Pre-pregnancy and early pregnancy calcium supplementation among women at high risk of pre-eclampsia: a multicentre, double-blind, randomised, placebo-controlled trial	Women and children	Zimbabwe, South Africa, Argentina	2019	30696573	1355
153	White Sweet Potato as Meal Replacement for Overweight White-Collar Workers: A Randomized Controlled Trial	Nutrition	Taiwan	2019	30646532	60
154	Group singing improves depression and life quality in patients with stable COPD: a randomized community-based trial in China	Mental health	China	2019	30612266	60
155	Intralesional mycobacterium w vaccine versus cryotherapy in treatment of refractory extragenital warts: a randomized, open-label, comparative study	Dermatology	India	2015	26553733	66	No primary or secondary Time to collect data
156	The effect of omega-3 fatty acids in patients with active rheumatoid arthritis receiving DMARDs therapy: Double-blind randomized controlled trial	Rheumatoid arthritis	Iran	2015	26925896	60	No primary or secondary Time to collect data
157	The effect of three different ad libitum diets for weight loss maintenance: a randomized 18-month trial	Nutrition	Denmark	2015	26659070	125	No primary or secondary Time to collect data
158	Effect of fentanyl nasal packing treatment on patients with acute postoperative pain after nasal operation: A randomized double-blind controlled trial	Neurology	South Korea	2018	29519133	152	No primary or secondary Time to collect data
159	Effectiveness of aspiration or deroofing for blister management in patients with burns	Dermatology	South Korea	2018	29703044	47	No primary or secondary Time to collect data
160	The effects of neck mobilization in patients with chronic neck pain: A randomized controlled trial	Neurology	Pakistan	2018	29332752	68	No primary or secondary Time to collect data
Core outcome set trials
Trial ID	Title of trial	Clinical discipline	Country	Year	Pubmed ID (if available)	Number of participants randomised	Notes
4	Methotrexate and Cyclosporine in Treatment of Early Rheumatoid Arthritis	Rheumatoid arthritis	Denmark	2006	16645967	160	No secondary Time to collect data
5	Direct comparison of treatment responses, remission rates, and drug adherence in patients with rheumatoid arthritis treated with adalimumab, etanercept, or infliximab: results from 8 years of surveillance of clinical practice in the DANBIO registry.	Rheumatoid arthritis	Denmark	2010	20039405	112	Obtained timing data but primary Time to collect = 0 so did not contribute to ratio calculations
6	Effects of Atorvastatin on Disease Activity and HDL Cholesterol Function in Patients With Rheumatoid Arthritis	Rheumatoid arthritis	USA	2007	17552046	20
7	A Comparison of Methotrexate Alone or Combined to Infliximab or to Pulse Methylprednisolone in Early Rheumatoid Arthritis: A Magnetic Resonance Imaging Study	Rheumatoid arthritis	Belgium	2007	18050189	44
8	Treatment of Rheumatoid Arthritis With Roxithromycin: a randomized trial	Rheumatoid arthritis	Turkey	2011	21904105	100	No primary or secondary Time to collect data
9	Treatment of Early RA: Minocycline in Combination With Methotrexate vs Methotrexate Alone	Rheumatoid arthritis	USA			91
10	Efficacy and Safety of Etanercept in Active RA Despite Methotrexate Therapy in Japan (JESMR)	Rheumatoid arthritis	Japan	2010	20574649	151	No primary or secondary Time to collect data
11	Comparison of MTX+ anti-TNF to MTX+ conventional DMARDs in patients with early rheumatoid arthritis who failed MTX alone	Rheumatoid arthritis	Sweden	2011	21149498	487
12	Switching Anti-TNF-Alpha Agents in Rheumatoid Arthritis (RA)	Rheumatoid arthritis	USA			13
30	TNF-blocking Therapy in Combination With Disease-modifying Antirheumatic Drugs in Early Rheumatoid Arthritis (NEO-RACo)	Rheumatoid arthritis	Finland	2014	25274892	99
31	Success of Tocilizumab in RA Patients With Remission Induction and Sustained Efficacy After Discontinuation (SURPRISE)	Rheumatoid arthritis	Japan	2016	5099201	233
32	Spacing of TNF-blocker Injections in Rheumatoid Arthritis Study (STRASS)	Rheumatoid arthritis	France	2015	26103979	137
33	Optimal management of rheumatoid arthritis patients requiring biologic therapy (ORBIT)	Rheumatoid arthritis	UK	2016	27197690	295
34	Effectiveness in daily practice of different treatment strategies for early rheumatoid arthritis	Rheumatoid arthritis	Belgium	2017	27432356	379
35	Improvement in insulin resistance is greater when infliximab is added to methotrexate during intensive treatment of early rheumatoid arthritis-results from the IDEA study.	Rheumatoid arthritis	UK	2016	27638812	79
36	Study of Two Different Starting Doses of Methotrexate When Starting Treatment in Rheumatoid Arthritis (DMIRA)	Rheumatoid arthritis	India	2014	24976447	100
37	Study of Different Doses of Folic Acid in Combination With Methotrexate in Rheumatoid Arthritis (FOLVARI)	Rheumatoid arthritis	India	2015	26063325	100
38	Leflunomide Versus Sulfasalazine/Methotrexate in Rheumatoid Arthritis:an Ultrasound/Magnetic Resonance Imaging Study	Rheumatoid Arthritis	Singapore			1
39	RA Denosumab on bone microstructure study	Rheumatoid Arthritis	Hong Kong			40
40	Comparison of Three Different Treatment Regimes in Early Rheumatoid Arthritis: A Randomized Open-labelled Trial	Rheumatoid Arthritis	India			60	No primary or secondary Time to collect data
161	Combination Treatment With Methotrexate, Cyclosporine, and Intraarticular Betamethasone Compared With Methotrexate and Intraarticular Betamethasone in Early Active Rheumatoid Arthritis Early Active Rheumatoid Arthritis	Rheumatoid Arthritis	Denmark	2006	16645967	160
Public health trials
Trial ID	Title of trial	Clinical discipline	Country	Year	Pubmed ID (if available)	Number of participants randomised	Notes
1	PRENACEL - a mHealth messaging system to complement antenatal care: a cluster randomized trial	Women and children	Brazil	2017	29116028	1210
2	Effects of web-based stress and depression literacy intervention on improving symptoms and knowledge of depression among workers: A randomized controlled trial	Mental health	Japan	2016	27280960	1236
3	Theory-based modifications of an advanced notification letter improves screening for bowel cancer in men: A randomised controlled trial	Cancer	Australia	2016	27485727	9216
13	A randomized, controlled trial to increase discussion of breast cancer in primary care	Cancer	USA	2014	24762560	1635
14	Effectiveness of an action-oriented educational intervention in ensuring long term improvement of knowledge, attitudes and practices of community health workers in maternal and infant health: a randomized controlled study	Women and children	Brazil	2018	30261868	59	No secondary Time to collect data
15	Metabolic syndrome from adolescence to early adulthood: effect of infancy-onset dietary counseling of low saturated fat: the Special Turku Coronary Risk Factor Intervention Project (STRIP)	Nutrition	Finland	2015	25605660	1062
16	Effectiveness of a group diabetes education programme in under-served communities in South Africa: a pragmatic cluster randomized controlled trial	Endocrinology	South Africa	2014	24766179	1570
17	Improving feeding and growth of HIV-positive children through nutrition training of frontline health workers in Tanga, Tanzania	Nutrition	Tanzania	2017	28376725	776
18	Family-centered brief intervention for reducing obesity and cardiovascular disease risk: A randomized controlled trial	Nutrition	New Zealand	2016	27616217	320
19	Effectiveness of a walking programme to support adults with intellectual disabilities to increase physical activity: walk well cluster-randomised controlled trial.	Lifestyle and addiction	UK	2015	26416606	102
20	Intervention of childhood and adolescents obesity in Shantou city	Nutrition	China	2015	25596004	41
21	A block randomized controlled trial of a brief smoking cessation counselling and advice through short message service on participants who joined the Quit to Win Contest in Hong Kong	Lifestyle and addiction	Hong Kong	2015	26116584	1003
22	Brief report: A randomized controlled trial examining peer support and behavioral weight loss treatment	Nutrition	USA	2015	26265590	41
23	A computerized kiosk to teach injury prevention: is it as effective as human interaction?	Lifestyle and addiction	USA	2014	25153050	357	No primary or secondary Time to collect data
24	Self-Expansion is Associated with Better Adherence and Obesity Treatment Outcomes in Adults	Nutrition	USA	2017	27436226	268
25	The Effectiveness of a Web-Based Computer-Tailored Intervention on Workplace Sitting: A Randomized Controlled Trial	Lifestyle and addiction	Belgium	2016	27245789	213
26	Effects of Awareness Material on Suicide-Related Knowledge and the Intention to Provide Adequate Help to Suicidal Individuals	Mental health	Germany	2018	28793816	273
27	A Computerized Lifestyle Application to Promote Multiple Health Behaviors at the Workplace: Testing Its Behavioral and Psychological Effects	Lifestyle and addiction	Germany	2015	26429115	560
28	The effect of test kit provision, and individual and family education on the uptake rates of fecal occult blood test in an Asian population: a randomized controlled trial	Cancer	Singapore	2014	25088807	343	No secondary Time to collect data
29	Motivational interviewing and self-determination theory in a web-based computer tailored physical activity intervention: A randomized controlled trial	Lifestyle and addiction	The Netherlands	2016	26849996	4302
