# Supplementary material for: A good use of time? Providing evidence for how effort is invested in primary and secondary outcome data collection in trials
Source: Trials. 2022 Dec 27;23:1047. doi: 10.1186/s13063-022-06973-8 (PMC9793601; doi:10.1186/s13063-022-06973-8)
Supplement: Supplementary file 4 — Additional file 4. [file 13063_2022_6973_MOESM4_ESM.xlsx]

## Sheet: Times for secondaries
Trial Forge: Time to collect for secondary outcomes
Note:	1. These are the secondary outcomes for which we obtained a Time to collect, meaning the total is 612 rather than 688 for the 161 trials as a whole.
	2. Where a trial appears more than once this is because it has more than one secondary outcome.
Phase 3 trials
Trial ID	Title of trial	Broad disease area	Pubmed ID (if available)	Number of participants randomised	Secondary outcome	Secondary outcome measurement instrument	Number of times measured	Time to collect (mins)	Total secondary outcome Time to collect for trial (mins)	Total secondary outcome Time to collect for trial (hours)
41	Foldable vs rigid lenses after phacoemulsification for cataract surgery: a randomised controlled trial	Eye disease	25656879	1200	Visual acuity at other time points	Snellen E chart at 6m	2	3	7200	120
41	Foldable vs rigid lenses after phacoemulsification for cataract surgery: a randomised controlled trial	Eye disease	25656879	1200	Complications during surgery	Chart review	1	3	3600	60
41	Foldable vs rigid lenses after phacoemulsification for cataract surgery: a randomised controlled trial	Eye disease	25656879	1200	Early post-operative complications	Chart review	2	3	7200	120
41	Foldable vs rigid lenses after phacoemulsification for cataract surgery: a randomised controlled trial	Eye disease	25656879	1200	Long term complications	Chart review	1	3	3600	60
41	Foldable vs rigid lenses after phacoemulsification for cataract surgery: a randomised controlled trial	Eye disease	25656879	1200	Astigmatism	Measured using a keratometer	2	5	12000	200
41	Foldable vs rigid lenses after phacoemulsification for cataract surgery: a randomised controlled trial	Eye disease	25656879	1200	Cost	Costs of lenses and also surgeon time - chart review	1	6	7200	120
42	Motivational counseling to reduce sitting time: a community-based randomized controlled trial in adults	Physical activity	25113139	166	Sitting time at work an during leisure on an average weekday	Self-reported using a questionnaire - the Physical Activity Scale (PAS) 2.1, 2 specific questions that were part of a large questionnaire	2	2	664	11.0667
42	Motivational counseling to reduce sitting time: a community-based randomized controlled trial in adults	Physical activity	25113139	166	Height	Height	2	1.5	498	8.3
42	Motivational counseling to reduce sitting time: a community-based randomized controlled trial in adults	Physical activity	25113139	166	Weight	Weight	2	1.5	498	8.3
42	Motivational counseling to reduce sitting time: a community-based randomized controlled trial in adults	Physical activity	25113139	166	Waist circumference	Waist circumference	2	1.5	498	8.3
42	Motivational counseling to reduce sitting time: a community-based randomized controlled trial in adults	Physical activity	25113139	166	Cardiometabolic biomarkers	Venous blood sample	2	3	996	16.6
43	Assessment of the adjuvant effect of tacrolimus in the management of pemphigus vulgaris: A randomized controlled trial	Autoimmune diseases	24552352	46	Remission of the disease	Pemphigus activity score	6	3	828	13.8
44	Impact of age of first exposure to Plasmodium falciparum on antibody responses to malaria in children: a randomized, controlled trial in Mozambique	Malaria	24574654	349	Time to first or only episode of malaria, anaemia and other clinical endpoints	Global comparison between the 3 study groups of the time to first or only episode of clinical malaria (according to the secondary case definitions) in the second year of follow up detected by passive case detection. Other endpoints include multiple episod	1	10	3490	58.1667
44	Impact of age of first exposure to Plasmodium falciparum on antibody responses to malaria in children: a randomized, controlled trial in Mozambique	Malaria	24574654	349	Oxidative stress markers	Blood draw	5	3.5	6107.5	101.792
44	Impact of age of first exposure to Plasmodium falciparum on antibody responses to malaria in children: a randomized, controlled trial in Mozambique	Malaria	24574654	349	Humoral and cellular immune responses	Blood draw	5	3.5	6107.5	101.792
44	Impact of age of first exposure to Plasmodium falciparum on antibody responses to malaria in children: a randomized, controlled trial in Mozambique	Malaria	24574654	349	Host genetics	Blood draw	1	7.5	2617.5	43.625
45	A Cluster Randomized-Controlled Trial of a Classroom-Based Drama Workshop Program to Improve Mental Health Outcomes among Immigrant and Refugee Youth in Special Classes	Learning disabilities	25127251	555	Emotional and behavioural symptoms	SDQ global scores (teacher and youth reports), and impairment assessed by teachers (impact supplement)	3	5	8325	138.75
45	A Cluster Randomized-Controlled Trial of a Classroom-Based Drama Workshop Program to Improve Mental Health Outcomes among Immigrant and Refugee Youth in Special Classes	Learning disabilities	25127251	555	School performance	First (November) and last (June) report cards of the school year	2	5	5550	92.5
47	Robotic Resistance/Assistance Training Improves Locomotor Function in Individuals Poststroke: A Randomized Controlled Study	Stroke	24440365	30	Balance	Berg Balance Scale (BBS) and Activities-specific Balance Confidence (ABC) scale	3	25	2250	37.5
47	Robotic Resistance/Assistance Training Improves Locomotor Function in Individuals Poststroke: A Randomized Controlled Study	Stroke	24440365	30	Muscle tone/spasticity	Modified Ashworth Scale (0-4)	3	13.75	1237.5	20.625
47	Robotic Resistance/Assistance Training Improves Locomotor Function in Individuals Poststroke: A Randomized Controlled Study	Stroke	24440365	30	Quality of life	Medical Outcomes Study 36-Item Short-Form Health Survey	3	8.75	787.5	13.125
48	Resistance to Erythropoiesis Stimulating Agents in Patients Treated with Online Hemodiafiltration and Ultrapure Low-Flux Hemodialysis: Results from a Randomized Controlled Trial (CONTRAST)	Kidney disease	24743493	714	Fatal and non-fatal cardiovascular events	Chart review	1	3	2142	35.7
48	Resistance to Erythropoiesis Stimulating Agents in Patients Treated with Online Hemodiafiltration and Ultrapure Low-Flux Hemodialysis: Results from a Randomized Controlled Trial (CONTRAST)	Kidney disease	24743493	714	Left ventricular mass index (LVMi), carotid IMT (intima media thickness), aortic pulse wave velocity (PWV)	Echocardiography	8	40	228480	3808
48	Resistance to Erythropoiesis Stimulating Agents in Patients Treated with Online Hemodiafiltration and Ultrapure Low-Flux Hemodialysis: Results from a Randomized Controlled Trial (CONTRAST)	Kidney disease	24743493	714	Laboratory markers of endothelial dysfunction, micro-inflammation, oxidative stress	Blood draw	8	3.5	19992	333.2
48	Resistance to Erythropoiesis Stimulating Agents in Patients Treated with Online Hemodiafiltration and Ultrapure Low-Flux Hemodialysis: Results from a Randomized Controlled Trial (CONTRAST)	Kidney disease	24743493	714	Lipid profiles, uremic toxins	Blood draw	28	3.5	69972	1166.2
48	Resistance to Erythropoiesis Stimulating Agents in Patients Treated with Online Hemodiafiltration and Ultrapure Low-Flux Hemodialysis: Results from a Randomized Controlled Trial (CONTRAST)	Kidney disease	24743493	714	Quality of life	Kidney Disease Quality of Life Short Form (KDQOL-SF)	8	25	142800	2380
48	Resistance to Erythropoiesis Stimulating Agents in Patients Treated with Online Hemodiafiltration and Ultrapure Low-Flux Hemodialysis: Results from a Randomized Controlled Trial (CONTRAST)	Kidney disease	24743493	714	Nutritional state	Subjective global assessment (SGA), pre-albumin and dry weight	4	17.5	49980	833
48	Resistance to Erythropoiesis Stimulating Agents in Patients Treated with Online Hemodiafiltration and Ultrapure Low-Flux Hemodialysis: Results from a Randomized Controlled Trial (CONTRAST)	Kidney disease	24743493	714	Anemia management	Blood draw	28	3.5	69972	1166.2
48	Resistance to Erythropoiesis Stimulating Agents in Patients Treated with Online Hemodiafiltration and Ultrapure Low-Flux Hemodialysis: Results from a Randomized Controlled Trial (CONTRAST)	Kidney disease	24743493	714	Hospital admissions	Hospital admission for any cause - chart review	1	3	2142	35.7
48	Resistance to Erythropoiesis Stimulating Agents in Patients Treated with Online Hemodiafiltration and Ultrapure Low-Flux Hemodialysis: Results from a Randomized Controlled Trial (CONTRAST)	Kidney disease	24743493	714	Blood pressure and hypertensive medication	Blood pressure cuff, self-report medication use	28	5	99960	1666
48	Resistance to Erythropoiesis Stimulating Agents in Patients Treated with Online Hemodiafiltration and Ultrapure Low-Flux Hemodialysis: Results from a Randomized Controlled Trial (CONTRAST)	Kidney disease	24743493	714	Residual kidney function	Ultrasound scan	8	30	171360	2856
48	Resistance to Erythropoiesis Stimulating Agents in Patients Treated with Online Hemodiafiltration and Ultrapure Low-Flux Hemodialysis: Results from a Randomized Controlled Trial (CONTRAST)	Kidney disease	24743493	714	Mineral bone disease parameters and medication	Blood draw	1	3.5	2499	41.65
49	A Text Message Alcohol Intervention for Young Adult Emergency Department Patients: A Randomized Clinical Trial	Alcohol consumption	25017822	765	Proportion of participants with weekend binge episodes and most drinks consumed per drinking occasion over 12 weekends	Based on primary outcomes	0	1	0	0
50	Multidisciplinary Group Clinic Appointments: The Self-Management and Care of Heart Failure (SMAC-HF) Trial	Heart failure	25236883	198	Heart failure self management	Questionnaire	5	3	2970	49.5
50	Multidisciplinary Group Clinic Appointments: The Self-Management and Care of Heart Failure (SMAC-HF) Trial	Heart failure	25236883	198	Heart failure knowledge and preparedness for home care	Questionnaire	5	3	2970	49.5
50	Multidisciplinary Group Clinic Appointments: The Self-Management and Care of Heart Failure (SMAC-HF) Trial	Heart failure	25236883	198	Functional health status	Kansas City Cardiomyopathy Questionnaire score (KCCQ)	5	3	2970	49.5
50	Multidisciplinary Group Clinic Appointments: The Self-Management and Care of Heart Failure (SMAC-HF) Trial	Heart failure	25236883	198	Quality of life	Depressive symptoms assessed by the Center for Epidemiological Studies Depression Scale (CES-D)	5	3	2970	49.5
50	Multidisciplinary Group Clinic Appointments: The Self-Management and Care of Heart Failure (SMAC-HF) Trial	Heart failure	25236883	198	Satisfaction with health care	5 point Likert scale ranging from 1 = not helpful, to 5 = very helpful	5	3	2970	49.5
50	Multidisciplinary Group Clinic Appointments: The Self-Management and Care of Heart Failure (SMAC-HF) Trial	Heart failure	25236883	198	Health services use	Questionnaire	5	3	2970	49.5
51	Platelet-rich plasma injections for the treatment of hamstring injuries: a randomized controlled trial	Muscle injury	25073598	28	Changes in pain severity and intensity	BPI-SF self reported questionnaire (9 questions) (severity questions 2-6, and intensity questions 9A-9G)	17	10	4760	79.3333
52	Influence of counseling sessions on the prevalence of breastfeeding in the first year of life: a randomized clinical trial with adolescent mothers and grandmothers	Breastfeeding	24654636	323	Pattern of complementary feeding	Telephone interview	9	7.5	21802.5	363.375
53	Diet and physical exercise in psoriasis: a randomized controlled trial	Psoriasis	24641585	303	Reduction in extent of psoriasis	PASI score reduction of ≥ 50% (PASI 50), ≥ 75% (PASI 75) and = 100% (PASI 100)	4	3	3636	60.6
53	Diet and physical exercise in psoriasis: a randomized controlled trial	Psoriasis	24641585	303	Reduction in patient's weight and waist circumference	Weight and waist measurement	4	5	6060	101
54	Online CBT for preschool anxiety disorders: a randomised control trial	Anxiety	24927471	52	Child anxiety	Preschool anxiety scale (PAS)	3	10	1560	26
54	Online CBT for preschool anxiety disorders: a randomised control trial	Anxiety	24927471	52	Internalising behaviour	Child Behaviour Checklist (1.5-5 years) - Internalising Subscale (CBCL-Int)	3	5	780	13
54	Online CBT for preschool anxiety disorders: a randomised control trial	Anxiety	24927471	52	Parental treatment satisfaction	8-item questionnaire designed specifically to measure satisfaction with the online program	1	5	260	4.33333
54	Online CBT for preschool anxiety disorders: a randomised control trial	Anxiety	24927471	52	Parental depression, anxiety and stress	Depression, Anxiety and Stress Scale (DASS-21)	3	10	1560	26
54	Online CBT for preschool anxiety disorders: a randomised control trial	Anxiety	24927471	52	Parenting style	Egna Minnen Betraffande Uppfostran (EMBU-P)	3	30	4680	78
54	Online CBT for preschool anxiety disorders: a randomised control trial	Anxiety	24927471	52	Therapy compliance measures	Computer generated - number of sessions completed, frequency of sessions, number and quality of completed homework assignments, number and quality of session activities completed, time spent on sessions	8	0	0	0
55	Family-based psychosocial support and education as part of pulmonary rehabilitation in COPD: a randomized controlled trial	Lung disease	25340477	56	Change in psychosocial adjustment to the disease	Psychosocial Adjustment to Illness Scale-Self report (PAIS-SR)	4	20	4480	74.6667
55	Family-based psychosocial support and education as part of pulmonary rehabilitation in COPD: a randomized controlled trial	Lung disease	25340477	56	Change in psychological well-being	Depression, anxiety and stress scales	4	10	2240	37.3333
55	Family-based psychosocial support and education as part of pulmonary rehabilitation in COPD: a randomized controlled trial	Lung disease	25340477	56	Change in caregiving difficulties (for family members only)	Carers Assessment of Difficulties Index (CADI)	4	20	4480	74.6667
55	Family-based psychosocial support and education as part of pulmonary rehabilitation in COPD: a randomized controlled trial	Lung disease	25340477	56	Patients and family members' perspectives of the Family-based PR program	Semi-structured focus group interviews	1	52.5	2940	49
56	Increasing varenicline dose in smokers who do not respond to the standard dosage: a randomized clinical trial	Smoking cessation	25545858	200	Number of people with no effect of varenicline prior to the target quit date	Self-reported questionnaire	1	5	1000	16.6667
56	Increasing varenicline dose in smokers who do not respond to the standard dosage: a randomized clinical trial	Smoking cessation	25545858	200	Change in withdrawal symptoms	Mood and physical symptoms scale	4	4	3200	53.3333
56	Increasing varenicline dose in smokers who do not respond to the standard dosage: a randomized clinical trial	Smoking cessation	25545858	200	Validated abstinence rate	Validated abstinence rate	4	4	3200	53.3333
56	Increasing varenicline dose in smokers who do not respond to the standard dosage: a randomized clinical trial	Smoking cessation	25545858	200	Profile of all adverse effects	Self-reported questionnaire	4	4	3200	53.3333
56	Increasing varenicline dose in smokers who do not respond to the standard dosage: a randomized clinical trial	Smoking cessation	25545858	200	Client ratings of tailored treatment regimen	Self-reported questionnaire	4	4	3200	53.3333
56	Increasing varenicline dose in smokers who do not respond to the standard dosage: a randomized clinical trial	Smoking cessation	25545858	200	Rating of urges to smoke	Rating of urges to smoke 24 hours post target quit date	4	2	1600	26.6667
57	Modafinil increases the latency of response in the Hayling Sentence Completion Test in healthy volunteers: a randomised controlled trial	Cognitive performance	25391155	64	Physiological measures	Blood pressure and pulse measurements	5	10	3200	53.3333
58	A randomized phase III study comparing pegylated liposomal doxorubicin with capecitabine as first-line chemotherapy in elderly patients with metastatic breast cancer: results of the OMEGA study of the Dutch Breast Cancer Research Group BOOG	Oncology	24504445	78	Quality of life	EORTC Quality of Life Questionnaire C-30	3	10	2340	39
59	Transforaminal versus intra-articular facet corticosteroid injections for the treatment of cervical radiculopathy: a randomized, double-blind, controlled study	Neurological damage	24874533	56	Impact of neck pain on every day life activities	Neck Disability Index (NDI)	2	10	1120	18.6667
59	Transforaminal versus intra-articular facet corticosteroid injections for the treatment of cervical radiculopathy: a randomized, double-blind, controlled study	Neurological damage	24874533	56	Medication use on a weekly basis after the intervention	Medication Quantitative Scale (MQS)	4	10	2240	37.3333
60	Simvastatin as a novel therapeutic agent for venous ulcers: a randomized, double-blind, placebo-controlled trial	Ulcers	24506834	66	Time to complete healing	Physical evaluation by a dermatologist	4.3075	0	0	0
60	Simvastatin as a novel therapeutic agent for venous ulcers: a randomized, double-blind, placebo-controlled trial	Ulcers	24506834	66	Percentage of surface area healed	Manual planimetry	4.3075	25	7107.38	118.456
60	Simvastatin as a novel therapeutic agent for venous ulcers: a randomized, double-blind, placebo-controlled trial	Ulcers	24506834	66	Effects on lipid and liver profiles	Blood draw	4.3075	3.5	995.033	16.5839
60	Simvastatin as a novel therapeutic agent for venous ulcers: a randomized, double-blind, placebo-controlled trial	Ulcers	24506834	66	Quality of life	Dermatology Life Quality Index (DLQI)	4.3075	2	568.59	9.4765
60	Simvastatin as a novel therapeutic agent for venous ulcers: a randomized, double-blind, placebo-controlled trial	Ulcers	24506834	66	Incidence of adverse effects	Chart review	4.3075	3	852.885	14.2148
61	Prevention of conversion to abnormal TCD with hydroxyurea in sickle cell anemia: a phase III international randomized clinical trial	Genetic disease	26414435	22	Serial TCD velocities	TCD exam	30	35	23100	385
61	Prevention of conversion to abnormal TCD with hydroxyurea in sickle cell anemia: a phase III international randomized clinical trial	Genetic disease	26414435	22	Cumulative incidence of neurological events	Chart review	30	20	13200	220
61	Prevention of conversion to abnormal TCD with hydroxyurea in sickle cell anemia: a phase III international randomized clinical trial	Genetic disease	26414435	22	Cululative incidence of non-neurological events	Chart review	30	20	13200	220
61	Prevention of conversion to abnormal TCD with hydroxyurea in sickle cell anemia: a phase III international randomized clinical trial	Genetic disease	26414435	22	Health related quality of life	Questionnaires	30	25	16500	275
63	Interactive cognitive-motor step training improves cognitive risk factors of falling in older adults – a randomized controlled trial	Falls	26673919	90	Concern about falling	Icon-FES	3	5	1350	22.5
63	Interactive cognitive-motor step training improves cognitive risk factors of falling in older adults – a randomized controlled trial	Falls	26673919	90	Depressive symptoms	9 item Patient Health Questionnaire (PHQ-9)	3	5	1350	22.5
63	Interactive cognitive-motor step training improves cognitive risk factors of falling in older adults – a randomized controlled trial	Falls	26673919	90	Cognitive function	The trailmaking test, the digit symbol test, the attentional network test, the Stroop task, a mental rotation task	3	25	6750	112.5
63	Interactive cognitive-motor step training improves cognitive risk factors of falling in older adults – a randomized controlled trial	Falls	26673919	90	Function mobility	Timed up and go test (TUG) and the sit-to-stand test	3	4	1080	18
63	Interactive cognitive-motor step training improves cognitive risk factors of falling in older adults – a randomized controlled trial	Falls	26673919	90	Reaction time	Choice stepping reaction time (CSRT)	3	3	810	13.5
63	Interactive cognitive-motor step training improves cognitive risk factors of falling in older adults – a randomized controlled trial	Falls	26673919	90	Reactive stepping responses	Push and release test	3	5	1350	22.5
63	Interactive cognitive-motor step training improves cognitive risk factors of falling in older adults – a randomized controlled trial	Falls	26673919	90	Monthly falls	Fall calendar	6	10	5400	90
64	Tilt table therapies for patients with severe disorders of consciousness: a randomized, controlled trial	Consciousness	26623651	50	Improvement in heart rate variability	Heart rate variability measurement	3	12.5	1875	31.25
64	Tilt table therapies for patients with severe disorders of consciousness: a randomized, controlled trial	Consciousness	26623651	50	Muscle tone/spasticity	Modified Tardieu/Ashworth scale	3	22.5	3375	56.25
64	Tilt table therapies for patients with severe disorders of consciousness: a randomized, controlled trial	Consciousness	26623651	50	Blood pressure, heart rate, oxygen saturation	Sensors	3	5	750	12.5
64	Tilt table therapies for patients with severe disorders of consciousness: a randomized, controlled trial	Consciousness	26623651	50	Traumatic brain injury measure	Glasgow Outcome Score (GOS)	3	0.5	75	1.25
65	Evaluation of sit-stand workstations in an office setting: a randomised controlled trial	Physical activity	26584856	47	Change in workplace standing	Ecological momentary assessment diary	3	0	0	0
65	Evaluation of sit-stand workstations in an office setting: a randomised controlled trial	Physical activity	26584856	47	Change in workplace walking time	Ecological momentary assessment diary	3	0	0	0
65	Evaluation of sit-stand workstations in an office setting: a randomised controlled trial	Physical activity	26584856	47	Change in flow-mediated dilation (FMD)	Flow-mediated dilation technique	3	10	1410	23.5
65	Evaluation of sit-stand workstations in an office setting: a randomised controlled trial	Physical activity	26584856	47	Change in carotid intima media thickness (cIMT)	Carotid artery intima media thickness (cIMT) test	2	10	940	15.6667
65	Evaluation of sit-stand workstations in an office setting: a randomised controlled trial	Physical activity	26584856	47	Change in plasma glucose	Blood draw	2	3.5	329	5.48333
65	Evaluation of sit-stand workstations in an office setting: a randomised controlled trial	Physical activity	26584856	47	Change in triglycerides	Blood draw	2	3.5	329	5.48333
65	Evaluation of sit-stand workstations in an office setting: a randomised controlled trial	Physical activity	26584856	47	Change in total cholesterol	Blood draw	2	3.5	329	5.48333
65	Evaluation of sit-stand workstations in an office setting: a randomised controlled trial	Physical activity	26584856	47	Change in musculoskeletal discomfort or pain in the neck/shoulders	Questionnaire (adapted from a previous trial)	2	2	188	3.13333
65	Evaluation of sit-stand workstations in an office setting: a randomised controlled trial	Physical activity	26584856	47	Change in musculoskeletal discomfort or pain in the lower back	Questionnaire (adapted from a previous trial)	2	2	188	3.13333
65	Evaluation of sit-stand workstations in an office setting: a randomised controlled trial	Physical activity	26584856	47	Change in musculoskeletal discomfort or pain in the upper back	Questionnaire (adapted from a previous trial)	2	2	188	3.13333
65	Evaluation of sit-stand workstations in an office setting: a randomised controlled trial	Physical activity	26584856	47	Change in body mass index	Height and weight measurement	2	5	470	7.83333
66	Continuous positive airway pressure with helmet versus mask in infants with bronchiolitis: An RCT	Lung disease	25780074	30	Number of patients requiring sedation	Chart review	1	3	90	1.5
66	Continuous positive airway pressure with helmet versus mask in infants with bronchiolitis: An RCT	Lung disease	25780074	30	Complications with each interface	Objective pain scale (OPS) and COMFORT scale	2	10	600	10
67	Ultra-low-dose buprenorphine as a time-limited treatment for severe suicidal ideation: A randomized controlled trial	Suicidality	26684923	88	Reduction in depression	Beck Depression Inventory II and the Suicide Probability Scale and its hopelessness and worthlessness factors	4	30	10560	176
67	Ultra-low-dose buprenorphine as a time-limited treatment for severe suicidal ideation: A randomized controlled trial	Suicidality	26684923	88	Mental pain	Item 25 on the Suicide Probability Scale	4	2	704	11.7333
68	Radiofrequency versus ethanol ablation for treating predominantly cystic thyroid nodules: A randomized clinical trial	Endocrinology	26576124	50	Improvement of symptomatic score	0-10 visual analogue scale	2	3	300	5
68	Radiofrequency versus ethanol ablation for treating predominantly cystic thyroid nodules: A randomized clinical trial	Endocrinology	26576124	50	Improvement of cosmetic score	1-4 scale recorded by the physician	2	5	500	8.33333
69	Folic acid causes higher prevalence of detectable unmetabolized folic acid in serum than B-complex: A randomized clinical trial	Dietary supplements	25943647	58	Changes in concentration of metabolic biomarkers related to the folate cycle	Blood draw	2	3.5	406	6.76667
70	Early intervention and child physical health: Evidence from a Dublin-based randomized controlled trial	Quality of life	26439756	233	Birth outcomes	Maternity hospital records at birth (birth weight, gestational age, prematurity, Apgar score)	5	10	11650	194.167
70	Early intervention and child physical health: Evidence from a Dublin-based randomized controlled trial	Quality of life	26439756	233	Labour outcomes	Maternity hospital records at birth (instrumental delivery, caesarean section - elective, emergency	5	10	11650	194.167
70	Early intervention and child physical health: Evidence from a Dublin-based randomized controlled trial	Quality of life	26439756	233	Parenting skills	Adult Adolescence Parenting Inventory; Knowledge of Infant Development; Parental locus of control; Condon Maternal Attachment Scale; Parenting Stress Index; Parenting Daily Hassles Scale.; Maternal Separation Anxiety; Parental Cognitions and Conduct Towar	5	10	11650	194.167
70	Early intervention and child physical health: Evidence from a Dublin-based randomized controlled trial	Quality of life	26439756	233	Quality of the home environment	Home Observation for Measurement of the Environment scale; Activities with child; Home Learning Environment; Material Deprivation scale; Framingham Safety Survey; Family Environment Scale; Difficult Life Circumstances; Neighbourhood Quality Evaluation Sca	5	10	11650	194.167
70	Early intervention and child physical health: Evidence from a Dublin-based randomized controlled trial	Quality of life	26439756	233	Parent health	Physical health outcomes (self-reported); personality (Ten-Item Personality Inventory, Rosenberg self-esteem; Pearlin Self-Efficacy Scale; Vulnerable Attachment Style Questionnaire; Considerations of Future Consequences; Future Outlook Inventory; Self-con	5	10	11650	194.167
70	Early intervention and child physical health: Evidence from a Dublin-based randomized controlled trial	Quality of life	26439756	233	Social support and service use	Level from support from various people; community integration; use of services; partner satisfaction; Maternal Social Support Index; Family Quality of Life; Relationship Quality Index	5	10	11650	194.167
71	Early sustained unresponsiveness after short-course egg oral immunotherapy: a randomized controlled study in egg-allergic children	Allergies	26236997	61	Induction of desensitization	Patient's ability to eat at lease one undercooked egg compulsory every 48 hours during MP without adverse reactions	3	20	3660	61
71	Early sustained unresponsiveness after short-course egg oral immunotherapy: a randomized controlled study in egg-allergic children	Allergies	26236997	61	Safety	Number and severity of adverse reactions	1	30	1830	30.5
71	Early sustained unresponsiveness after short-course egg oral immunotherapy: a randomized controlled study in egg-allergic children	Allergies	26236997	61	Individual potential predictors to develop SU	Variables considered: baseline age, gender, history of asthma, history of previous anaphylaxis to egg ingestion, frequency and severity of adverse events during OIT, dose triggering symptoms in DBPCFC at baseline and EW-, OVA- and OVM-sIgE at 3 months	1	25	1525	25.4167
71	Early sustained unresponsiveness after short-course egg oral immunotherapy: a randomized controlled study in egg-allergic children	Allergies	26236997	61	Changes in the DBPCFC threshold	Observation	3	20	3660	61
71	Early sustained unresponsiveness after short-course egg oral immunotherapy: a randomized controlled study in egg-allergic children	Allergies	26236997	61	Immunological changes throughout the trial	Skin prick test	3	30	5490	91.5
72	Diagnostic performance of the Bernese versus Ottawa ankle rules: Results of a randomised controlled trial	Diagnostics	25933807	203	Accuracy of the ED residents versus the triage nurses	Diagnostic accuracy of triage nurses in interpreting both rules is compared to ED residents	1	2.5	507.5	8.45833
73	Circuit class therapy or seven-day week therapy for increasing rehabilitation intensity of therapy after stroke (CIRCIT): a randomized controlled trial	Stroke	25790018	283	Walking ability	Timed 10 metre walk and Functional Ambulation Classification	4	6	6792	113.2
73	Circuit class therapy or seven-day week therapy for increasing rehabilitation intensity of therapy after stroke (CIRCIT): a randomized controlled trial	Stroke	25790018	283	Ability to perform activities of daily living	Functional independence measure	4	37.5	42450	707.5
73	Circuit class therapy or seven-day week therapy for increasing rehabilitation intensity of therapy after stroke (CIRCIT): a randomized controlled trial	Stroke	25790018	283	Upper limb function	Wolf Motor Function test	4	35	39620	660.333
73	Circuit class therapy or seven-day week therapy for increasing rehabilitation intensity of therapy after stroke (CIRCIT): a randomized controlled trial	Stroke	25790018	283	Mobility	Stroke Impact scale (mobility section)	3	3	2547	42.45
73	Circuit class therapy or seven-day week therapy for increasing rehabilitation intensity of therapy after stroke (CIRCIT): a randomized controlled trial	Stroke	25790018	283	Quality of life	Australian quality of life instrument (5 domains)	3	5	4245	70.75
73	Circuit class therapy or seven-day week therapy for increasing rehabilitation intensity of therapy after stroke (CIRCIT): a randomized controlled trial	Stroke	25790018	283	Participant satisfaction	Hopsat questionnaire	4	10	11320	188.667
73	Circuit class therapy or seven-day week therapy for increasing rehabilitation intensity of therapy after stroke (CIRCIT): a randomized controlled trial	Stroke	25790018	283	Length of hospital stay	Number of overnight stays in the rehabilitation facility - chart review	4	3	3396	56.6
74	Implementation of a surgical safety checklist and postoperative outcomes: a prospective randomized controlled study	Surgery	25691114	700	Effects of compliance of checklist completion on post-operative outcomes	The comorbidities of a patient were recorded and further classified according to the Charlson Comorbidity Index, and postoperative complications were according to the Clavien-Dindo classification	1	60	42000	700
75	Oxybutynin as a treatment for generalized hyperhidrosis: a randomized, placebo-controlled trial	Hyperhidrosis	26114588	62	Quality of life	Dermatology Life Quality Index (DLQI)	2	5	620	10.3333
75	Oxybutynin as a treatment for generalized hyperhidrosis: a randomized, placebo-controlled trial	Hyperhidrosis	26114588	62	Safety evaluation	Numbe rof participants with adverse events	1	5	310	5.16667
76	Benefits of partnered strength training for prostate cancer survivors and spouses: results from a randomized controlled trial of the Exercising Together project	Oncology	26715587	64	Muscle strength	Maximal muscle strength	3	17.5	3360	56
76	Benefits of partnered strength training for prostate cancer survivors and spouses: results from a randomized controlled trial of the Exercising Together project	Oncology	26715587	64	Body composition	Lean and fat mass measured by DXA	3	12.5	2400	40
76	Benefits of partnered strength training for prostate cancer survivors and spouses: results from a randomized controlled trial of the Exercising Together project	Oncology	26715587	64	Number of chronic medical conditions	Charlson Cormorbidity Index	3	2	384	6.4
76	Benefits of partnered strength training for prostate cancer survivors and spouses: results from a randomized controlled trial of the Exercising Together project	Oncology	26715587	64	Moderate-vigorous intensity physical activity	CHAMPS questionnaire	3	12.5	2400	40
76	Benefits of partnered strength training for prostate cancer survivors and spouses: results from a randomized controlled trial of the Exercising Together project	Oncology	26715587	64	Adherence to the programme	Recorded daily check in at exercise classes	48	1	3072	51.2
77	Calcium and vitamin D supplementation do not influence menopause-related symptoms: Results of the Women’s Health Initiative Trial	Women's health	26044075	23020	Energy/fatigure and emotional wellbeing	Energy/fatigue and emotional wellbeing subscales of the SF-36	2	8.75	402850	6714.17
77	Calcium and vitamin D supplementation do not influence menopause-related symptoms: Results of the Women’s Health Initiative Trial	Women's health	26044075	23020	Sleep disturbance	Women's Health Initiative Insomnia Rating scale (sleep symptoms rated how often they had occurred in the previous 4 weeks - from none to 5 or more times per week)	2	4	184160	3069.33
78	Resveratrol improves treatment outcome and laboratory parameters in patients with Takayasu arteritis: A randomized double-blind and placebo-controlled trial	Cardiology	27771172	242	Laboratory parameters	Blood draw for ESR, CRP and TNF-a	7	5	8470	141.167
79	Tai Chi Exercise for Cancer-Related Fatigue in Patients With Lung Cancer Undergoing Chemotherapy: A Randomized Controlled Trial	Oncology	26721747	96	General fatigue	Score on MFSI-SF subscale	3	0	0	0
79	Tai Chi Exercise for Cancer-Related Fatigue in Patients With Lung Cancer Undergoing Chemotherapy: A Randomized Controlled Trial	Oncology	26721747	96	Physical fatigue	Score on MFSI-SF subscale	3	0	0	0
79	Tai Chi Exercise for Cancer-Related Fatigue in Patients With Lung Cancer Undergoing Chemotherapy: A Randomized Controlled Trial	Oncology	26721747	96	Emotional fatigue	Score on MFSI-SF subscale	3	0	0	0
79	Tai Chi Exercise for Cancer-Related Fatigue in Patients With Lung Cancer Undergoing Chemotherapy: A Randomized Controlled Trial	Oncology	26721747	96	Mental fatigue	Score on MFSI-SF subscale	3	0	0	0
79	Tai Chi Exercise for Cancer-Related Fatigue in Patients With Lung Cancer Undergoing Chemotherapy: A Randomized Controlled Trial	Oncology	26721747	96	Vigor	Score on MFSI-SF subscale	3	0	0	0
80	Comparison of active vs. expectant management of the third stage of labor in women with low risk of postpartum hemorrhage: a randomized controlled trial	Obstetrics	27304659	669	Changes in haemoglobin of more than 3g/dL	Blood draw	2	2	2676	44.6
80	Comparison of active vs. expectant management of the third stage of labor in women with low risk of postpartum hemorrhage: a randomized controlled trial	Obstetrics	27304659	669	Durations of third stage labour	Question - data collected before patients were discharged from hospital	1	2	1338	22.3
80	Comparison of active vs. expectant management of the third stage of labor in women with low risk of postpartum hemorrhage: a randomized controlled trial	Obstetrics	27304659	669	Need for additional uterotonic agents	Question - data collected before patients were discharged from hospital	1	2	1338	22.3
80	Comparison of active vs. expectant management of the third stage of labor in women with low risk of postpartum hemorrhage: a randomized controlled trial	Obstetrics	27304659	669	Need for blood transfusions	Question - data collected before patients were discharged from hospital	1	2	1338	22.3
80	Comparison of active vs. expectant management of the third stage of labor in women with low risk of postpartum hemorrhage: a randomized controlled trial	Obstetrics	27304659	669	Need for additional interventions e.g. manual removal of the placenta postpartum curettage	Question - data collected before patients were discharged from hospital	1	2	1338	22.3
81	Efficacy of Cognitive-Behavioral Therapy for Insomnia Combined With Antidepressant Pharmacotherapy in Patients With Comorbid Depression and Insomnia: A Randomized Controlled Trial	Sleep disorders	27788313	150	Percentage of participants in insomnia remission	Self-administered Insomnia Severity Index (ISI)	9	6	8100	135
83	Effect of Continuous Positive Airway Pressure on Cardiovascular Biomarkers: The Sleep Apnea Stress Randomized Controlled Trial	Sleep disorders	26997243	153	Mean arterial BP	Blood pressure measurement	2	45	13770	229.5
83	Effect of Continuous Positive Airway Pressure on Cardiovascular Biomarkers: The Sleep Apnea Stress Randomized Controlled Trial	Sleep disorders	26997243	153	Pulse wave velocity	Ultrasound	2	45	13770	229.5
83	Effect of Continuous Positive Airway Pressure on Cardiovascular Biomarkers: The Sleep Apnea Stress Randomized Controlled Trial	Sleep disorders	26997243	153	IL-6	Blood draw	2	4.375	1338.75	22.3125
83	Effect of Continuous Positive Airway Pressure on Cardiovascular Biomarkers: The Sleep Apnea Stress Randomized Controlled Trial	Sleep disorders	26997243	153	sIL-6R	Blood draw	2	4.375	1338.75	22.3125
84	Is dextrose prolotherapy superior to placebo for the treatment of temporomandibular joint hypermobility? A randomized clinical trial	Hypermobility	26846795	30	Masticatory efficiency	VAS Score	1	3	90	1.5
84	Is dextrose prolotherapy superior to placebo for the treatment of temporomandibular joint hypermobility? A randomized clinical trial	Hypermobility	26846795	30	Pain complaints	VAS Score	1	3	90	1.5
84	Is dextrose prolotherapy superior to placebo for the treatment of temporomandibular joint hypermobility? A randomized clinical trial	Hypermobility	26846795	30	Joint sounds	VAS Score	1	3	90	1.5
85	Should Asymptomatic Bacteriuria Be Systematically Treated in Kidney Transplant Recipients? Results From a Randomized Controlled Trial	Organ transplants	27088545	112	Incidence of lower tract urinary infections	The number of patients that develope lower tract urinary infection in the first 2 years after transplantation in each group, divided by the number of patients allocated in each group at randomization.	1	3	336	5.6
85	Should Asymptomatic Bacteriuria Be Systematically Treated in Kidney Transplant Recipients? Results From a Randomized Controlled Trial	Organ transplants	27088545	112	Acute rejection	Graft rejection - chart review	1	3	336	5.6
85	Should Asymptomatic Bacteriuria Be Systematically Treated in Kidney Transplant Recipients? Results From a Randomized Controlled Trial	Organ transplants	27088545	112	Incidence of Clostridium difficile infection	The number of patients that develope Clostridium difficile infection in the first 2 years after transplantation in each group, divided by the number of patients allocated in each group at randomization - chart review	1	3	336	5.6
85	Should Asymptomatic Bacteriuria Be Systematically Treated in Kidney Transplant Recipients? Results From a Randomized Controlled Trial	Organ transplants	27088545	112	Incidence of multidrug resistant bacteria colonisation/infection	The number of patients that develope multidrug resistant bacteria colonization/infection in the first 2 years after transplantation in each group, divided by the number of patients allocated in each group at randomization - chart review	1	3	336	5.6
85	Should Asymptomatic Bacteriuria Be Systematically Treated in Kidney Transplant Recipients? Results From a Randomized Controlled Trial	Organ transplants	27088545	112	Long-term graft function	Long-term graft function measured by average serum creatinine at several points until the end of follow-up - blood draw	2	3.5	784	13.0667
85	Should Asymptomatic Bacteriuria Be Systematically Treated in Kidney Transplant Recipients? Results From a Randomized Controlled Trial	Organ transplants	27088545	112	All-cause mortality	Chart review	1	3	336	5.6
86	Is there an effect of intranasal insulin on development and behaviour in Phelan-McDermid syndrome? A randomized, double-blind, placebo-controlled trial	Genetic disease	27577546	25	Behaviour	Assessed by two questionnaires applied in interview form: the Vineland Screener 0–6 and the Experimentele Schaal voor de beoordeling van het Sociaal-Emotionele Ontwikkelings Niveau (ESSEON)	5	37.5	4687.5	78.125
87	Effects of Housing First on Employment and Income of Homeless Individuals: Results of a Randomized Trial	Homelessness	26876657	2148	Quality of life	EQ5D	3	7.5	48330	805.5
88	Refeeding low weight hospitalized adolescents with anorexia nervosa: a multicenter randomized controlled trial	Eating disorders	26869609	36	Heart rate	Heart rate monitor	6	40	8640	144
88	Refeeding low weight hospitalized adolescents with anorexia nervosa: a multicenter randomized controlled trial	Eating disorders	26869609	36	Weight	Digital scales	6	20	4320	72
88	Refeeding low weight hospitalized adolescents with anorexia nervosa: a multicenter randomized controlled trial	Eating disorders	26869609	36	Biochemistry	Blood draw for glucose, insulin, phosphate, magnesium, potassium, white blood cell count	6	60	12960	216
89	Sustained-release dexamfetamine in the treatment of chronic cocaine-dependent patients on heroin-assisted treatment: a randomised, double-blind, placebo-controlled trial	Drug addiction	27015909	73	Number of cocaine-negative urine samples in the last 4 study weeks	Urine sample	8	10	5840	97.3333
89	Sustained-release dexamfetamine in the treatment of chronic cocaine-dependent patients on heroin-assisted treatment: a randomised, double-blind, placebo-controlled trial	Drug addiction	27015909	73	Changes in cocaine craving	Self-report	3	8	1752	29.2
89	Sustained-release dexamfetamine in the treatment of chronic cocaine-dependent patients on heroin-assisted treatment: a randomised, double-blind, placebo-controlled trial	Drug addiction	27015909	73	Use of other substances	Self-report	3	8	1752	29.2
89	Sustained-release dexamfetamine in the treatment of chronic cocaine-dependent patients on heroin-assisted treatment: a randomised, double-blind, placebo-controlled trial	Drug addiction	27015909	73	Physical and mental health	Self-report	3	8	1752	29.2
89	Sustained-release dexamfetamine in the treatment of chronic cocaine-dependent patients on heroin-assisted treatment: a randomised, double-blind, placebo-controlled trial	Drug addiction	27015909	73	Criminality	Self-report	3	8	1752	29.2
89	Sustained-release dexamfetamine in the treatment of chronic cocaine-dependent patients on heroin-assisted treatment: a randomised, double-blind, placebo-controlled trial	Drug addiction	27015909	73	Medication adherence	Medication taken under supervision	60	5	21900	365
89	Sustained-release dexamfetamine in the treatment of chronic cocaine-dependent patients on heroin-assisted treatment: a randomised, double-blind, placebo-controlled trial	Drug addiction	27015909	73	Safety	Number of patients that reported at least one serious adverse event, the number of serious adverse events, and electrocardiography and monitoring of heart rate, blood pressure and body weight	12	10	8760	146
90	Immediate versus delayed invasive intervention for non-STEMI patients: The RIDDLE-NSTEMI Study	Cardiology	26777321	323	Composite of all-cause death, myocardial reinfarction or recurrent ischemia	Occurrence assessed - chart review	1	0	0	0
90	Immediate versus delayed invasive intervention for non-STEMI patients: The RIDDLE-NSTEMI Study	Cardiology	26777321	323	All cause mortality	Occurrence assessed - chart review	4	3	3876	64.6
90	Immediate versus delayed invasive intervention for non-STEMI patients: The RIDDLE-NSTEMI Study	Cardiology	26777321	323	Myocardial reinfarction	Occurrence assessed - chart review	4	3	3876	64.6
90	Immediate versus delayed invasive intervention for non-STEMI patients: The RIDDLE-NSTEMI Study	Cardiology	26777321	323	Stroke	Occurrence assessed - chart review	4	3	3876	64.6
90	Immediate versus delayed invasive intervention for non-STEMI patients: The RIDDLE-NSTEMI Study	Cardiology	26777321	323	Recurrent ischemia	Occurrence assessed - chart review	1	3	969	16.15
90	Immediate versus delayed invasive intervention for non-STEMI patients: The RIDDLE-NSTEMI Study	Cardiology	26777321	323	Major bleeding	Occurrence assessed - chart review	4	3	3876	64.6
90	Immediate versus delayed invasive intervention for non-STEMI patients: The RIDDLE-NSTEMI Study	Cardiology	26777321	323	Duration of index hospitalisation	Duration of hospital stay is assessed - chart review	1	3	969	16.15
92	Belotecan/cisplatin versus etoposide/cisplatin in previously untreated patients with extensive-stage small cell lung carcinoma: a multi-center randomized phase III trial	Oncology	27566413	157	Overall response duration	eCRF review	1	30	4710	78.5
92	Belotecan/cisplatin versus etoposide/cisplatin in previously untreated patients with extensive-stage small cell lung carcinoma: a multi-center randomized phase III trial	Oncology	27566413	157	Time to progression	eCRF review	1	40	6280	104.667
92	Belotecan/cisplatin versus etoposide/cisplatin in previously untreated patients with extensive-stage small cell lung carcinoma: a multi-center randomized phase III trial	Oncology	27566413	157	Overall survival	eCRF review	1	40	6280	104.667
93	Duration of antibiotic treatment in community-acquired pneumonia: A multicenter randomized clinical trial	Lung disease	12226033	312	Duration of antibiotic treament	Days taking antibiotics from the first dose until the interruption of any antibiotic treatment during hospitalisation and at late follow up - chart review	1	3	936	15.6
93	Duration of antibiotic treatment in community-acquired pneumonia: A multicenter randomized clinical trial	Lung disease	12226033	312	Time until clinical improvement	Number of days patients took to feel better after discharge - question asked of patients	1	5	1560	26
93	Duration of antibiotic treatment in community-acquired pneumonia: A multicenter randomized clinical trial	Lung disease	12226033	312	Radiographic resolution	Chest radiography	2	15	9360	156
93	Duration of antibiotic treatment in community-acquired pneumonia: A multicenter randomized clinical trial	Lung disease	12226033	312	In-hospital mortality	In-hospital mortality - chart review	1	3	936	15.6
93	Duration of antibiotic treatment in community-acquired pneumonia: A multicenter randomized clinical trial	Lung disease	12226033	312	Mortality at day 30 after hospital admission	Mortality at day 30 after hospital admission - chart review	1	3	936	15.6
93	Duration of antibiotic treatment in community-acquired pneumonia: A multicenter randomized clinical trial	Lung disease	12226033	312	CAP recurrence	New or worsening symptoms related to pneumonia or appearance of a new respiratory infection in a patient classified as curedday 10 - chart review	1	3	936	15.6
93	Duration of antibiotic treatment in community-acquired pneumonia: A multicenter randomized clinical trial	Lung disease	12226033	312	Hospital readmission up to day 30 from hospital admission	Hospital admission up to day 30 - chart review	1	3	936	15.6
93	Duration of antibiotic treatment in community-acquired pneumonia: A multicenter randomized clinical trial	Lung disease	12226033	312	Complications during hospitalisation	Complications during hospitalisation - chart review	1	3	936	15.6
93	Duration of antibiotic treatment in community-acquired pneumonia: A multicenter randomized clinical trial	Lung disease	12226033	312	Number of days with adverse events	Such as diarrhea or headache - chart review	1	3	936	15.6
93	Duration of antibiotic treatment in community-acquired pneumonia: A multicenter randomized clinical trial	Lung disease	12226033	312	Length of hospital stay	Measured by subtracting date of admission from date of discharge - chart review	1	3	936	15.6
94	Seven-day intensive preoperative rehabilitation for elderly patients with lung cancer: a randomized controlled trial	Oncology	28032568	60	Post-operative length of stay	Chart review	1	3	180	3
94	Seven-day intensive preoperative rehabilitation for elderly patients with lung cancer: a randomized controlled trial	Oncology	28032568	60	Walking ability	6 minute walk test	2	8	960	16
94	Seven-day intensive preoperative rehabilitation for elderly patients with lung cancer: a randomized controlled trial	Oncology	28032568	60	Peak expiratory flow	Peak expiratory flow	2	3	360	6
94	Seven-day intensive preoperative rehabilitation for elderly patients with lung cancer: a randomized controlled trial	Oncology	28032568	60	Health related quality of life	Chart based on European Organization for Research and Treatment of Cancer (EORTC) QLQ-C30 LC13-CN (version 3)	2	12.5	1500	25
95	Effect of soy in men with type 2 diabetes mellitus and subclinical hypogonadism: A randomized controlled study	Diabetes	27797674	200	Changes in glycemia	Blood draw	2	3.5	1400	23.3333
95	Effect of soy in men with type 2 diabetes mellitus and subclinical hypogonadism: A randomized controlled study	Diabetes	27797674	200	Changes in cardiovascular risk markers - insulin resistance, lipid profile, high-sensitivity C-reactive protein, and endothelial function	Blood draw	2	3.5	1400	23.3333
96	Supported telemonitoring and glycemic control in people with type 2 diabetes: The telescot diabetes pragmatic multicenter randomized controlled trial	Diabetes	27458809	321	Daytime ambulatory bloody pressure (systolic and diastolic)	Ambulatory monitor	2	10	6420	107
96	Supported telemonitoring and glycemic control in people with type 2 diabetes: The telescot diabetes pragmatic multicenter randomized controlled trial	Diabetes	27458809	321	Weight	Research Nurse recorded from scales	2	3	1926	32.1
96	Supported telemonitoring and glycemic control in people with type 2 diabetes: The telescot diabetes pragmatic multicenter randomized controlled trial	Diabetes	27458809	321	Incremental cost-effectiveness	Cost per quality adjusted life year	2	3	1926	32.1
98	Behavioral weight loss intervention for migraine: A randomized controlled trial	Migraine	29178659	110	Change in body weight	Digital scales	3	5	1650	27.5
98	Behavioral weight loss intervention for migraine: A randomized controlled trial	Migraine	29178659	110	Changes in serum inflammatory markers	Blood draw	2	17.5	3850	64.1667
98	Behavioral weight loss intervention for migraine: A randomized controlled trial	Migraine	29178659	110	Changes in depression	Center for Epidemiologic Studies - Depression Scale	2	15	3300	55
98	Behavioral weight loss intervention for migraine: A randomized controlled trial	Migraine	29178659	110	Changes in physical activity	Assessed via a multi-sensor monitor	2	21	4620	77
98	Behavioral weight loss intervention for migraine: A randomized controlled trial	Migraine	29178659	110	Changes in fat intake and other diet/eating behaviour components	Measured via a multi-call 24 hour dietary recall procedure	2	40	8800	146.667
99	Clinic and home-based behavioral intervention for obesity in pre-schoolers: A randomized trial	Obesity	29150147	167	Change in BMI-z score	Weight and height	4	5	3340	55.6667
99	Clinic and home-based behavioral intervention for obesity in pre-schoolers: A randomized trial	Obesity	29150147	167	Change in caloric intake	Three 24 hour dietary recalls at each time point	4	90	60120	1002
99	Clinic and home-based behavioral intervention for obesity in pre-schoolers: A randomized trial	Obesity	29150147	167	Changes in parent calorie intake	Block 2005 Food Frequency	4	40	26720	445.333
99	Clinic and home-based behavioral intervention for obesity in pre-schoolers: A randomized trial	Obesity	29150147	167	Changes in parental physical activity	Paffenbarger Activity Questionnaire for calorie expenditure	4	10	6680	111.333
99	Clinic and home-based behavioral intervention for obesity in pre-schoolers: A randomized trial	Obesity	29150147	167	Health related quality of life	PedQL	4	5	3340	55.6667
100	Effects of clay art therapy on adults outpatients with major depressive disorder: A randomized controlled trial	Depression	28433887	106	General health	12 item General Health Questionnaire	3	10	3180	53
100	Effects of clay art therapy on adults outpatients with major depressive disorder: A randomized controlled trial	Depression	28433887	106	Wellbeing	Body-Mind-Spirit Well-Being Inventory (BMSWBI)	3	20	6360	106
100	Effects of clay art therapy on adults outpatients with major depressive disorder: A randomized controlled trial	Depression	28433887	106	Emotional understanding	20-item Toronto Alexithymia Scale (TAS-20-C)	3	15	4770	79.5
101	Effectiveness of irrigation with chlorhexidine after removal of mandibular third molars: A randomised controlled trial	Dentistry	29223633	100	Wound dehiscence	Scored according to size	2	3	600	10
101	Effectiveness of irrigation with chlorhexidine after removal of mandibular third molars: A randomised controlled trial	Dentistry	29223633	100	Food impaction	Scored using a four-point scale	2	3	600	10
102	The effects of multi-disciplinary psycho-social care on socio-economic problems in cancer patients: A cluster-randomized trial	Oncology	29270828	1012	Social functioning	EORTC QLQ-C30	2	13	26312	438.533
102	The effects of multi-disciplinary psycho-social care on socio-economic problems in cancer patients: A cluster-randomized trial	Oncology	29270828	1012	Satisfaction with treatment	Quality from the Patient's Perspective questionnaire (QPP)	2	13	26312	438.533
102	The effects of multi-disciplinary psycho-social care on socio-economic problems in cancer patients: A cluster-randomized trial	Oncology	29270828	1012	Comorbid mental disorders	Structured Clinical Interview for DSM-IV Axis I Disorders (DSM-IV, SCID)	2	13	26312	438.533
102	The effects of multi-disciplinary psycho-social care on socio-economic problems in cancer patients: A cluster-randomized trial	Oncology	29270828	1012	Use of healthcare services	Questionnaire, Bundesgesundheitssurvey	1	13	13156	219.267
103	Clinical effects of a pharmacist intervention in acute wards: A randomized controlled trial	Pharmacy	28457021	498	Length of hospital stay	Medical record check	1	1	498	8.3
103	Clinical effects of a pharmacist intervention in acute wards: A randomized controlled trial	Pharmacy	28457021	498	Number of readmissions during the first year after admission	Medical record check	1	1	498	8.3
103	Clinical effects of a pharmacist intervention in acute wards: A randomized controlled trial	Pharmacy	28457021	498	Direct cost for the hospital	Database enquiry	1	1	498	8.3
105	Reducing trunk compensation in stroke survivors: A randomized crossover trial comparing visual and force feedback modalities	Stroke	28526482	15	Trunk rotation	Measured by motion tracking camera	1	15	225	3.75
105	Reducing trunk compensation in stroke survivors: A randomized crossover trial comparing visual and force feedback modalities	Stroke	28526482	15	Index of curvature (measure of straightness of hands' path toward target	Measured by motion tracking camera	1	15	225	3.75
105	Reducing trunk compensation in stroke survivors: A randomized crossover trial comparing visual and force feedback modalities	Stroke	28526482	15	Root mean square error of hands' movement (difference between hand position on every iteration of the program)	Measured by motion tracking camera	1	15	225	3.75
105	Reducing trunk compensation in stroke survivors: A randomized crossover trial comparing visual and force feedback modalities	Stroke	28526482	15	Completion time for each trial	Measured by motion tracking camera	1	15	225	3.75
105	Reducing trunk compensation in stroke survivors: A randomized crossover trial comparing visual and force feedback modalities	Stroke	28526482	15	User experience and system's usability	Post-test questionnaire	1	8.5	127.5	2.125
106	Effect of Erythropoietin in patients with acute myocardial infarction: five-year results of the REVIVAL-3 trial	Cardiology	28109258	138	Changes in left ventricular ejection fraction and infarct size	MRI	2	45	12420	207
106	Effect of Erythropoietin in patients with acute myocardial infarction: five-year results of the REVIVAL-3 trial	Cardiology	28109258	138	Death, recurrent myocardial infarction, IRA-revacularisation and stoke	Chart review	2	10	2760	46
107	Does azithromycin given to women in labour decrease ocular bacterial infection in neonates? A double-blind, randomized trial	Neonatal infection	29282015	829	Prevalence of Vaginal bacterial Group B Streptococci, S.pneumoniae and S.aureus carriage at day six post-delivery	Vaginal swab	1	2.5	2072.5	34.5417
107	Does azithromycin given to women in labour decrease ocular bacterial infection in neonates? A double-blind, randomized trial	Neonatal infection	29282015	829	Vaginal bacterial (GBS, S.pneumoniae and S.aureus) carriage at day 8-10 post-delivery	Vaginal swab	1	2.5	2072.5	34.5417
108	Comparison of 3D laparoscopic gastrectomy with a 2D procedure for gastric cancer: A phase 3 randomized controlled trial	Oncology	29195739	438	Postoperative recovery course	Time to first ambulation, flatus, liquid diet and soft diet, duration of postoperative hospital stay and postoperative pain are used to assess the postoperative recovery course.	1	3	1314	21.9
108	Comparison of 3D laparoscopic gastrectomy with a 2D procedure for gastric cancer: A phase 3 randomized controlled trial	Oncology	29195739	438	Complications	(early complications occurred within 30 days after operation): pulmonary infection, incision complication, intestinal obstruction, abdominal infection, anastomotic bleeding, anastomotic fistula, gastric emptying; long term complications (30 days later aft	2	3	2628	43.8
108	Comparison of 3D laparoscopic gastrectomy with a 2D procedure for gastric cancer: A phase 3 randomized controlled trial	Oncology	29195739	438	Postoperative pathology	Chart review	1	3	1314	21.9
108	Comparison of 3D laparoscopic gastrectomy with a 2D procedure for gastric cancer: A phase 3 randomized controlled trial	Oncology	29195739	438	Inflamatory and immune response	Values of white blood cell count, hemoglobin, C-reactive protein, prealbumin and relevant immune cytokines including T cell percentage, T-helper lymphocytes (CD4+) percentage, T-suppressor lymphocytes (CD8+) percentage, natural killer (NK) cells %	3	7	9198	153.3
108	Comparison of 3D laparoscopic gastrectomy with a 2D procedure for gastric cancer: A phase 3 randomized controlled trial	Oncology	29195739	438	Morbidity and mortality	The early postoperative complication and mortality are defined as the event observed within 30 days after surgery, while the time frame for late complication is the period from postoperative day 31th to the end of month 36th.	2	3	2628	43.8
108	Comparison of 3D laparoscopic gastrectomy with a 2D procedure for gastric cancer: A phase 3 randomized controlled trial	Oncology	29195739	438	3-year disease free survival rate	Chart review	1	3	1314	21.9
108	Comparison of 3D laparoscopic gastrectomy with a 2D procedure for gastric cancer: A phase 3 randomized controlled trial	Oncology	29195739	438	3-year overall survival rate	Chart review	1	3	1314	21.9
109	Sutureless vs sutured gastroschisis closure: A prospective randomized controlled trial	Birth defects	28279777	39	Length of hospital stay	Chart review	1	3	117	1.95
109	Sutureless vs sutured gastroschisis closure: A prospective randomized controlled trial	Birth defects	28279777	39	Complications including bowel resection, sepsis, and death	Chart review	1	3	117	1.95
110	Application of zone model predictive control artificial pancreas during extended use of infusion set and sensor: A randomized crossover-controlled home-use trial	Diabetes		19	Effectiveness of sensor fault detection algorithm	Calculated using the complete dataset collected throughout the intervention - defined by a % of sensor failure caught by the system	1	0	0	0
110	Application of zone model predictive control artificial pancreas during extended use of infusion set and sensor: A randomized crossover-controlled home-use trial	Diabetes		19	Mean sensor glucose values	Calculated using the complete dataset collected throughout the intervention	1	0	0	0
110	Application of zone model predictive control artificial pancreas during extended use of infusion set and sensor: A randomized crossover-controlled home-use trial	Diabetes		19	Percent of time in range between 70-180mg/dl	Calculated using the complete dataset collected throughout the intervention	1	0	0	0
111	Effect of myofascial techniques for treatment of persistent arm pain after breast cancer treatment: Randomized controlled trial	Oncology	28914087	50	Pain prevalence rate	Questioned by “Have you had pain during the past week? (yes/ no).”)	3	1	150	2.5
111	Effect of myofascial techniques for treatment of persistent arm pain after breast cancer treatment: Randomized controlled trial	Oncology	28914087	50	Local pressure hypersensitivity	Measured by digital Wagner FPXTM algometer	3	7	1050	17.5
111	Effect of myofascial techniques for treatment of persistent arm pain after breast cancer treatment: Randomized controlled trial	Oncology	28914087	50	Pain quality	McGill pain questionnaire	3	5	750	12.5
112	Multidomain lifestyle intervention benefits a large elderly population at risk for cognitive decline and dementia regardless of baseline characteristics: The FINGER trial	Dementia	29055814	1260	Depression symptoms	Zung depression scale	3	13	49140	819
112	Multidomain lifestyle intervention benefits a large elderly population at risk for cognitive decline and dementia regardless of baseline characteristics: The FINGER trial	Dementia	29055814	1260	Disability	ADCS-ADL scale	3	13	49140	819
112	Multidomain lifestyle intervention benefits a large elderly population at risk for cognitive decline and dementia regardless of baseline characteristics: The FINGER trial	Dementia	29055814	1260	Quality of life	RAND-36 and 15D questionnaires	3	13	49140	819
112	Multidomain lifestyle intervention benefits a large elderly population at risk for cognitive decline and dementia regardless of baseline characteristics: The FINGER trial	Dementia	29055814	1260	Use of health resources	Questionnaire and register data	3	13	49140	819
112	Multidomain lifestyle intervention benefits a large elderly population at risk for cognitive decline and dementia regardless of baseline characteristics: The FINGER trial	Dementia	29055814	1260	Vascular and metabolic risk factors	Blood pressure and anthropometric measurements, blood draw	3	13	49140	819
112	Multidomain lifestyle intervention benefits a large elderly population at risk for cognitive decline and dementia regardless of baseline characteristics: The FINGER trial	Dementia	29055814	1260	Vascular and metabolic morbidity and mortality	Questionnaire and register data	3	13	49140	819
112	Multidomain lifestyle intervention benefits a large elderly population at risk for cognitive decline and dementia regardless of baseline characteristics: The FINGER trial	Dementia	29055814	1260	Changes in dietary biomarker levels	Blood draw	3	13	49140	819
113	Mercaptopurine versus placebo to prevent recurrence of Crohn’s disease after surgical resection (TOPPIC): A multicentre, double-blind randomised controlled trial	Gastroenterology	28404197	240	Changes in quality of life scores	Inflammatory Bowel Disease Questionnaire (IBDQ), Medical Outcome Survey Short Form 36 (SF36), and EQ5D	5	36.25	43500	725
113	Mercaptopurine versus placebo to prevent recurrence of Crohn’s disease after surgical resection (TOPPIC): A multicentre, double-blind randomised controlled trial	Gastroenterology	28404197	240	Recurrence of Crohns disease	Endoscopy	2	30	14400	240
113	Mercaptopurine versus placebo to prevent recurrence of Crohn’s disease after surgical resection (TOPPIC): A multicentre, double-blind randomised controlled trial	Gastroenterology	28404197	240	Relation of faecal calprotectin to time of disease recurrence	Samples for assay of faecal calprotectin - stool sample	5	2.5	3000	50
113	Mercaptopurine versus placebo to prevent recurrence of Crohn’s disease after surgical resection (TOPPIC): A multicentre, double-blind randomised controlled trial	Gastroenterology	28404197	240	Relation of drug metabolite levels to time of disease recurrence	Samples for assay - stool sample	5	2.5	3000	50
113	Mercaptopurine versus placebo to prevent recurrence of Crohn’s disease after surgical resection (TOPPIC): A multicentre, double-blind randomised controlled trial	Gastroenterology	28404197	240	Exploratory analyses of clinical, genetic and serological markers for predicting disease recurrence	Blood draw	31	3.5	26040	434
114	Work-focused cognitive behavioural intervention for psychological complaints in patients on sick leave due to work-related stress: Results from a randomized controlled trial	Stress	28830555	163	Quality of sleep	Adapted version of the Nordic Sleep Questionnaire	3	3	1467	24.45
114	Work-focused cognitive behavioural intervention for psychological complaints in patients on sick leave due to work-related stress: Results from a randomized controlled trial	Stress	28830555	163	Cognitive function	Adapted version of the Cognitive Failure Questionnaire	3	3	1467	24.45
114	Work-focused cognitive behavioural intervention for psychological complaints in patients on sick leave due to work-related stress: Results from a randomized controlled trial	Stress	28830555	163	Duration of sick-leave	Self-reported and register based	3	3	1467	24.45
115	Efficacy of guided self-help behavioural activation and physical acivity for depression: A randomized controlled trial	Depression	28644740	59	Physical activity	The Godin-Leisure-Time Exercise Questionnaire	4	5	1180	19.6667
117	Acupressure, sleep, and quality of life in institutionalized older adults: A randomized controlled clinical trial	Sleep disorders	28152177	62	Quality of life	SF36	3	8.75	1627.5	27.125
119	Repetitive TMS to augment cognitive processing therapy in combat veterans of recent conflicts with PTSD: A randomized clinical trial	PTSD	29351885	103	PTSD Checklist	PTSD Checklist (PCL)	6	5	3090	51.5
120	Minimally invasive versus abdominal radical hysterectomy for cervical cancer	Oncology	30380365	631	Recurrence: Pattern/site of recurrence	Date and localisation of 1st recurrence as confirmed histologically - Compare patterns between groups	13	5	41015	683.583
120	Minimally invasive versus abdominal radical hysterectomy for cervical cancer	Oncology	30380365	631	Quality of life	Questionnaire - Compare QoL between groups - MD Anderson Symptom Assessment Index (MDSAI), Functional Assessmentof Cancer Therapy(FACT-Cx) and the general 12-Item Short-Form Health Survey (SF-12) between baseline and 6 months after surgery	8	20	100960	1682.67
120	Minimally invasive versus abdominal radical hysterectomy for cervical cancer	Oncology	30380365	631	Pelvic floor function	Pelvic Floor Distress Inventory Questionnaire (PFDI) - Compare PFDI between groups	8	15	75720	1262
120	Minimally invasive versus abdominal radical hysterectomy for cervical cancer	Oncology	30380365	631	Overall survival at 4.5 years follow-up	Compare between groups - Kaplan-Meier method	1	6.25	3943.75	65.7292
120	Minimally invasive versus abdominal radical hysterectomy for cervical cancer	Oncology	30380365	631	Morbidity - Intra-operative, peri-operative, post-operative and long term treatment related morbidity	Compare these between groups - chart review	13	3	24609	410.15
121	Classroom-based physical activity improves children’s math achievement – A randomized controlled trial	School achievement	30557397	505	Cardiovascular fitness	Measured by the Andersen intermittent running test	2	20	20200	336.667
121	Classroom-based physical activity improves children’s math achievement – A randomized controlled trial	School achievement	30557397	505	Body composition	Height and weight - Harpenden stadiometer and electronic scale	2	5	5050	84.1667
121	Classroom-based physical activity improves children’s math achievement – A randomized controlled trial	School achievement	30557397	505	Activity behaviour	Questionnaires sent via SMS	36	5	90900	1515
121	Classroom-based physical activity improves children’s math achievement – A randomized controlled trial	School achievement	30557397	505	Objective physical activity level	Measured by accelerometry	2	5	5050	84.1667
121	Classroom-based physical activity improves children’s math achievement – A randomized controlled trial	School achievement	30557397	505	Physical activity during maths lessons	Measured by accelerometry	2	5	5050	84.1667
121	Classroom-based physical activity improves children’s math achievement – A randomized controlled trial	School achievement	30557397	505	Executive functions	Measured by a modified Eriksen flanker task	2	10	10100	168.333
121	Classroom-based physical activity improves children’s math achievement – A randomized controlled trial	School achievement	30557397	505	Creativity	Torrance test of creativity	2	40	40400	673.333
121	Classroom-based physical activity improves children’s math achievement – A randomized controlled trial	School achievement	30557397	505	Teacher motivation	Short message service during the last 6 months of the intervention period	6	3	9090	151.5
121	Classroom-based physical activity improves children’s math achievement – A randomized controlled trial	School achievement	30557397	505	Executive function	Measured by the BRIEF-questionnaire	2	15	15150	252.5
122	Effect of a low-intensity PSA-based screening based intervention on prostate cancer mortality: The CAP randomized clinical trial	Oncology	29509864	415357	All-cause mortality	Automatically flagged by HSCIC (NHS Digital)	1	0	0	0
122	Effect of a low-intensity PSA-based screening based intervention on prostate cancer mortality: The CAP randomized clinical trial	Oncology	29509864	415357	Disease status and staging	Chart review	4	3	4984284	83071.4
122	Effect of a low-intensity PSA-based screening based intervention on prostate cancer mortality: The CAP randomized clinical trial	Oncology	29509864	415357	Cost-effectiveness	Chart review	4	3	4984284	83071.4
122	Effect of a low-intensity PSA-based screening based intervention on prostate cancer mortality: The CAP randomized clinical trial	Oncology	29509864	415357	Health-related quality of life	Hospital Anxiety and Depression Scale (HADS), 12-item Short Form Health Survey (SF-12), Profile of Mood States - short form (POMS-SF) and Impact of Events Scale (IES), for participants that were in testing groups (i.e. not those that were being followed u	4	43	71441404	1.19069e+06
123	Prophylaxis of postoperative nausea and vomiting after cardiac surgery in high-risk patients: A randomized controlled study	Vomiting	29336385	502	Number of nausea and vomiting events	Each assessed according to a visual analog scale (VAS) in terms of severity, and antiemetics used to treat each episode	1	3	1506	25.1
123	Prophylaxis of postoperative nausea and vomiting after cardiac surgery in high-risk patients: A randomized controlled study	Vomiting	29336385	502	Postoperative pain	Visual analog scale (VAS) with number, type and dose of analgesis drugs used	1	3	1506	25.1
123	Prophylaxis of postoperative nausea and vomiting after cardiac surgery in high-risk patients: A randomized controlled study	Vomiting	29336385	502	Postoperative discomfort	Visual analog scale (VAS)	1	3	1506	25.1
124	Effects of long-term norfloxacin therapy in patients with advanced cirrhosis	Liver disease	30144431	291	12 month mortality	Kaplan-Meier method	2	5	2910	48.5
124	Effects of long-term norfloxacin therapy in patients with advanced cirrhosis	Liver disease	30144431	291	Number of patients with liver transplantation	Number of patients with liver transplantation	8	5	11640	194
124	Effects of long-term norfloxacin therapy in patients with advanced cirrhosis	Liver disease	30144431	291	Complications	Infection rates	8	10	23280	388
125	Cervical ripening balloon with and without oxytocin in multiparas: A randomized controlled trial	Childbirth	29763609	195	Induction to delivery interval	Observation	1	3	585	9.75
125	Cervical ripening balloon with and without oxytocin in multiparas: A randomized controlled trial	Childbirth	29763609	195	Time to cervical ripening balloon expulsion	Observation	1	3	585	9.75
125	Cervical ripening balloon with and without oxytocin in multiparas: A randomized controlled trial	Childbirth	29763609	195	Mode of delivery	Observation	1	3	585	9.75
125	Cervical ripening balloon with and without oxytocin in multiparas: A randomized controlled trial	Childbirth	29763609	195	Adverse maternal or neonatal outcomes	Chart review	1	3	585	9.75
126	Self-tracking of physical activity in people with type 2 diabetes	Diabetes	29742550	72	Advanced glycation end products	Skin fluorescence	2	5	720	12
126	Self-tracking of physical activity in people with type 2 diabetes	Diabetes	29742550	72	Weight and height	Scales/measurements	2	2	288	4.8
126	Self-tracking of physical activity in people with type 2 diabetes	Diabetes	29742550	72	Waist to hip ratio	Measurement	2	5	720	12
126	Self-tracking of physical activity in people with type 2 diabetes	Diabetes	29742550	72	Subjective health scare	Visual analogue scaled, online	2	1.5	216	3.6
126	Self-tracking of physical activity in people with type 2 diabetes	Diabetes	29742550	72	Changes in use and dose of medication	Medical file review	2	20	2880	48
126	Self-tracking of physical activity in people with type 2 diabetes	Diabetes	29742550	72	Behavioral factors	17 item questionnaire	2	12.5	1800	30
127	An 18-mo randomized, double-blind, placebo-controlled trial of DHA-rich fish oil to prevent age-related cognitive decline in cognitively normal older adults	Dementia	29722833	403	Plasma fatty acid changes	Blood draw	4	3.5	5642	94.0333
127	An 18-mo randomized, double-blind, placebo-controlled trial of DHA-rich fish oil to prevent age-related cognitive decline in cognitively normal older adults	Dementia	29722833	403	Blood pressure	Blood pressure monitor	4	3	4836	80.6
127	An 18-mo randomized, double-blind, placebo-controlled trial of DHA-rich fish oil to prevent age-related cognitive decline in cognitively normal older adults	Dementia	29722833	403	Oxidative stress	Blood draw	4	3.5	5642	94.0333
127	An 18-mo randomized, double-blind, placebo-controlled trial of DHA-rich fish oil to prevent age-related cognitive decline in cognitively normal older adults	Dementia	29722833	403	Inflammation	Blood draw	4	3.5	5642	94.0333
128	Effects of a combined physical and psychosocial training for children with cancer: A randomized controlled trial	Oncology	30587148	59	Fatigue	Overall fatigue score of the child self-report version of the PedsQL Multidimensional fatigue scale (acute version)	3	17.5	3097.5	51.625
128	Effects of a combined physical and psychosocial training for children with cancer: A randomized controlled trial	Oncology	30587148	59	Body composition	Percentage of fat mass and lumbar spine BMD as measured by DXA	3	17.5	3097.5	51.625
128	Effects of a combined physical and psychosocial training for children with cancer: A randomized controlled trial	Oncology	30587148	59	Physical activity	Actial accelerometer worn Wednesday to Saturday in the week following the measurements in the hospital	3	17.5	3097.5	51.625
128	Effects of a combined physical and psychosocial training for children with cancer: A randomized controlled trial	Oncology	30587148	59	Depression symptoms	Children's Depression Inventory for children 8-18 years	3	17.5	3097.5	51.625
128	Effects of a combined physical and psychosocial training for children with cancer: A randomized controlled trial	Oncology	30587148	59	Health-related quality of life	Dutch self-report version of the PedsQL™ Generic Core Scales for children aged 8–12 and 12–18 years	3	17.5	3097.5	51.625
128	Effects of a combined physical and psychosocial training for children with cancer: A randomized controlled trial	Oncology	30587148	59	Self-perception	Athletic competence and global self-worth subscales of the ‘Self-Perception Profile’ for children aged 8–11 years and for adolescents aged 12–18 years	3	17.5	3097.5	51.625
128	Effects of a combined physical and psychosocial training for children with cancer: A randomized controlled trial	Oncology	30587148	59	Behavioural problems	Youth Self-Report	3	17.5	3097.5	51.625
132	Managing risk of non-communicable diseases in women with bulimia nervosa or binge eating disorders: A randomized trial with 12 months follow-up	Eating disorders	30513892	164	Global measurement of general psychopathology	Beck's Anxiety Inventory (BAI), Beck Depression Inventory (BDI), QoL (Diener), Utrecht Coping List, Resilience Scale for Adults, the outcome rating scale (ORS), the three-factor eating questionnaire (TFEQ), Binge eating Scale (BES), Cantril's Ladder, Exer	5	107	87740	1462.33
132	Managing risk of non-communicable diseases in women with bulimia nervosa or binge eating disorders: A randomized trial with 12 months follow-up	Eating disorders	30513892	164	Group climate	Coerciveness scale from Therapeutic Factor Inventory	16	10	26240	437.333
132	Managing risk of non-communicable diseases in women with bulimia nervosa or binge eating disorders: A randomized trial with 12 months follow-up	Eating disorders	30513892	164	Working alliance	Working Alliance Inventory	16	20	52480	874.667
133	Communication-based interventions for increasing influenza vaccination rates among Aboriginal children: A randomised controlled trial	Infectious disease	30279091	5534	Uptake of the influenza vaccination among Aboriginal identified children	Data download from registry	1	1	5534	92.2333
134	Garlic extract favourably modifies markers of endothelial function in obese patients – randomized double blind placebo-controlled nutritional intervention	Obesity	29604599	92	Systolic blood pressure	Digital electronic tensiometer	2	2	368	6.13333
134	Garlic extract favourably modifies markers of endothelial function in obese patients – randomized double blind placebo-controlled nutritional intervention	Obesity	29604599	92	Diastolic blood pressure	Digital electronic tensiometer	2	2	368	6.13333
134	Garlic extract favourably modifies markers of endothelial function in obese patients – randomized double blind placebo-controlled nutritional intervention	Obesity	29604599	92	Total antioxidant status	Blood draw	2	3.5	644	10.7333
134	Garlic extract favourably modifies markers of endothelial function in obese patients – randomized double blind placebo-controlled nutritional intervention	Obesity	29604599	92	Lipid profile	Blood draw	2	3.5	644	10.7333
135	Bag-Mask Ventilation during Tracheal Intubation of Critically Ill Adults	Respiratory	30779528	401	Incidence of lowest oxygen saturation less than 90%	Measured by continuous pulse oximetry (SpO2)	1	3	1203	20.05
135	Bag-Mask Ventilation during Tracheal Intubation of Critically Ill Adults	Respiratory	30779528	401	Incidence of lowest oxygen saturation less than 80%	Measured by continuous pulse oximetry (SpO2)	1	3	1203	20.05
135	Bag-Mask Ventilation during Tracheal Intubation of Critically Ill Adults	Respiratory	30779528	401	Change in saturation from induction to lowest oxygen saturation	Measured by continuous pulse oximetry (SpO2)	1	3	1203	20.05
135	Bag-Mask Ventilation during Tracheal Intubation of Critically Ill Adults	Respiratory	30779528	401	Incidence of desaturation	Measured by continuous pulse oximetry (SpO2)	1	3	1203	20.05
135	Bag-Mask Ventilation during Tracheal Intubation of Critically Ill Adults	Respiratory	30779528	401	Lowest oxygen saturation in the 24 hours after intubation	Measured by continuous pulse oximetry (SpO2)	1	3	1203	20.05
135	Bag-Mask Ventilation during Tracheal Intubation of Critically Ill Adults	Respiratory	30779528	401	Highest fraction of inspired oxygen in the 24 hours after intubation	Measured by continuous pulse oximetry (SpO2)	1	3	1203	20.05
135	Bag-Mask Ventilation during Tracheal Intubation of Critically Ill Adults	Respiratory	30779528	401	Highest positive end expiratory pressure in the 24 hours after intubation	Measured by continuous pulse oximetry (SpO2)	1	3	1203	20.05
135	Bag-Mask Ventilation during Tracheal Intubation of Critically Ill Adults	Respiratory	30779528	401	Lowest oxygen saturation, highest fraction of inspired oxygen, and highest positive end expiratory pressure	From 0-1, 1-6, and 6-24 hours after intubation	3	3	3609	60.15
135	Bag-Mask Ventilation during Tracheal Intubation of Critically Ill Adults	Respiratory	30779528	401	Operator-reported pulmonary aspiration	Visualization of oropharyngeal or gastric contents in the pharynx, larynx, or trachea between induction and completion of airway management.	1	5	2005	33.4167
135	Bag-Mask Ventilation during Tracheal Intubation of Critically Ill Adults	Respiratory	30779528	401	New infiltrate on chest imaging in the 48 hours after intubation	Two blinded experts (pulmonary/critical care attendings or fellows) with adjudication by a third expert in the case of discordant results	1	15	6015	100.25
135	Bag-Mask Ventilation during Tracheal Intubation of Critically Ill Adults	Respiratory	30779528	401	Operator-reported pulmonary aspiration, new chest x-ray infiltrate, OR lowest oxygen saturation < 80%	Composite outcome	1	3	1203	20.05
135	Bag-Mask Ventilation during Tracheal Intubation of Critically Ill Adults	Respiratory	30779528	401	New pneumothorax or pneumomediastinum on chest imaging in the 24 hours after intubation	Chest radiography	1	15	6015	100.25
135	Bag-Mask Ventilation during Tracheal Intubation of Critically Ill Adults	Respiratory	30779528	401	Incidence of esophageal intubation		1	3	1203	20.05
135	Bag-Mask Ventilation during Tracheal Intubation of Critically Ill Adults	Respiratory	30779528	401	Lowest systolic blood pressure (peri-procedural)	Lowest systolic blood pressure between induction and two minutes after completion of the airway management procedure	1	5	2005	33.4167
135	Bag-Mask Ventilation during Tracheal Intubation of Critically Ill Adults	Respiratory	30779528	401	New systolic blood pressure < 65 mmHg or new need for vasopressor	New systolic blood pressure < 65 mmHg or new need for vasopressor between medication administration and 2 minutes following successful placement of an endotracheal tube	1	5	2005	33.4167
135	Bag-Mask Ventilation during Tracheal Intubation of Critically Ill Adults	Respiratory	30779528	401	Cardiac arrest within one hour of intubation	Chart review	1	3	1203	20.05
135	Bag-Mask Ventilation during Tracheal Intubation of Critically Ill Adults	Respiratory	30779528	401	Death within one hour of intubation	Chart review	1	3	1203	20.05
135	Bag-Mask Ventilation during Tracheal Intubation of Critically Ill Adults	Respiratory	30779528	401	Cormack-Lehane grade of glottic view	Cormack-Lehane grading	1	2	802	13.3667
135	Bag-Mask Ventilation during Tracheal Intubation of Critically Ill Adults	Respiratory	30779528	401	Operator-assessed difficulty of intubation	Operator report	1	2	802	13.3667
135	Bag-Mask Ventilation during Tracheal Intubation of Critically Ill Adults	Respiratory	30779528	401	Incidence of successful intubation on the first laryngoscopy attempt		1	3	1203	20.05
135	Bag-Mask Ventilation during Tracheal Intubation of Critically Ill Adults	Respiratory	30779528	401	Number of laryngoscopy attempts	Chart review	1	3	1203	20.05
135	Bag-Mask Ventilation during Tracheal Intubation of Critically Ill Adults	Respiratory	30779528	401	Time from induction to successful intubation		1	3	1203	20.05
135	Bag-Mask Ventilation during Tracheal Intubation of Critically Ill Adults	Respiratory	30779528	401	Need for additional airway equipment or a second operator	Chart review	1	3	1203	20.05
135	Bag-Mask Ventilation during Tracheal Intubation of Critically Ill Adults	Respiratory	30779528	401	In-hospital mortality	At 28 days - chart review	1	3	1203	20.05
135	Bag-Mask Ventilation during Tracheal Intubation of Critically Ill Adults	Respiratory	30779528	401	Ventilator-free days	At 28 days - chart review	1	3	1203	20.05
135	Bag-Mask Ventilation during Tracheal Intubation of Critically Ill Adults	Respiratory	30779528	401	Intensive care unit-free days	At 28 days - chart review	1	3	1203	20.05
136	Design of the SHAPE-2 study: the effect of physical activity, in addition to weight loss, on biomarkers of postmenopausal breast cancer risk	Obesity	23972905	243	Anthropometrics and physical fitness	BMI, weight, waist- and hip- circumference, total body fat (DEX scan), abdominal far (subcutaneous and visceral, MRI-abdomen) and physical fitness (maximal exercise capacity test by the ramp protocol)	2	85	41310	688.5
137	Satisfactory analgesia with minimal emesis in day surgeries: a randomised controlled trial of morphine versus hydromorphone	Pain	31027915	402	Severe itching	Visual analog scale 0-10	1	3	1206	20.1
137	Satisfactory analgesia with minimal emesis in day surgeries: a randomised controlled trial of morphine versus hydromorphone	Pain	31027915	402	Severe sedation	Ramsay Sedation Scale 0-6	1	2	804	13.4
137	Satisfactory analgesia with minimal emesis in day surgeries: a randomised controlled trial of morphine versus hydromorphone	Pain	31027915	402	Severe respiratory depression	Presence of Respiratory Rate below 10 and/or Presence of Oxygen Saturation <90	1	5	2010	33.5
137	Satisfactory analgesia with minimal emesis in day surgeries: a randomised controlled trial of morphine versus hydromorphone	Pain	31027915	402	Use of Ketorolac	Use of rescue drug for pain - chart review	1	3	1206	20.1
137	Satisfactory analgesia with minimal emesis in day surgeries: a randomised controlled trial of morphine versus hydromorphone	Pain	31027915	402	Mean dose of analgesic used	Mean dose of analgesic used - chart review	1	3	1206	20.1
137	Satisfactory analgesia with minimal emesis in day surgeries: a randomised controlled trial of morphine versus hydromorphone	Pain	31027915	402	Patient satisfaction	Patient Satisfaction Score	1	10	4020	67
137	Satisfactory analgesia with minimal emesis in day surgeries: a randomised controlled trial of morphine versus hydromorphone	Pain	31027915	402	Time to discharge from PACU	Time to discharge from PACU - chart review	1	3	1206	20.1
137	Satisfactory analgesia with minimal emesis in day surgeries: a randomised controlled trial of morphine versus hydromorphone	Pain	31027915	402	Time to discharge from hospital	Time to discharge from hospital - chart review	1	3	1206	20.1
138	Effects of home reading training on reading and quality of life in AMD-a randomized and controlled study	Eye disease	31111250	37	Eye movements	Using a scanning laser ophthalmoscope	3	10	1110	18.5
138	Effects of home reading training on reading and quality of life in AMD-a randomized and controlled study	Eye disease	31111250	37	Fixation stability	Measured by calculating the fixation stability index (FSI)	3	5	555	9.25
138	Effects of home reading training on reading and quality of life in AMD-a randomized and controlled study	Eye disease	31111250	37	Retinal locus for fixation of a cross	Performed according to Rohrschneider	3	10	1110	18.5
138	Effects of home reading training on reading and quality of life in AMD-a randomized and controlled study	Eye disease	31111250	37	Reading single words	Scanning laser ophthalmoscope (SLO)	3	10	1110	18.5
138	Effects of home reading training on reading and quality of life in AMD-a randomized and controlled study	Eye disease	31111250	37	Degree of depression	Using the Montgomery-Asberg Depression Rating Scale	3	17.5	1942.5	32.375
138	Effects of home reading training on reading and quality of life in AMD-a randomized and controlled study	Eye disease	31111250	37	Cognition	Dementia detection test (DemTect)	3	10	1110	18.5
138	Effects of home reading training on reading and quality of life in AMD-a randomized and controlled study	Eye disease	31111250	37	Quality of life	German version of the Impact of Vision Impairment (IVI) questionnaire	3	12	1332	22.2
139	Nocturnal temperature-controlled laminar airflow device for adults with severe allergic asthma: the LASER RCT	Asthma	31232684	240	Treatment effect on quality of life	Patient questionnaires - standardised asthma quality of life questionnaire (AQLQ(S)), and EuroQol-5 Dimensions, five level (EQ5D-5L)	4	10	9600	160
140	A randomized trial of trigger point dry needling versus sham needling for chronic tension-type headache	Headache	30813155	161	Frequency and duraction of headache, and quality of life	Short Form-36	3	15	7245	120.75
141	Cost-effectiveness and quality of life of a diet intervention postpartum: 2-year results from a randomized controlled trial	Obesity	30621673	110	Cost-effectiveness	Cost-utility analysis with a health care perspective and included costs of intervention for stakeholder, quality-adjusted life-years (QALYs) gained and savings in health care	2	16.75	3685	61.4167
142	Discontinuing cotrimoxazole preventive therapy in HIV-infected adults who are stable on antiretroviral treatment in Uganda (COSTOP): A randomised placebo-controlled trial	HIV	30596666	2180	All-cause mortality	All-cause mortality - chart review	1	3	6540	109
142	Discontinuing cotrimoxazole preventive therapy in HIV-infected adults who are stable on antiretroviral treatment in Uganda (COSTOP): A randomised placebo-controlled trial	HIV	30596666	2180	Changes in CD4 count and other haematological parameters 48 weeks after enrollment	Blood draw	1	3.5	7630	127.167
142	Discontinuing cotrimoxazole preventive therapy in HIV-infected adults who are stable on antiretroviral treatment in Uganda (COSTOP): A randomised placebo-controlled trial	HIV	30596666	2180	Adherence to ART, trial drug and ITN use	Evaluated at the end of the trial	1	3	6540	109
143	Goal-oriented cognitive rehabilitation for early-stage Alzheimer's and related dementias: the GREAT RCT	Dementia	30879470	475	Participant response - Self-rated quality of life	Assessed with DEMentia Quality Of Life questionnaire	2	10	9500	158.333
143	Goal-oriented cognitive rehabilitation for early-stage Alzheimer's and related dementias: the GREAT RCT	Dementia	30879470	475	Participant response - Self-efficacy	Generalised Self-Efficacy Scale	2	4	3800	63.3333
143	Goal-oriented cognitive rehabilitation for early-stage Alzheimer's and related dementias: the GREAT RCT	Dementia	30879470	475	Participant response - Mood	Hospital Anxiety and Depression Scale (HADS)	2	13	12350	205.833
143	Goal-oriented cognitive rehabilitation for early-stage Alzheimer's and related dementias: the GREAT RCT	Dementia	30879470	475	Carer response - Stress	Relatives' Stress Scale (RSS)	2	5	4750	79.1667
143	Goal-oriented cognitive rehabilitation for early-stage Alzheimer's and related dementias: the GREAT RCT	Dementia	30879470	475	Carer response - Quality of life	World Health Organisation's Quality of Life Instrument - brief version	2	10	9500	158.333
143	Goal-oriented cognitive rehabilitation for early-stage Alzheimer's and related dementias: the GREAT RCT	Dementia	30879470	475	Carer response - Health status	EuroQol-5 Dimensions	2	5	4750	79.1667
144	Lung protective ventilation during pulmonary resection in children: a prospective, single-centre, randomised controlled trial	Lung disease	30916035	114	The number of patients with desaturation	SpO2 < 90% - assumed chart review	1	3	342	5.7
144	Lung protective ventilation during pulmonary resection in children: a prospective, single-centre, randomised controlled trial	Lung disease	30916035	114	Number of patients with extrapulmonary complication	Post operative - chart review	1	3	342	5.7
144	Lung protective ventilation during pulmonary resection in children: a prospective, single-centre, randomised controlled trial	Lung disease	30916035	114	Mean duration of mechanical ventilation	Duration of mechanical ventilation - chart review	1	3	342	5.7
144	Lung protective ventilation during pulmonary resection in children: a prospective, single-centre, randomised controlled trial	Lung disease	30916035	114	Mean duration of ICU stay	Duration of ICU stay - chart review	1	3	342	5.7
145	Cuff-assisted versus cap-assisted colonoscopy for adenoma detection: results of a randomized study	Screening	31096275	711	Mean number of adenomas	Chart review	1	3	2133	35.55
145	Cuff-assisted versus cap-assisted colonoscopy for adenoma detection: results of a randomized study	Screening	31096275	711	Mean number of polyps	Chart review	1	3	2133	35.55
145	Cuff-assisted versus cap-assisted colonoscopy for adenoma detection: results of a randomized study	Screening	31096275	711	Polyp detection rate	Chart review	1	3	2133	35.55
145	Cuff-assisted versus cap-assisted colonoscopy for adenoma detection: results of a randomized study	Screening	31096275	711	Cacel intubation rate	Chart review	1	3	2133	35.55
145	Cuff-assisted versus cap-assisted colonoscopy for adenoma detection: results of a randomized study	Screening	31096275	711	Time to cecal intubation	Chart review	1	3	2133	35.55
146	Selective laser trabeculoplasty versus drops for newly diagnosed ocular hypertension and glaucoma: the LiGHT RCT	Eye disease	31264958	718	Treatment pathway health-care resource use, cost and cost-effectiveness	Questionnaire	7	5	25130	418.833
146	Selective laser trabeculoplasty versus drops for newly diagnosed ocular hypertension and glaucoma: the LiGHT RCT	Eye disease	31264958	718	Glaucoma-specific treatment-related quality of life	Glaucoma Utility Index	7	5	25130	418.833
146	Selective laser trabeculoplasty versus drops for newly diagnosed ocular hypertension and glaucoma: the LiGHT RCT	Eye disease	31264958	718	Disease and treatment-related symptoms	Glaucoma Symptom Scale	7	5	25130	418.833
146	Selective laser trabeculoplasty versus drops for newly diagnosed ocular hypertension and glaucoma: the LiGHT RCT	Eye disease	31264958	718	Visual function	Glaucoma Quality of Life 15 (GQL-15)	7	5	25130	418.833
146	Selective laser trabeculoplasty versus drops for newly diagnosed ocular hypertension and glaucoma: the LiGHT RCT	Eye disease	31264958	718	Objective measurements of pathway effectiveness for IOP-lowering and visual function preservation	IOP measurements take less than 5 minutes accounting for instilling drops and the actual measurement – this was probably measured at every visit/follow-up. VF testing, used for assessing visual function has a variable duration depending on the patient, bu	7	5	25130	418.833
146	Selective laser trabeculoplasty versus drops for newly diagnosed ocular hypertension and glaucoma: the LiGHT RCT	Eye disease	31264958	718	Objective safety measures for each pathway	Could have been assessed in various ways, depending on the clinical findings including but not limited to: IOP measuring <5 minutes, slit lamp examination 5 minutes, eye drop intolerances/adverse events as part of history taking (done at every visit/follo	7	17.5	87955	1465.92
146	Selective laser trabeculoplasty versus drops for newly diagnosed ocular hypertension and glaucoma: the LiGHT RCT	Eye disease	31264958	718	Concordance assessed by two questions shown to predict the probability of non-concordance	Questions embedded within other questionnaires	7	4	20104	335.067
147	Inflammatory markers response to citrulline supplementation in patients with non-alcoholic fatty liver disease: a randomized, double blind, placebo-controlled, clinical trial	Liver disease	30767788	50	Carbohydrate intake	Questionnaire gram per day	2	3.75	375	6.25
147	Inflammatory markers response to citrulline supplementation in patients with non-alcoholic fatty liver disease: a randomized, double blind, placebo-controlled, clinical trial	Liver disease	30767788	50	Monounsaturated fatty acids (MUFA) intake	Questionnaire gram per day	2	3.75	375	6.25
147	Inflammatory markers response to citrulline supplementation in patients with non-alcoholic fatty liver disease: a randomized, double blind, placebo-controlled, clinical trial	Liver disease	30767788	50	Protein intake	Questionnaire gram per day	2	3.75	375	6.25
147	Inflammatory markers response to citrulline supplementation in patients with non-alcoholic fatty liver disease: a randomized, double blind, placebo-controlled, clinical trial	Liver disease	30767788	50	Polyunsaturated fatty acids (PUFA) intake	Questionnaire gram per day	2	3.75	375	6.25
147	Inflammatory markers response to citrulline supplementation in patients with non-alcoholic fatty liver disease: a randomized, double blind, placebo-controlled, clinical trial	Liver disease	30767788	50	Saturated fatty acid (SAFA) intake	Questionnaire gram per day	2	3.75	375	6.25
147	Inflammatory markers response to citrulline supplementation in patients with non-alcoholic fatty liver disease: a randomized, double blind, placebo-controlled, clinical trial	Liver disease	30767788	50	Total energy intake	Questionnaire Kcal per day	2	3.75	375	6.25
147	Inflammatory markers response to citrulline supplementation in patients with non-alcoholic fatty liver disease: a randomized, double blind, placebo-controlled, clinical trial	Liver disease	30767788	50	Total fat intake	Questionnaire gram per day	2	3.75	375	6.25
147	Inflammatory markers response to citrulline supplementation in patients with non-alcoholic fatty liver disease: a randomized, double blind, placebo-controlled, clinical trial	Liver disease	30767788	50	Total fiber intake	Questionnaire gram per day	2	3.75	375	6.25
148	Effect of manual physiotherapy in homogeneous individuals with subacromial shoulder impingement: A randomized controlled trial	Musculoskeletal	30680850	69	Pain rating	11-point NPRS ranging from 0 (no pain) to 10 (worst pain imaginable)	4	1	276	4.6
148	Effect of manual physiotherapy in homogeneous individuals with subacromial shoulder impingement: A randomized controlled trial	Musculoskeletal	30680850	69	Pain and disability associated with shoulder impairment	Shoulder pain and disability index (SPADI)	4	5	1380	23
149	Adjuvant Chemotherapy plus Radiation for Locally Advanced Endometrial Cancer	Oncology	31189035	736	Quality of life	The trial outcome index of the Functional Assessment of Cancer Therapy (FACT) for endometrial cancer (FACT-En)	8	5	29440	490.667
149	Adjuvant Chemotherapy plus Radiation for Locally Advanced Endometrial Cancer	Oncology	31189035	736	Chemotherapy-induced neurotoxic effects	The FACT/GOG–neurotoxicity (NTX) subscale	8	7.5	44160	736
149	Adjuvant Chemotherapy plus Radiation for Locally Advanced Endometrial Cancer	Oncology	31189035	736	Gastrointestinal symptoms	Two items from the FACT for colorectal cancer (FACT-C) combined with four items from the FACT-En Trial Outcome Index	8	15	88320	1472
150	Procalcitonin-Guided Treatment on Duration of Antibiotic Therapy and Cost in Septic Patients (PRODA): a Multi-Center Randomized Controlled Trial	Sepsis	30977312	52	Percentage of patients who had acute or recurrence of the initial infection	Chart review	1	1	52	0.866667
150	Procalcitonin-Guided Treatment on Duration of Antibiotic Therapy and Cost in Septic Patients (PRODA): a Multi-Center Randomized Controlled Trial	Sepsis	30977312	52	28 day mortality	Chart review	1	1	52	0.866667
150	Procalcitonin-Guided Treatment on Duration of Antibiotic Therapy and Cost in Septic Patients (PRODA): a Multi-Center Randomized Controlled Trial	Sepsis	30977312	52	In-hospital mortality	Chart review	1	1	52	0.866667
150	Procalcitonin-Guided Treatment on Duration of Antibiotic Therapy and Cost in Septic Patients (PRODA): a Multi-Center Randomized Controlled Trial	Sepsis	30977312	52	Length of stay in ICU and hospital	Chart review	1	1	52	0.866667
150	Procalcitonin-Guided Treatment on Duration of Antibiotic Therapy and Cost in Septic Patients (PRODA): a Multi-Center Randomized Controlled Trial	Sepsis	30977312	52	Costs of antibiotics and care for sepsis	Chart review	1	1	52	0.866667
151	Levothyroxine in Women with Thyroid Peroxidase Antibodies before Conception	Reproductive health	30907987	952	Clinical pregnancy at 7 weeks	Chart review	1	3	2856	47.6
151	Levothyroxine in Women with Thyroid Peroxidase Antibodies before Conception	Reproductive health	30907987	952	On-going pregnancy at 12 weeks	Chart review	1	3	2856	47.6
151	Levothyroxine in Women with Thyroid Peroxidase Antibodies before Conception	Reproductive health	30907987	952	Miscarriage <24 weeks	Chart review	1	3	2856	47.6
151	Levothyroxine in Women with Thyroid Peroxidase Antibodies before Conception	Reproductive health	30907987	952	Stillbirth (inter-uterine death >24 weeks)	Chart review	1	3	2856	47.6
151	Levothyroxine in Women with Thyroid Peroxidase Antibodies before Conception	Reproductive health	30907987	952	Ectopic pregnancy	Chart review	1	3	2856	47.6
151	Levothyroxine in Women with Thyroid Peroxidase Antibodies before Conception	Reproductive health	30907987	952	Termination (and reasons)	Chart review	1	3	2856	47.6
151	Levothyroxine in Women with Thyroid Peroxidase Antibodies before Conception	Reproductive health	30907987	952	Live birth <34 weeks	Chart review	1	3	2856	47.6
151	Levothyroxine in Women with Thyroid Peroxidase Antibodies before Conception	Reproductive health	30907987	952	Time from conception to pregnancy end (any reason)	Chart review	1	3	2856	47.6
151	Levothyroxine in Women with Thyroid Peroxidase Antibodies before Conception	Reproductive health	30907987	952	Mode of initiation of labour	Chart review	1	3	2856	47.6
151	Levothyroxine in Women with Thyroid Peroxidase Antibodies before Conception	Reproductive health	30907987	952	Mode of delivery	Chart review	1	3	2856	47.6
151	Levothyroxine in Women with Thyroid Peroxidase Antibodies before Conception	Reproductive health	30907987	952	Gestation at delivery, weeks	Chart review	1	3	2856	47.6
151	Levothyroxine in Women with Thyroid Peroxidase Antibodies before Conception	Reproductive health	30907987	952	Time from conception to live birth	Chart review	1	3	2856	47.6
151	Levothyroxine in Women with Thyroid Peroxidase Antibodies before Conception	Reproductive health	30907987	952	Birth weight, grams	Chart review	1	3	2856	47.6
151	Levothyroxine in Women with Thyroid Peroxidase Antibodies before Conception	Reproductive health	30907987	952	Small for gestational age and sex	Chart review	1	3	2856	47.6
151	Levothyroxine in Women with Thyroid Peroxidase Antibodies before Conception	Reproductive health	30907987	952	Large for gestational age and sex	Chart review	1	3	2856	47.6
151	Levothyroxine in Women with Thyroid Peroxidase Antibodies before Conception	Reproductive health	30907987	952	APGAR score	Chart review	1	3	2856	47.6
151	Levothyroxine in Women with Thyroid Peroxidase Antibodies before Conception	Reproductive health	30907987	952	Serum TSH concentration	Chart review	1	3	2856	47.6
151	Levothyroxine in Women with Thyroid Peroxidase Antibodies before Conception	Reproductive health	30907987	952	Serum Free T4 level	Chart review	1	3	2856	47.6
151	Levothyroxine in Women with Thyroid Peroxidase Antibodies before Conception	Reproductive health	30907987	952	Subclinical/overt hypothyroidism	Chart review	1	3	2856	47.6
151	Levothyroxine in Women with Thyroid Peroxidase Antibodies before Conception	Reproductive health	30907987	952	Subclinical/overt hyperthyroidism	Chart review	1	3	2856	47.6
151	Levothyroxine in Women with Thyroid Peroxidase Antibodies before Conception	Reproductive health	30907987	952	Maternal antenatal complications	Chart review	1	3	2856	47.6
151	Levothyroxine in Women with Thyroid Peroxidase Antibodies before Conception	Reproductive health	30907987	952	Intrapartum complications	Chart review	1	3	2856	47.6
151	Levothyroxine in Women with Thyroid Peroxidase Antibodies before Conception	Reproductive health	30907987	952	Maternal postnatal complications	Chart review	1	3	2856	47.6
151	Levothyroxine in Women with Thyroid Peroxidase Antibodies before Conception	Reproductive health	30907987	952	Neonatal complications	Chart review	1	3	2856	47.6
151	Levothyroxine in Women with Thyroid Peroxidase Antibodies before Conception	Reproductive health	30907987	952	Serious Adverse Events	Chart review	1	3	2856	47.6
152	Pre-pregnancy and early pregnancy calcium supplementation among women at high risk of pre-eclampsia: a multicentre, double-blind, randomised, placebo-controlled trial	Reproductive health	30696573	1355	Pre-eclampsia or pregnancy loss, or both, at any gestational age	Chart review	1	3	4065	67.75
152	Pre-pregnancy and early pregnancy calcium supplementation among women at high risk of pre-eclampsia: a multicentre, double-blind, randomised, placebo-controlled trial	Reproductive health	30696573	1355	Gestational hypertension (diastolic blood pressure >90 mm Hg on two occasions 4 h apart; or >110 mm Hg once, or systolic blood pressure >140 mm Hg on two occasions 4 h apart; or both, or >160 mm Hg once, after 20 weeks' gestation)	Chart review	1	3	4065	67.75
152	Pre-pregnancy and early pregnancy calcium supplementation among women at high risk of pre-eclampsia: a multicentre, double-blind, randomised, placebo-controlled trial	Reproductive health	30696573	1355	Gestational proteinuria (2 or more on urine dipstick, or >300 mg/24 h, or >500 mg/L or urinary protein: creatinine ratio >0·034 g/mmol, after 20 weeks' gestation	Chart review	1	3	4065	67.75
152	Pre-pregnancy and early pregnancy calcium supplementation among women at high risk of pre-eclampsia: a multicentre, double-blind, randomised, placebo-controlled trial	Reproductive health	30696573	1355	Pregnancy loss at any gestational age, including miscarriage and stillbirth, excluding requested abortion	Chart review	1	3	4065	67.75
152	Pre-pregnancy and early pregnancy calcium supplementation among women at high risk of pre-eclampsia: a multicentre, double-blind, randomised, placebo-controlled trial	Reproductive health	30696573	1355	No pregnancy during study period	Chart review	1	3	4065	67.75
152	Pre-pregnancy and early pregnancy calcium supplementation among women at high risk of pre-eclampsia: a multicentre, double-blind, randomised, placebo-controlled trial	Reproductive health	30696573	1355	Severe gestational hypertension	Chart review	1	3	4065	67.75
152	Pre-pregnancy and early pregnancy calcium supplementation among women at high risk of pre-eclampsia: a multicentre, double-blind, randomised, placebo-controlled trial	Reproductive health	30696573	1355	Severe pre-eclampsia (proteinuria plus severe diastolic [>110 mm Hg] or systolic [>160 mm Hg] hypertension)	Chart review	1	3	4065	67.75
152	Pre-pregnancy and early pregnancy calcium supplementation among women at high risk of pre-eclampsia: a multicentre, double-blind, randomised, placebo-controlled trial	Reproductive health	30696573	1355	Moderately severe thrombocytopenia (<100 × 109/L)	Chart review	1	3	4065	67.75
152	Pre-pregnancy and early pregnancy calcium supplementation among women at high risk of pre-eclampsia: a multicentre, double-blind, randomised, placebo-controlled trial	Reproductive health	30696573	1355	Uric acid more than reference values for gestational age	Chart review	1	3	4065	67.75
152	Pre-pregnancy and early pregnancy calcium supplementation among women at high risk of pre-eclampsia: a multicentre, double-blind, randomised, placebo-controlled trial	Reproductive health	30696573	1355	Renal failure (creatinine >120 mmol/L)	Chart review	1	3	4065	67.75
152	Pre-pregnancy and early pregnancy calcium supplementation among women at high risk of pre-eclampsia: a multicentre, double-blind, randomised, placebo-controlled trial	Reproductive health	30696573	1355	Liver failure (aspartate aminotransferase >70 U/L)	Chart review	1	3	4065	67.75
152	Pre-pregnancy and early pregnancy calcium supplementation among women at high risk of pre-eclampsia: a multicentre, double-blind, randomised, placebo-controlled trial	Reproductive health	30696573	1355	Eclampsia	Chart review	1	3	4065	67.75
152	Pre-pregnancy and early pregnancy calcium supplementation among women at high risk of pre-eclampsia: a multicentre, double-blind, randomised, placebo-controlled trial	Reproductive health	30696573	1355	Placental abruption	Chart review	1	3	4065	67.75
152	Pre-pregnancy and early pregnancy calcium supplementation among women at high risk of pre-eclampsia: a multicentre, double-blind, randomised, placebo-controlled trial	Reproductive health	30696573	1355	Pulmonary oedema	Chart review	1	3	4065	67.75
152	Pre-pregnancy and early pregnancy calcium supplementation among women at high risk of pre-eclampsia: a multicentre, double-blind, randomised, placebo-controlled trial	Reproductive health	30696573	1355	Stroke	Chart review	1	3	4065	67.75
152	Pre-pregnancy and early pregnancy calcium supplementation among women at high risk of pre-eclampsia: a multicentre, double-blind, randomised, placebo-controlled trial	Reproductive health	30696573	1355	Intensive care unit admission >24 h	Chart review	1	3	4065	67.75
152	Pre-pregnancy and early pregnancy calcium supplementation among women at high risk of pre-eclampsia: a multicentre, double-blind, randomised, placebo-controlled trial	Reproductive health	30696573	1355	HELLP syndrome	Chart review	1	3	4065	67.75
152	Pre-pregnancy and early pregnancy calcium supplementation among women at high risk of pre-eclampsia: a multicentre, double-blind, randomised, placebo-controlled trial	Reproductive health	30696573	1355	Maternal death	Chart review	1	3	4065	67.75
152	Pre-pregnancy and early pregnancy calcium supplementation among women at high risk of pre-eclampsia: a multicentre, double-blind, randomised, placebo-controlled trial	Reproductive health	30696573	1355	Participant hospital stay ≥7 days after childbirth	Chart review	1	3	4065	67.75
152	Pre-pregnancy and early pregnancy calcium supplementation among women at high risk of pre-eclampsia: a multicentre, double-blind, randomised, placebo-controlled trial	Reproductive health	30696573	1355	Caesarean section	Chart review	1	3	4065	67.75
152	Pre-pregnancy and early pregnancy calcium supplementation among women at high risk of pre-eclampsia: a multicentre, double-blind, randomised, placebo-controlled trial	Reproductive health	30696573	1355	Birthweight <2500 g	Chart review	1	3	4065	67.75
152	Pre-pregnancy and early pregnancy calcium supplementation among women at high risk of pre-eclampsia: a multicentre, double-blind, randomised, placebo-controlled trial	Reproductive health	30696573	1355	Preterm birth (<37 weeks' gestation)	Chart review	1	3	4065	67.75
152	Pre-pregnancy and early pregnancy calcium supplementation among women at high risk of pre-eclampsia: a multicentre, double-blind, randomised, placebo-controlled trial	Reproductive health	30696573	1355	Early preterm birth (<32 weeks' gestation)	Chart review	1	3	4065	67.75
152	Pre-pregnancy and early pregnancy calcium supplementation among women at high risk of pre-eclampsia: a multicentre, double-blind, randomised, placebo-controlled trial	Reproductive health	30696573	1355	Apgar score <7 at 5 min	Chart review	1	3	4065	67.75
152	Pre-pregnancy and early pregnancy calcium supplementation among women at high risk of pre-eclampsia: a multicentre, double-blind, randomised, placebo-controlled trial	Reproductive health	30696573	1355	Perinatal death or admission to neonatal intensive care unit for 24 h or more	Chart review	1	3	4065	67.75
152	Pre-pregnancy and early pregnancy calcium supplementation among women at high risk of pre-eclampsia: a multicentre, double-blind, randomised, placebo-controlled trial	Reproductive health	30696573	1355	Stillbirth	Chart review	1	3	4065	67.75
152	Pre-pregnancy and early pregnancy calcium supplementation among women at high risk of pre-eclampsia: a multicentre, double-blind, randomised, placebo-controlled trial	Reproductive health	30696573	1355	Pregnancy loss, stillbirth, or neonatal death before discharge	Chart review	1	3	4065	67.75
152	Pre-pregnancy and early pregnancy calcium supplementation among women at high risk of pre-eclampsia: a multicentre, double-blind, randomised, placebo-controlled trial	Reproductive health	30696573	1355	Pregnancy loss, stillbirth, or neonatal death before 6 weeks	Chart review	1	3	4065	67.75
152	Pre-pregnancy and early pregnancy calcium supplementation among women at high risk of pre-eclampsia: a multicentre, double-blind, randomised, placebo-controlled trial	Reproductive health	30696573	1355	Previous WHO calcium trial composites	Chart review	1	3	4065	67.75
153	White Sweet Potato as Meal Replacement for Overweight White-Collar Workers: A Randomized Controlled Trial	Obesity	30646532	60	Body height	Physical measures by trial staff	2	2	240	4
153	White Sweet Potato as Meal Replacement for Overweight White-Collar Workers: A Randomized Controlled Trial	Obesity	30646532	60	BMI	Physical measures by trial staff	2	0	0	0
153	White Sweet Potato as Meal Replacement for Overweight White-Collar Workers: A Randomized Controlled Trial	Obesity	30646532	60	Waist circumference	Physical measures by trial staff	2	0.5	60	1
153	White Sweet Potato as Meal Replacement for Overweight White-Collar Workers: A Randomized Controlled Trial	Obesity	30646532	60	Hip circumference	Physical measures by trial staff	2	0.5	60	1
153	White Sweet Potato as Meal Replacement for Overweight White-Collar Workers: A Randomized Controlled Trial	Obesity	30646532	60	Wrist circumference	Physical measures by trial staff	2	0.5	60	1
153	White Sweet Potato as Meal Replacement for Overweight White-Collar Workers: A Randomized Controlled Trial	Obesity	30646532	60	Calf circumference	Physical measures by trial staff	2	0.5	60	1
153	White Sweet Potato as Meal Replacement for Overweight White-Collar Workers: A Randomized Controlled Trial	Obesity	30646532	60	Mid-arm circumference	Physical measures by trial staff	2	0.5	60	1
153	White Sweet Potato as Meal Replacement for Overweight White-Collar Workers: A Randomized Controlled Trial	Obesity	30646532	60	Thigh circumference (ThC)	Physical measures by trial staff	2	0.5	60	1
153	White Sweet Potato as Meal Replacement for Overweight White-Collar Workers: A Randomized Controlled Trial	Obesity	30646532	60	Mid-arm muscle circumference	Physical measures by trial staff	2	0.5	60	1
153	White Sweet Potato as Meal Replacement for Overweight White-Collar Workers: A Randomized Controlled Trial	Obesity	30646532	60	Triceps skinfolds	Physical measures by trial staff	2	0.5	60	1
153	White Sweet Potato as Meal Replacement for Overweight White-Collar Workers: A Randomized Controlled Trial	Obesity	30646532	60	Blood pressure	Physical measures by trial staff	2	5	600	10
153	White Sweet Potato as Meal Replacement for Overweight White-Collar Workers: A Randomized Controlled Trial	Obesity	30646532	60	Pulse rate	Physical measures by trial staff	2	1	120	2
153	White Sweet Potato as Meal Replacement for Overweight White-Collar Workers: A Randomized Controlled Trial	Obesity	30646532	60	Insulin	From 4ml blood sample	2	0.4	48	0.8
153	White Sweet Potato as Meal Replacement for Overweight White-Collar Workers: A Randomized Controlled Trial	Obesity	30646532	60	Triglyceride	From 4ml blood sample	2	0.4	48	0.8
153	White Sweet Potato as Meal Replacement for Overweight White-Collar Workers: A Randomized Controlled Trial	Obesity	30646532	60	Total cholesterol	From 4ml blood sample	2	0.4	48	0.8
153	White Sweet Potato as Meal Replacement for Overweight White-Collar Workers: A Randomized Controlled Trial	Obesity	30646532	60	Aspartate transaminase	From 4ml blood sample	2	0.4	48	0.8
153	White Sweet Potato as Meal Replacement for Overweight White-Collar Workers: A Randomized Controlled Trial	Obesity	30646532	60	Alanine transaminase	From 4ml blood sample	2	0.4	48	0.8
153	White Sweet Potato as Meal Replacement for Overweight White-Collar Workers: A Randomized Controlled Trial	Obesity	30646532	60	Creatinine	From 4ml blood sample	2	0.4	48	0.8
153	White Sweet Potato as Meal Replacement for Overweight White-Collar Workers: A Randomized Controlled Trial	Obesity	30646532	60	Blood urea nitrogen	From 4ml blood sample	2	0.4	48	0.8
153	White Sweet Potato as Meal Replacement for Overweight White-Collar Workers: A Randomized Controlled Trial	Obesity	30646532	60	Uric acid	From 4ml blood sample	2	0.4	48	0.8
153	White Sweet Potato as Meal Replacement for Overweight White-Collar Workers: A Randomized Controlled Trial	Obesity	30646532	60	High-sensitivity C-reactive protein	From 4ml blood sample	2	0.4	48	0.8
153	White Sweet Potato as Meal Replacement for Overweight White-Collar Workers: A Randomized Controlled Trial	Obesity	30646532	60	LDL-C	From 4ml blood sample	2	0.4	48	0.8
153	White Sweet Potato as Meal Replacement for Overweight White-Collar Workers: A Randomized Controlled Trial	Obesity	30646532	60	HDL-C	From 4ml blood sample	2	0.4	48	0.8
153	White Sweet Potato as Meal Replacement for Overweight White-Collar Workers: A Randomized Controlled Trial	Obesity	30646532	60	Fasting blood glucose	One touch glucose monitor	2	2	240	4
154	Group singing improves depression and life quality in patients with stable COPD: a randomized community-based trial in China	Depression	30612266	60	Disease-specific quality of life	Clinical COPD Questionnaire	4	2	480	8
Core outcome set trials
Trial ID	Title of trial	Broad disease area	Pubmed ID (if available)	Number of participants randomised	Secondary outcome	Secondary outcome measurement instrument	Number of times measured	Time to collect (mins)	Total secondary outcome Time to collect for trial (mins)	Total secondary outcome Time to collect for trial (hours)
5	Direct comparison of treatment responses, remission rates, and drug adherence in patients with rheumatoid arthritis treated with adalimumab, etanercept, or infliximab: results from 8 years of surveillance of clinical practice in the DANBIO registry.	Rheumatoid arthritis	20039405	112	ACR20	ACR20	5	45	25200	420
5	Direct comparison of treatment responses, remission rates, and drug adherence in patients with rheumatoid arthritis treated with adalimumab, etanercept, or infliximab: results from 8 years of surveillance of clinical practice in the DANBIO registry.	Rheumatoid arthritis	20039405	112	ACR50	ACR50	5	45	25200	420
5	Direct comparison of treatment responses, remission rates, and drug adherence in patients with rheumatoid arthritis treated with adalimumab, etanercept, or infliximab: results from 8 years of surveillance of clinical practice in the DANBIO registry.	Rheumatoid arthritis	20039405	112	ACR70	ACR70	5	45	25200	420
6	Effects of Atorvastatin on Disease Activity and HDL Cholesterol Function in Patients With Rheumatoid Arthritis	Rheumatoid arthritis	17552046	20	Disease activity score	DAS28	5	0	0	0
6	Effects of Atorvastatin on Disease Activity and HDL Cholesterol Function in Patients With Rheumatoid Arthritis	Rheumatoid arthritis	17552046	20	Patient and physician global assessments	Visual analogue scale	5	3	300	5
6	Effects of Atorvastatin on Disease Activity and HDL Cholesterol Function in Patients With Rheumatoid Arthritis	Rheumatoid arthritis	17552046	20	Swollen and tender joint counts	Swollen and tender joint counts	5	7	700	11.6667
6	Effects of Atorvastatin on Disease Activity and HDL Cholesterol Function in Patients With Rheumatoid Arthritis	Rheumatoid arthritis	17552046	20	Pain	Patient visual analogue scale	5	3	300	5
6	Effects of Atorvastatin on Disease Activity and HDL Cholesterol Function in Patients With Rheumatoid Arthritis	Rheumatoid arthritis	17552046	20	Erythrocyte sedimentation rate (Westergren)	Blood draw	5	3.5	350	5.83333
6	Effects of Atorvastatin on Disease Activity and HDL Cholesterol Function in Patients With Rheumatoid Arthritis	Rheumatoid arthritis	17552046	20	Cholesterol levels	Blood draw	5	3.5	350	5.83333
6	Effects of Atorvastatin on Disease Activity and HDL Cholesterol Function in Patients With Rheumatoid Arthritis	Rheumatoid arthritis	17552046	20	Health assessment	HAQ-DI	5	5	500	8.33333
7	A Comparison of Methotrexate Alone or Combined to Infliximab or to Pulse Methylprednisolone in Early Rheumatoid Arthritis: A Magnetic Resonance Imaging Study	Rheumatoid arthritis	18050189	44	Efficacy	DAS score, ACR response	8	58.5	20592	343.2
7	A Comparison of Methotrexate Alone or Combined to Infliximab or to Pulse Methylprednisolone in Early Rheumatoid Arthritis: A Magnetic Resonance Imaging Study	Rheumatoid arthritis	18050189	44	Side effects	Patient self-report	8	2	704	11.7333
9	Treatment of Early RA: Minocycline in Combination With Methotrexate vs Methotrexate Alone	Rheumatoid arthritis		91	20% improvement according to ACR criteria	ACR20	7	45	28665	477.75
9	Treatment of Early RA: Minocycline in Combination With Methotrexate vs Methotrexate Alone	Rheumatoid arthritis		91	70% improvement according to ACR criteria	ACR70	7	45	28665	477.75
11	Comparison of MTX+ anti-TNF to MTX+ conventional DMARDs in patients with early rheumatoid arthritis who failed MTX alone	Rheumatoid arthritis	21149498	487	Simple Disease Activity Index (SDAI)	A composite of tender and swollen joint count (based on a 28-joint assessment); patient and physician global assessment of disease activity [visual analogue scale (VAS) 0–10 cm]; level of C-reactive protein (mg/dl, normal <1 mg/dl).	2	0.333	324.342	5.4057
11	Comparison of MTX+ anti-TNF to MTX+ conventional DMARDs in patients with early rheumatoid arthritis who failed MTX alone	Rheumatoid arthritis	21149498	487	Clinical Disease Activity Index (CDAI)	A composite of the sum of tender and swollen joint counts [28 joints] and patient and physician global assessments [in cm)	2	0	0	0
12	Switching Anti-TNF-Alpha Agents in Rheumatoid Arthritis (RA)	Rheumatoid arthritis		13	Participants With a Disease Activity Score Using C-reactive Protein (DAS28[CRP]) Value <= 3.2	DAS28	1	13.5	175.5	2.925
12	Switching Anti-TNF-Alpha Agents in Rheumatoid Arthritis (RA)	Rheumatoid arthritis		13	Participants With a Disease Activity Score Using C-reactive Protein (DAS28[CRP]) Value < 2.6	DAS28	1	13.5	175.5	2.925
12	Switching Anti-TNF-Alpha Agents in Rheumatoid Arthritis (RA)	Rheumatoid arthritis		13	Participants With a Decrease in Disease Activity Score Using C-reactive Protein (DAS28[CRP]) Value of >1.2 From Baseline to Week 12 (European League Against Rheumatism (EULAR) Definition of a Moderate Response)	DAS28	1	13.5	175.5	2.925
12	Switching Anti-TNF-Alpha Agents in Rheumatoid Arthritis (RA)	Rheumatoid arthritis		13	Participants With an ACR 20 Response at Week 12	ACR20	1	45	585	9.75
12	Switching Anti-TNF-Alpha Agents in Rheumatoid Arthritis (RA)	Rheumatoid arthritis		13	Participants With an ACR 50 Response at Week 12	ACR50	1	45	585	9.75
12	Switching Anti-TNF-Alpha Agents in Rheumatoid Arthritis (RA)	Rheumatoid arthritis		13	Participants With an ACR 70 Response at Week 12	ACR70	1	45	585	9.75
30	TNF-blocking Therapy in Combination With Disease-modifying Antirheumatic Drugs in Early Rheumatoid Arthritis (NEO-RACo)	Rheumatoid arthritis	25274892	99	Radiology	X-ray	3	10	2970	49.5
31	Success of Tocilizumab in RA Patients With Remission Induction and Sustained Efficacy After Discontinuation (SURPRISE)	Rheumatoid arthritis	5099201	233	Change in TSS score	TSS score	2	10	4660	77.6667
31	Success of Tocilizumab in RA Patients With Remission Induction and Sustained Efficacy After Discontinuation (SURPRISE)	Rheumatoid arthritis	5099201	233	Change of DAS28-ESR remission rate	DAS28	5	1	1165	19.4167
31	Success of Tocilizumab in RA Patients With Remission Induction and Sustained Efficacy After Discontinuation (SURPRISE)	Rheumatoid arthritis	5099201	233	Change of ACR response rate	Composite measure defined as both improvement of X% in the number of tender and number of swollen joints, and a 20% improvement in three of the following five criteria: patient global assessment, physician global assessment, functional ability measure [mo	5	1	1165	19.4167
31	Success of Tocilizumab in RA Patients With Remission Induction and Sustained Efficacy After Discontinuation (SURPRISE)	Rheumatoid arthritis	5099201	233	EQ5D scores over time	EQ5D	5	1	1165	19.4167
31	Success of Tocilizumab in RA Patients With Remission Induction and Sustained Efficacy After Discontinuation (SURPRISE)	Rheumatoid arthritis	5099201	233	J-HAQ/HAQ scores over time	HAQ score	5	1	1165	19.4167
31	Success of Tocilizumab in RA Patients With Remission Induction and Sustained Efficacy After Discontinuation (SURPRISE)	Rheumatoid arthritis	5099201	233	SDAI, CDAI, and Boolean remission rates	Simple Disease Activity Index (SDAI), Clinical Disease Activity Index (CDAI)	5	1	1165	19.4167
31	Success of Tocilizumab in RA Patients With Remission Induction and Sustained Efficacy After Discontinuation (SURPRISE)	Rheumatoid arthritis	5099201	233	TNF-α over time	Blood draw	3	7.5	5242.5	87.375
31	Success of Tocilizumab in RA Patients With Remission Induction and Sustained Efficacy After Discontinuation (SURPRISE)	Rheumatoid arthritis	5099201	233	Between-group comparison of the discontinuation rate after an achievement of remission	The SURPRISE study consisted of two parts; the first year compared MTX+TCZ vs TCZ monotherapy, and the second year compared the remission rates after tocilizumab discontinuation in patients who were in remission at the end of the first year (ie MTX vs no	5	1	1165	19.4167
31	Success of Tocilizumab in RA Patients With Remission Induction and Sustained Efficacy After Discontinuation (SURPRISE)	Rheumatoid arthritis	5099201	233	Factor analysis of patients maintaining discontinuation	The SURPRISE study consisted of two parts; the first year compared MTX+TCZ vs TCZ monotherapy, and the second year compared the remission rates after tocilizumab discontinuation in patients who were in remission at the end of the first year (ie MTX vs no	5	1	1165	19.4167
31	Success of Tocilizumab in RA Patients With Remission Induction and Sustained Efficacy After Discontinuation (SURPRISE)	Rheumatoid arthritis	5099201	233	Time course of DAS28 after restarting TCZ (between-group comparison)	DAS28	5	1	1165	19.4167
31	Success of Tocilizumab in RA Patients With Remission Induction and Sustained Efficacy After Discontinuation (SURPRISE)	Rheumatoid arthritis	5099201	233	Time course of DAS28 after restarting MTX following suspension of discontinuation in the TCZ monotherapy group in Step 1	DAS28	5	1	1165	19.4167
32	Spacing of TNF-blocker Injections in Rheumatoid Arthritis Study (STRASS)	Rheumatoid arthritis	26103979	137	RA inflammatory activity over 18 months	Estimated by DAS44 repeated measures	6	25	20550	342.5
32	Spacing of TNF-blocker Injections in Rheumatoid Arthritis Study (STRASS)	Rheumatoid arthritis	26103979	137	Relapse rate over 18 months	Based on Kaplan Meier survival analysis	1	6.75	924.75	15.4125
32	Spacing of TNF-blocker Injections in Rheumatoid Arthritis Study (STRASS)	Rheumatoid arthritis	26103979	137	Functional impairment	HAQ score	6	5	4110	68.5
32	Spacing of TNF-blocker Injections in Rheumatoid Arthritis Study (STRASS)	Rheumatoid arthritis	26103979	137	Health-related quality of life	SF36	6	8.75	7192.5	119.875
32	Spacing of TNF-blocker Injections in Rheumatoid Arthritis Study (STRASS)	Rheumatoid arthritis	26103979	137	Utility	EQ5D	6	7.5	6165	102.75
32	Spacing of TNF-blocker Injections in Rheumatoid Arthritis Study (STRASS)	Rheumatoid arthritis	26103979	137	Structural damage progression over 18 months	Assessed with the van der HEIJDE-modified Sharp score (SHS)	2	25	6850	114.167
33	Optimal management of rheumatoid arthritis patients requiring biologic therapy (ORBIT)	Rheumatoid arthritis	27197690	295	Mean change in health assessment questionaire score	HAQ score	4	5	5900	98.3333
33	Optimal management of rheumatoid arthritis patients requiring biologic therapy (ORBIT)	Rheumatoid arthritis	27197690	295	Mean change in EQ5-D	EQ5D	4	12.5	14750	245.833
33	Optimal management of rheumatoid arthritis patients requiring biologic therapy (ORBIT)	Rheumatoid arthritis	27197690	295	Mean QALY gain	From EQ5D	0	0	0	0
34	Effectiveness in daily practice of different treatment strategies for early rheumatoid arthritis	Rheumatoid arthritis	27432356	379	Remission according to simplified disease activity index at week 16	SDAI (incudes number of tender joints TJC, number of swollen joints SJC, and general health of patient assessed on a visual analogue scale)	1	5	1895	31.5833
34	Effectiveness in daily practice of different treatment strategies for early rheumatoid arthritis	Rheumatoid arthritis	27432356	379	Remission according to simplified disease activity index at week 52	SDAI (incudes number of tender joints TJC, number of swollen joints SJC, and general health of patient assessed on a visual analogue scale)	1	5	1895	31.5833
34	Effectiveness in daily practice of different treatment strategies for early rheumatoid arthritis	Rheumatoid arthritis	27432356	379	Remission according to simplified disease activity index at week 104	SDAI (incudes number of tender joints TJC, number of swollen joints SJC, and general health of patient assessed on a visual analogue scale)	1	5	1895	31.5833
34	Effectiveness in daily practice of different treatment strategies for early rheumatoid arthritis	Rheumatoid arthritis	27432356	379	Clinically significant change in health assessment questionnaire	HAQ score	2	5	3790	63.1667
35	Improvement in insulin resistance is greater when infliximab is added to methotrexate during intensive treatment of early rheumatoid arthritis-results from the IDEA study.	Rheumatoid arthritis	27638812	79	Number of patients having a major clinical response	DAS28	1	13.5	1066.5	17.775
35	Improvement in insulin resistance is greater when infliximab is added to methotrexate during intensive treatment of early rheumatoid arthritis-results from the IDEA study.	Rheumatoid arthritis	27638812	79	Change in Sharpe van der Heijde scores between baselines, 26 and 72 week hand and feet x-rays	Sharpe van der Heijde score	3	25	5925	98.75
35	Improvement in insulin resistance is greater when infliximab is added to methotrexate during intensive treatment of early rheumatoid arthritis-results from the IDEA study.	Rheumatoid arthritis	27638812	79	Number of patients in clinical remission at 78 weeks	DAS28	1	13.5	1066.5	17.775
35	Improvement in insulin resistance is greater when infliximab is added to methotrexate during intensive treatment of early rheumatoid arthritis-results from the IDEA study.	Rheumatoid arthritis	27638812	79	Number of patients in infliximab free remission	DAS28	1	13.5	1066.5	17.775
35	Improvement in insulin resistance is greater when infliximab is added to methotrexate during intensive treatment of early rheumatoid arthritis-results from the IDEA study.	Rheumatoid arthritis	27638812	79	Number of patients in clinical remission at 26 weeks	DAS28	1	13.5	1066.5	17.775
35	Improvement in insulin resistance is greater when infliximab is added to methotrexate during intensive treatment of early rheumatoid arthritis-results from the IDEA study.	Rheumatoid arthritis	27638812	79	Quality of life	RA Quality of Life questionnaire	1	6	474	7.9
35	Improvement in insulin resistance is greater when infliximab is added to methotrexate during intensive treatment of early rheumatoid arthritis-results from the IDEA study.	Rheumatoid arthritis	27638812	79	Health assessment	HAQ score	1	5	395	6.58333
35	Improvement in insulin resistance is greater when infliximab is added to methotrexate during intensive treatment of early rheumatoid arthritis-results from the IDEA study.	Rheumatoid arthritis	27638812	79	Immunogenetic studies to predict long-term immune response	Blood draw	1	3.5	276.5	4.60833
35	Improvement in insulin resistance is greater when infliximab is added to methotrexate during intensive treatment of early rheumatoid arthritis-results from the IDEA study.	Rheumatoid arthritis	27638812	79	Immune phenotyping (flow cytometry) and assessment of immune effector & regulatory functions	Blood draw	1	3.5	276.5	4.60833
36	Study of Two Different Starting Doses of Methotrexate When Starting Treatment in Rheumatoid Arthritis (DMIRA)	Rheumatoid arthritis	24976447	100	Proportion Requiring Stoppage/Decrease/Inability to Hike MTX Due to Cytopenia or Transaminitis	SGOT or SGPT More Than 80IU - blood draw	1	3.5	350	5.83333
37	Study of Different Doses of Folic Acid in Combination With Methotrexate in Rheumatoid Arthritis (FOLVARI)	Rheumatoid arthritis	26063325	100	RBC folic acid	Blood draw	2	5	1000	16.6667
37	Study of Different Doses of Folic Acid in Combination With Methotrexate in Rheumatoid Arthritis (FOLVARI)	Rheumatoid arthritis	26063325	100	Function	Indian Health Assessment Questionnaire	2	10	2000	33.3333
38	Leflunomide Versus Sulfasalazine/Methotrexate in Rheumatoid Arthritis:an Ultrasound/Magnetic Resonance Imaging Study	Rheumatoid arthritis		1	MRI bone marrow edema score	MRI scan	1	0	0	0
38	Leflunomide Versus Sulfasalazine/Methotrexate in Rheumatoid Arthritis:an Ultrasound/Magnetic Resonance Imaging Study	Rheumatoid arthritis		1	MRI erosion score	MRI scan	1	0	0	0
38	Leflunomide Versus Sulfasalazine/Methotrexate in Rheumatoid Arthritis:an Ultrasound/Magnetic Resonance Imaging Study	Rheumatoid arthritis		1	US synovitis score	Ultrasound scan	1	45	45	0.75
38	Leflunomide Versus Sulfasalazine/Methotrexate in Rheumatoid Arthritis:an Ultrasound/Magnetic Resonance Imaging Study	Rheumatoid arthritis		1	Clinical outcomes	Swollen/Tender joint counts, investigator's global assessment of disease activity (0-10), patient's assessment of disease activity (0-10), pain assessment by visual analogue scale (0-10), erythrocyte sedimentation rate, duration (mins) of early morning st	1	45	45	0.75
39	RA Denosumab on bone microstructure study	Rheumatoid arthritis		40	Changes from baseline in trabecular bone microarchitecture at distal radius at 6th month	HRpqCT scan (this scan gave primary outcome and 3 secondary outcomes so timing has been split across accordingly)	1	1	40	0.666667
39	RA Denosumab on bone microstructure study	Rheumatoid arthritis		40	Changes from baseline in bone volumetric density at the 2nd metacarpal bone at 6th month	HRpqCT scan (this scan gave primary outcome and 3 secondary outcomes so timing has been split across accordingly)	1	1	40	0.666667
39	RA Denosumab on bone microstructure study	Rheumatoid arthritis		40	Changes from baseline in trabecular bone microarchitecture at 2nd metacarpal bone at 6th month	HRpqCT scan (this scan gave primary outcome and 3 secondary outcomes so timing has been split across accordingly)	1	1	40	0.666667
39	RA Denosumab on bone microstructure study	Rheumatoid arthritis		40	Changes from baseline in areal bone density at total hip at 6th month	DXA scan	1	6.66	266.4	4.44
39	RA Denosumab on bone microstructure study	Rheumatoid arthritis		40	Changes from baseline in areal bone density at lumbar spine at 6th month	DXA scan	1	6.66	266.4	4.44
39	RA Denosumab on bone microstructure study	Rheumatoid arthritis		40	Changes in areal bone density at distal radius at 6th month	DXA scan	1	6.66	266.4	4.44
39	RA Denosumab on bone microstructure study	Rheumatoid arthritis		40	Changes from baseline in bone volumetric density at distal radius at 3rd month	HRpqCT scan	1	1	40	0.666667
39	RA Denosumab on bone microstructure study	Rheumatoid arthritis		40	Changes from baseline in trabecular bone microarchitecture at distal radius at 3rd month	HRpqCT scan	1	1	40	0.666667
39	RA Denosumab on bone microstructure study	Rheumatoid arthritis		40	Changes from baseline in bone volumetric density at the 2nd metacarpal bone at 3rd month	HRpqCT scan	1	1	40	0.666667
39	RA Denosumab on bone microstructure study	Rheumatoid arthritis		40	Changes from baseline in trabecular bone microarchitecture at 2nd metacarpal bone at 3rd month	HRpqCT scan	1	1	40	0.666667
39	RA Denosumab on bone microstructure study	Rheumatoid arthritis		40	Changes from baseline in areal bone density at total hip at 3rd month	DXA scan	1	6.66	266.4	4.44
39	RA Denosumab on bone microstructure study	Rheumatoid arthritis		40	Changes from baseline in areal bone density at lumbar spine at 3rd month	DXA scan	1	6.66	266.4	4.44
39	RA Denosumab on bone microstructure study	Rheumatoid arthritis		40	Changes in areal bone density at distal radius at 3rd month	DXA scan	1	6.66	266.4	4.44
161	Combination Treatment With Methotrexate, Cyclosporine, and Intraarticular Betamethasone Compared With Methotrexate and Intraarticular Betamethasone in Early Active Rheumatoid Arthritis Early Active Rheumatoid Arthritis	Rheumatoid Arthritis	16645967	160	ACR remission (modified)	Defined according to the ACR criteria for remission in RA, also defined according to DAS28	2	58.5	18720	312
161	Combination Treatment With Methotrexate, Cyclosporine, and Intraarticular Betamethasone Compared With Methotrexate and Intraarticular Betamethasone in Early Active Rheumatoid Arthritis Early Active Rheumatoid Arthritis	Rheumatoid Arthritis	16645967	160	ACR50 response	ACR50	3	45	21600	360
161	Combination Treatment With Methotrexate, Cyclosporine, and Intraarticular Betamethasone Compared With Methotrexate and Intraarticular Betamethasone in Early Active Rheumatoid Arthritis Early Active Rheumatoid Arthritis	Rheumatoid Arthritis	16645967	160	ACR70 response	ACR70	3	45	21600	360
161	Combination Treatment With Methotrexate, Cyclosporine, and Intraarticular Betamethasone Compared With Methotrexate and Intraarticular Betamethasone in Early Active Rheumatoid Arthritis Early Active Rheumatoid Arthritis	Rheumatoid Arthritis	16645967	160	Radiographic outcome	Change in the Larsen score from baseline	3	5	2400	40
Public health trials
Trial ID	Title of trial	Broad disease area	Pubmed ID (if available)	Number of participants randomised	Secondary outcome	Secondary outcome measurement instrument	Number of times measured	Time to collect (mins)	Total secondary outcome Time to collect for trial (mins)	Total secondary outcome Time to collect for trial (hours)
1	PRENACEL - a mHealth messaging system to complement antenatal care: a cluster randomized trial	Antenatal care	29116028	1210	Coverage of recommended practices	Review of the ANC scores from antenatal cards to produce coverage of recommended practices	1	25	30250	504.167
2	Effects of web-based stress and depression literacy intervention on improving symptoms and knowledge of depression among workers: A randomized controlled trial	Depression	27280960	1236	Psychological distress	Kessler's Psychological Distress Scale (K6)	3	2	7416	123.6
2	Effects of web-based stress and depression literacy intervention on improving symptoms and knowledge of depression among workers: A randomized controlled trial	Depression	27280960	1236	Improvement in knowledge	4 questions each with 5 response options on a Likert scale	3	10	37080	618
2	Effects of web-based stress and depression literacy intervention on improving symptoms and knowledge of depression among workers: A randomized controlled trial	Depression	27280960	1236	Demographics	Age, gender, marital status, occupation, and education	3	5	18540	309
3	Theory-based modifications of an advanced notification letter improves screening for bowel cancer in men: A randomised controlled trial	Cancer screening	27485727	9216	Change in psychosocial variables	Behavioural questionnaire	2	20	368640	6144
13	A randomized, controlled trial to increase discussion of breast cancer in primary care	Cancer	24762560	1635	Percentage of participants with correct perception risk	Survey	2	3.5	11445	190.75
13	A randomized, controlled trial to increase discussion of breast cancer in primary care	Cancer	24762560	1635	Percentage of patients who had a discussion of breast cancer risk	Survey	2	3.5	11445	190.75
15	Metabolic syndrome from adolescence to early adulthood: effect of infancy-onset dietary counseling of low saturated fat: the Special Turku Coronary Risk Factor Intervention Project (STRIP)	Nutrition	2566600	1062	Growth and development	Height measurement, weight measurement, waist circumference measurement	6	5	31860	531
15	Metabolic syndrome from adolescence to early adulthood: effect of infancy-onset dietary counseling of low saturated fat: the Special Turku Coronary Risk Factor Intervention Project (STRIP)	Nutrition	2566600	1062	Physical activity level and fitness	Blood pressure measurement	6	10	63720	1062
15	Metabolic syndrome from adolescence to early adulthood: effect of infancy-onset dietary counseling of low saturated fat: the Special Turku Coronary Risk Factor Intervention Project (STRIP)	Nutrition	2566600	1062	Intima-media thickness of arteries and rate of NO-induced vasodilation	Blood draw	6	1.666	10615.8	176.929
16	Effectiveness of a group diabetes education programme in under-served communities in South Africa: a pragmatic cluster randomized controlled trial	Diabetes	24766179	1570	Self-efficacy	A simple measure of diabetic self-efficacy developed by Stanford University's study on Diabetes Self-Management (https://www.selfmanagementresource.com/docs/pdfs/English_-_self-efficacy_diabetes.pdf)?	2	5.5	17270	287.833
16	Effectiveness of a group diabetes education programme in under-served communities in South Africa: a pragmatic cluster randomized controlled trial	Diabetes	24766179	1570	Locus of control	Questionnaire (https://www.ncbi.nlm.nih.gov/pubmed/16523190)	2	6.5	20410	340.167
16	Effectiveness of a group diabetes education programme in under-served communities in South Africa: a pragmatic cluster randomized controlled trial	Diabetes	24766179	1570	Mean blood pressure	Omron digital blood pressure monitor	2	9	28260	471
16	Effectiveness of a group diabetes education programme in under-served communities in South Africa: a pragmatic cluster randomized controlled trial	Diabetes	24766179	1570	Mean weight loss	Electronic scales	2	1	3140	52.3333
16	Effectiveness of a group diabetes education programme in under-served communities in South Africa: a pragmatic cluster randomized controlled trial	Diabetes	24766179	1570	Mean waist circumference	Tape measure	2	1.25	3925	65.4167
16	Effectiveness of a group diabetes education programme in under-served communities in South Africa: a pragmatic cluster randomized controlled trial	Diabetes	24766179	1570	Mean HbA1c	One blood sample provides this and cholesterol so I've split the 6 minute time estimate to give 3 minutes per outcome	2	3	9420	157
16	Effectiveness of a group diabetes education programme in under-served communities in South Africa: a pragmatic cluster randomized controlled trial	Diabetes	24766179	1570	Mean total cholesterol	One blood sample provides this and HbA1c so I've split the 6 minute time estimate to give 3 minutes per outcome	2	3	9420	157
16	Effectiveness of a group diabetes education programme in under-served communities in South Africa: a pragmatic cluster randomized controlled trial	Diabetes	24766179	1570	Quality of life	Physical, role, social functioning, mental status, health status and pain	2	7.5	23550	392.5
17	Improving feeding and growth of HIV-positive children through nutrition training of frontline health workers in Tanga, Tanzania	Nutrition	28376725	776	Nutrition status	Weight, height and mid upper arm circumference	13	12	121056	2017.6
17	Improving feeding and growth of HIV-positive children through nutrition training of frontline health workers in Tanga, Tanzania	Nutrition	28376725	776	ART profile	Adherence, viral load, CD4 count, opportunistic infections	13	12	121056	2017.6
18	Family-centered brief intervention for reducing obesity and cardiovascular disease risk: A randomized controlled trial	Obesity	27616217	320	Cardiovascular risk	Change in the 5 year risk of a cardiovascular event as defined by the Framingham equation	3	20	19200	320
19	Effectiveness of a walking programme to support adults with intellectual disabilities to increase physical activity: walk well cluster-randomised controlled trial.	Physical activity	26416606	102	Average number of minutes spent in moderate - vigorous physical activity per day using the International Physical Activity Questionnaire-Short version.	Accelerometer data, and International Physical Activity Questionnaire-Short version	3	85	26010	433.5
19	Effectiveness of a walking programme to support adults with intellectual disabilities to increase physical activity: walk well cluster-randomised controlled trial.	Physical activity	26416606	102	Average number of minutes spent in physical activity of any intensity per day using the International Physical Activity Questionnaire-Short version	International Physical Activity Questionnaire-Short version	3	0	0	0
19	Effectiveness of a walking programme to support adults with intellectual disabilities to increase physical activity: walk well cluster-randomised controlled trial.	Physical activity	26416606	102	Average time spent on sedentary behaviour per day	Accelerometer data, and International Physical Activity Questionnaire-Short version	3	0	0	0
19	Effectiveness of a walking programme to support adults with intellectual disabilities to increase physical activity: walk well cluster-randomised controlled trial.	Physical activity	26416606	102	Quality of life	EQ5D	3	7.5	2295	38.25
19	Effectiveness of a walking programme to support adults with intellectual disabilities to increase physical activity: walk well cluster-randomised controlled trial.	Physical activity	26416606	102	Weight, body mass index and waist circumference	Weight, height and waist circumference	3	5	1530	25.5
20	Intervention of childhood and adolescents obesity in Shantou city	Obesity	25596004	41	Body composition measurements	Physical measures by trial staff	2	30	2460	41
20	Intervention of childhood and adolescents obesity in Shantou city	Obesity	25596004	41	Laboratory indicators	Blood draw	2	3.5	287	4.78333
20	Intervention of childhood and adolescents obesity in Shantou city	Obesity	25596004	41	Questionnaire score	Questionnaire	2	10	820	13.6667
20	Intervention of childhood and adolescents obesity in Shantou city	Obesity	25596004	41	Piers-Harris Child's self-concept scale	Piers-Harris Child's self-concept scale	2	12.5	1025	17.0833
21	A block randomized controlled trial of a brief smoking cessation counselling and advice through short message service on participants who joined the Quit to Win Contest in Hong Kong	Smoking cessation	26116584	1003	Self-reported 7-day PP tobacco abstinence	Follow up survey conducted by telephone interviewers (collecting primary outcome and two secondary outcomes)	3	3	9027	150.45
21	A block randomized controlled trial of a brief smoking cessation counselling and advice through short message service on participants who joined the Quit to Win Contest in Hong Kong	Smoking cessation	26116584	1003	Biochemically validated tobacco abstinence	Exhaled CO and saliva cotinine assessment	3	10	30090	501.5
21	A block randomized controlled trial of a brief smoking cessation counselling and advice through short message service on participants who joined the Quit to Win Contest in Hong Kong	Smoking cessation	26116584	1003	Reduction in daily cigarette consumption (reduction rate)	Follow up survey conducted by telephone interviewers (collecting primary outcome and two secondary outcomes)	3	3	9027	150.45
22	Brief report: A randomized controlled trial examining peer support and behavioral weight loss treatment	Obesity	26265590	41	Adherence to the program	1) total food diaries turned in by participants, 2) total face-to-face sessions attended, and 3) total number of chats/check-ins between participants and with the group leader	3	12.5	1537.5	25.625
22	Brief report: A randomized controlled trial examining peer support and behavioral weight loss treatment	Obesity	26265590	41	Anthropometric measures	Body weight (calibrated digital scale) and height measurement (wall mounted stadiometer)	3	2	246	4.1
22	Brief report: A randomized controlled trial examining peer support and behavioral weight loss treatment	Obesity	26265590	41	Dietary intake	Block Kids Food Frequency Questionnaire 2004 (FFQ)	3	15	1845	30.75
22	Brief report: A randomized controlled trial examining peer support and behavioral weight loss treatment	Obesity	26265590	41	Physical activity	MTI/Actigraph uniaxial accelerometer	3	3	369	6.15
24	Self-Expansion is Associated with Better Adherence and Obesity Treatment Outcomes in Adults	Obesity	27436226	268	Demographics	Questions on gender, age, race and education	1	1	268	4.46667
24	Self-Expansion is Associated with Better Adherence and Obesity Treatment Outcomes in Adults	Obesity	27436226	268	Height measurement	Height measurement	1	3	804	13.4
24	Self-Expansion is Associated with Better Adherence and Obesity Treatment Outcomes in Adults	Obesity	27436226	268	Self-expansion	4 questions based on a shortened version of the 14-item Self-Expansion scale	2	1	536	8.93333
24	Self-Expansion is Associated with Better Adherence and Obesity Treatment Outcomes in Adults	Obesity	27436226	268	Treatment adherence	Web-based information provided by participants	12	10	32160	536
24	Self-Expansion is Associated with Better Adherence and Obesity Treatment Outcomes in Adults	Obesity	27436226	268	Physical activity	Paffenbarger Physical Activity Questionnaire	2	6.5	3484	58.0667
25	The Effectiveness of a Web-Based Computer-Tailored Intervention on Workplace Sitting: A Randomized Controlled Trial	Workplace health promotion	27245789	213	Activity	Activity monitor (activPAL)	3	5	3195	53.25
25	The Effectiveness of a Web-Based Computer-Tailored Intervention on Workplace Sitting: A Randomized Controlled Trial	Workplace health promotion	27245789	213	Activity	Day log	3	7.5	4792.5	79.875
26	Effects of Awareness Material on Suicide-Related Knowledge and the Intention to Provide Adequate Help to Suicidal Individuals	Suicide prevention	28793816	273	Enjoyment	Online questionnaire (collecting two primary and two secondary outcomes)	1	1	273	4.55
26	Effects of Awareness Material on Suicide-Related Knowledge and the Intention to Provide Adequate Help to Suicidal Individuals	Suicide prevention	28793816	273	Perceived knowledge gain	Online questionnaire (collecting two primary and two secondary outcomes)	1	1	273	4.55
27	A Computerized Lifestyle Application to Promote Multiple Health Behaviors at the Workplace: Testing Its Behavioral and Psychological Effects	Workplace health promotion	26429115	560	Combined health lifestyle indicator	Using the thresholds of 90-minute physical activity per week and 2 portions of fruits and vegetables	2	0	0	0
27	A Computerized Lifestyle Application to Promote Multiple Health Behaviors at the Workplace: Testing Its Behavioral and Psychological Effects	Workplace health promotion	26429115	560	Workplace demands in terms of physical activity	Assessed by instructing participants to think about the last weeks on their job and to rate whether they had performed physical activity for at least 30 minutes at work for at least three to five times a week	2	1.5	1680	28
27	A Computerized Lifestyle Application to Promote Multiple Health Behaviors at the Workplace: Testing Its Behavioral and Psychological Effects	Workplace health promotion	26429115	560	Sociodemographic characteristics and body weight	Weight measurement and self-report of demographics	2	2	2240	37.3333
29	Motivational interviewing and self-determination theory in a web-based computer tailored physical activity intervention: A randomized controlled trial	Physical activity	26849996	4302	Demographics	Questionnaire - age, weight, height, relational status and highest completed educational level	1	30	129060	2151
29	Motivational interviewing and self-determination theory in a web-based computer tailored physical activity intervention: A randomized controlled trial	Physical activity	26849996	4302	Physical activity intention	3 questions	1	15	64530	1075.5
29	Motivational interviewing and self-determination theory in a web-based computer tailored physical activity intervention: A randomized controlled trial	Physical activity	26849996	4302	Process evaluation	7 point scale of how useful, understandable, trustworthy, personally relevant and motivating they perceived the content of the sessions/tailored advice to be	2	5	43020	717
29	Motivational interviewing and self-determination theory in a web-based computer tailored physical activity intervention: A randomized controlled trial	Physical activity	26849996	4302	Self determination theory measures	Exercise self-regulation questionnaire and the intrinsic motivation inventory	2	25	215100	3585

## Sheet: Analysis
Phase 3 trials
Trial ID	Total secondary outcome Time to collect for trial (mins)	Total secondary outcome Time to collect for trial (hours)		Analysis for Phase 3 trials in minutes			Analysis for Phase 3 trials in hours
41	40800	680
42	3154	52.5667		Min	0		Min	0
43	828	13.8		Q1	2950		Q1	49.1667
44	18324	305.4		Median	9984		Median	166.4
45	13875	231.25		Q3	31350.5		Q3	522.508
47	4276	71.2667		Max	81409972		Max	1.35683e+06
48	859299	14321.6		Mean	858700		Mean	14311.7
49	0	0		IQR	28400.5		IQR	473.342
50	17820	297		Lower limit	-39650.8		Lower limit	-660.846
51	4760	79.3333		Upper limit	73951.2		Upper limit	1232.52
52	21803	363.383
53	9696	161.6
54	8840	147.333
55	14140	235.667
56	15400	256.667
57	3200	53.3333
58	2340	39
59	3360	56
60	9524	158.733
61	66000	1100
63	18090	301.5
64	6075	101.25
65	4371	72.85
66	690	11.5
67	11264	187.733
68	800	13.3333
69	406	6.76667
70	69900	1165
71	16165	269.417
72	508	8.46667
73	110370	1839.5
74	42000	700
75	930	15.5
76	11616	193.6
77	587010	9783.5
78	8470	141.167
79	0	0
80	8028	133.8
81	8100	135
83	30218	503.633
84	270	4.5
85	2464	41.0667
86	4688	78.1333
87	48330	805.5
88	25920	432
89	34748	579.133
90	17442	290.7
92	17270	287.833
93	18408	306.8
94	3000	50
95	2800	46.6667
96	10272	171.2
98	22220	370.333
99	100200	1670
100	14310	238.5
101	1200	20
102	92092	1534.87
103	1494	24.9
105	1028	17.1333
106	15180	253
107	4146	69.1
108	19710	328.5
111	1950	32.5
112	343980	5733
113	89940	1499
114	4401	73.35
115	1180	19.6667
117	1628	27.1333
119	3090	51.5
120	246248	4104.13
121	200990	3349.83
122	81409972	1.35683e+06
123	4518	75.3
124	37830	630.5
125	2340	39
126	6624	110.4
127	21762	362.7
128	21686	361.433
132	166460	2774.33
133	5534	92.2333
134	2024	33.7333
135	44912	748.533
136	41310	688.5
137	12864	214.4
138	8270	137.833
140	7245	120.75
141	3685	61.4167
142	20710	345.167
143	44650	744.167
144	1368	22.8
145	10665	177.75
146	233709	3895.15
147	3000	50
148	1656	27.6
149	161920	2698.67
150	260	4.33333
151	71400	1190
152	117885	1964.75
153	2208	36.8
154	480	8
Core outcome set trials
Trial ID	Total secondary outcome Time to collect for trial (mins)	Total secondary outcome Time to collect for trial (hours)		Analysis for Core outcome set trials in minutes			Analysis for Core outcome set trials in hours
5	75600	1260
6	2500	41.6667		Min	90		Min	1.5
7	21296	354.933		Q1	2283		Q1	38.05
9	57330	955.5		Median	9475		Median	157.917
11	324	5.4		Q3	21296		Q3	354.933
12	2283	38.05		Max	75600		Max	1260
30	2970	49.5		Mean	19991.8		Mean	333.197
31	20388	339.8		IQR	19013		IQR	316.883
32	45793	763.217		Lower limit	-26236.5		Lower limit	-437.275
33	20650	344.167		Upper limit	49815.5		Upper limit	830.258
34	9475	157.917
35	11616	193.6
36	350	5.83333
37	3000	50
38	90	1.5
39	1876	31.2667
161	64320	1072
Public health trials
Trial ID	Total secondary outcome Time to collect for trial (mins)	Total secondary outcome Time to collect for trial (hours)		Analysis for Public health trials in minutes			Analysis for Public health trials in hours
1	30250	504.167
2	63036	1050.6		Min	546		Min	9.1
3	368640	6144		Q1	7988		Q1	133.133
13	22890	381.5		Median	30250		Median	504.167
15	106196	1769.93		Q3	106196		Q3	1769.93
16	115395	1923.25		Max	451710		Max	7528.5
17	242112	4035.2		Mean	91512		Mean	1525.2
18	19200	320		IQR	98208		IQR	1636.8
19	29835	497.25		Lower limit	-139324		Lower limit	-2322.07
20	4592	76.5333		Upper limit	253508		Upper limit	4225.13
21	48144	802.4
22	3998	66.6333
24	37252	620.867
25	7988	133.133
26	546	9.1
27	3920	65.3333
29	451710	7528.5
All trials
Trial ID	Total secondary outcome Time to collect for trial (mins)	Total secondary outcome Time to collect for trial (hours)		Analysis for all trials in minutes			Analysis for all trials in hours
41	40800	680
42	3154	52.5667		Min	0		Min	0
43	828	13.8		Q1	3000		Q1	50
44	18324	305.4		Median	11440		Median	190.667
45	13875	231.25		Q3	40057.5		Q3	667.625
47	4276	71.2667		Max	81409972		Max	1.35683e+06
48	859299	14321.6		Mean	654967		Mean	10916.1
49	0	0		IQR	37057.5		IQR	617.625
50	17820	297		Lower limit	-52586.2		Lower limit	-876.438
51	4760	79.3333		Upper limit	95643.8		Upper limit	1594.06
52	21803	363.383
53	9696	161.6
54	8840	147.333
55	14140	235.667
56	15400	256.667
57	3200	53.3333
58	2340	39
59	3360	56
60	9524	158.733
61	66000	1100
63	18090	301.5
64	6075	101.25
65	4371	72.85
66	690	11.5
67	11264	187.733
68	800	13.3333
69	406	6.76667
70	69900	1165
71	16165	269.417
72	508	8.46667
73	110370	1839.5
74	42000	700
75	930	15.5
76	11616	193.6
77	587010	9783.5
78	8470	141.167
79	0	0
80	8028	133.8
81	8100	135
83	30218	503.633
84	270	4.5
85	2464	41.0667
86	4688	78.1333
87	48330	805.5
88	25920	432
89	34748	579.133
90	17442	290.7
92	17270	287.833
93	18408	306.8
94	3000	50
95	2800	46.6667
96	10272	171.2
98	22220	370.333
99	100200	1670
100	14310	238.5
101	1200	20
102	92092	1534.87
103	1494	24.9
105	1028	17.1333
106	15180	253
107	4146	69.1
108	19710	328.5
111	1950	32.5
112	343980	5733
113	89940	1499
114	4401	73.35
115	1180	19.6667
117	1628	27.1333
119	3090	51.5
120	246248	4104.13
121	200990	3349.83
122	81409972	1.35683e+06
123	4518	75.3
124	37830	630.5
125	2340	39
126	6624	110.4
127	21762	362.7
128	21686	361.433
132	166460	2774.33
133	5534	92.2333
134	2024	33.7333
135	44912	748.533
136	41310	688.5
137	12864	214.4
138	8270	137.833
140	7245	120.75
141	3685	61.4167
142	20710	345.167
143	44650	744.167
144	1368	22.8
145	10665	177.75
146	233709	3895.15
147	3000	50
148	1656	27.6
149	161920	2698.67
150	260	4.33333
151	71400	1190
152	117885	1964.75
153	2208	36.8
154	480	8
5	75600	1260
6	2500	41.6667
7	21296	354.933
9	57330	955.5
11	324	5.4
12	2283	38.05
30	2970	49.5
31	20388	339.8
32	45793	763.217
33	20650	344.167
34	9475	157.917
35	11616	193.6
36	350	5.83333
37	3000	50
38	90	1.5
39	1876	31.2667
161	64320	1072
1	30250	504.167
2	63036	1050.6
3	368640	6144
13	22890	381.5
15	106196	1769.93
16	115395	1923.25
17	242112	4035.2
18	19200	320
19	29835	497.25
20	4592	76.5333
21	48144	802.4
22	3998	66.6333
24	37252	620.867
25	7988	133.133
26	546	9.1
27	3920	65.3333
29	451710	7528.5

## Sheet: Box Plots
Total secondary outcome Time to collect for trial (mins)
Phase 3 trials	Core outcome set trials	Public health trials
40800	75600	30250
3154	2500	63036
828	21296	368640
18324	57330	22890
13875	324	106196
4276	2283	115395
859299	2970	242112
0	20388	19200
17820	45793	29835
4760	20650	4592
21803	9475	48144
9696	11616	3998
8840	350	37252
14140	3000	7988
15400	90	546
3200	1876	3920
2340	64320	451710
3360
9524
66000
18090
6075
4371
690
11264
800
406
69900
16165
508
110370
42000
930
11616
587010
8470
0
8028
8100
30218
270
2464
4688
48330
25920
34748
17442
17270
18408
3000
2800
10272
22220
100200
14310
1200
92092
1494
1028
15180
4146
19710
1950
343980
89940
4401
1180
1628
3090
246248
200990
81409972
4518
37830
2340
6624
21762
21686
166460
5534
2024
44912
41310
12864
8270
7245
3685
20710
44650
1368
10665
233709
3000
1656
161920
260
71400
117885
2208
480
