# Supplementary material for: A good use of time? Providing evidence for how effort is invested in primary and secondary outcome data collection in trials
Source: Trials. 2022 Dec 27;23:1047. doi: 10.1186/s13063-022-06973-8 (PMC9793601; doi:10.1186/s13063-022-06973-8)
Supplement: Supplementary file 5 — Additional file 5. [file 13063_2022_6973_MOESM5_ESM.xls]

## Sheet: Ratio calc form - Table 1
Trial Forge: cost estimates for Time to collect
Note:	1. These data are based on the 134 trials for which we could obtain full Time to collect data for the trial.
	2. The hourly rate is the February 2022 hourly rate for a UK National Health Service research nurse.
Hourly rate for research nurse time		23.51
All trials
		Primary outcome total Time to collect	Secondary outcomes total Time to collect	Total Time to collect		Time spent on secondaries compared to primary (ratio)			Notional cost of primary outcome collection (£)	Notional cost of secondary outcome collection (£)	Total notional cost of outcome collection (£)
	Median (mins)	3367.5	11440	20457	Median	3.0125		Median	1319.5	4482.57	8015.73
	Min (mins)	0	0	135				Min	0	0	52.8975
	Max (mins)	644800	81409972	81409972				Max	252654	3.18991e+07	3.18991e+07
								Q1	521.334	1175.5	2003.35
	Median (hours)	56.125	190.667	340.95				Q3	5828.42	15504.8	22100
	Min (hours)	0	0	2.25				IQR	5307.09	14329.3	20096.6
	Max (hours)	10746.7	1.35683e+06	1.35683e+06				Lower limit	4525.09	12566.1	17091.6
								Upper limit	14049.7	37586.6	53246.6
Phase 3 trials
Trial ID	Title of trial	Primary outcome total Time to collect (mins)	Secondary outcomes total Time to collect (mins)	Total Time to collect (mins)		Time spent on secondaries compared to primary (ratio)			Notional cost of primary outcome collection (£)	Notional cost of secondary outcome collection (£)	Total notional cost of outcome collection (£)
41	Foldable vs rigid lenses after phacoemulsification for cataract surgery: a randomised controlled trial	3600	40800	44400		11.3333			1410.6	15986.8	17397.4
42	Motivational counseling to reduce sitting time: a community-based randomized controlled trial in adults	9960	3154	13114		0.316667			3902.66	1235.84	5138.5
43	Assessment of the adjuvant effect of tacrolimus in the management of pemphigus vulgaris: A randomized controlled trial	276	828	1104		3			108.146	324.438	432.584
44	Impact of age of first exposure to Plasmodium falciparum on antibody responses to malaria in children: a randomized, controlled trial in Mozambique	3490	18322.5	21812.5		5.25			1367.5	7179.37	8546.86
45	A Cluster Randomized-Controlled Trial of a Classroom-Based Drama Workshop Program to Improve Mental Health Outcomes among Immigrant and Refugee Youth in Special Classes	8325	13875	22200		1.66667			3262.01	5436.69	8698.7
47	Robotic Resistance/Assistance Training Improves Locomotor Function in Individuals Poststroke: A Randomized Controlled Study	1170	4275	5445		3.65385			458.445	1675.09	2133.53
48	Resistance to Erythropoiesis Stimulating Agents in Patients Treated with Online Hemodiafiltration and Ultrapure Low-Flux Hemodialysis: Results from a Randomized Controlled Trial (CONTRAST)	2142	859299	861441		401.167			839.307	336702	337541
49	A Text Message Alcohol Intervention for Young Adult Emergency Department Patients: A Randomized Clinical Trial	91800	0	91800		0			35970.3	0	35970.3
50	Multidisciplinary Group Clinic Appointments: The Self-Management and Care of Heart Failure (SMAC-HF) Trial	990	17820	18810		18			387.915	6982.47	7370.39
51	Platelet-rich plasma injections for the treatment of hamstring injuries: a randomized controlled trial	48440	4760	53200		0.0982659			18980.4	1865.13	20845.5
52	Influence of counseling sessions on the prevalence of breastfeeding in the first year of life: a randomized clinical trial with adolescent mothers and grandmothers	21802.5	21802.5	43605		1			8542.95	8542.95	17085.9
53	Diet and physical exercise in psoriasis: a randomized controlled trial	2727	9696	12423		3.55556			1068.53	3799.22	4867.75
54	Online CBT for preschool anxiety disorders: a randomised control trial	8970	8840	17810		0.985507			3514.75	3463.81	6978.55
55	Family-based psychosocial support and education as part of pulmonary rehabilitation in COPD: a randomized controlled trial	3360	14140	17500		4.20833			1316.56	5540.52	6857.08
56	Increasing varenicline dose in smokers who do not respond to the standard dosage: a randomized clinical trial	3200	15400	18600		4.8125			1253.87	6034.23	7288.1
57	Modafinil increases the latency of response in the Hayling Sentence Completion Test in healthy volunteers: a randomised controlled trial	7680	3200	10880		0.416667			3009.28	1253.87	4263.15
58	A randomized phase III study comparing pegylated liposomal doxorubicin with capecitabine as first-line chemotherapy in elderly patients with metastatic breast cancer: results of the OMEGA study of the Dutch Breast Cancer Research Group BOOG	487.5	2340	2827.5		4.8			191.019	916.89	1107.91
59	Transforaminal versus intra-articular facet corticosteroid injections for the treatment of cervical radiculopathy: a randomized, double-blind, controlled study	504	3360	3864		6.66667			197.484	1316.56	1514.04
60	Simvastatin as a novel therapeutic agent for venous ulcers: a randomized, double-blind, placebo-controlled trial	2842.95	9523.88	12366.8		3.35			1113.96	3731.77	4845.74
61	Prevention of conversion to abnormal TCD with hydroxyurea in sickle cell anemia: a phase III international randomized clinical trial	23100	66000	89100		2.85714			9051.35	25861	34912.4
63	Interactive cognitive-motor step training improves cognitive risk factors of falling in older adults – a randomized controlled trial	1800	18090	19890		10.05			705.3	7088.27	7793.57
64	Tilt table therapies for patients with severe disorders of consciousness: a randomized, controlled trial	3375	6075	9450		1.8			1322.44	2380.39	3702.83
65	Evaluation of sit-stand workstations in an office setting: a randomised controlled trial	5640	4371	10011		0.775			2209.94	1712.7	3922.64
66	Continuous positive airway pressure with helmet versus mask in infants with bronchiolitis: An RCT	90	690	780		7.66667			35.265	270.365	305.63
67	Ultra-low-dose buprenorphine as a time-limited treatment for severe suicidal ideation: A randomized controlled trial	3520	11264	14784		3.2			1379.25	4413.61	5792.86
68	Radiofrequency versus ethanol ablation for treating predominantly cystic thyroid nodules: A randomized clinical trial	3000	800	3800		0.266667			1175.5	313.467	1488.97
69	Folic acid causes higher prevalence of detectable unmetabolized folic acid in serum than B-complex: A randomized clinical trial	406	406	812		1			159.084	159.084	318.169
70	Early intervention and child physical health: Evidence from a Dublin-based randomized controlled trial	58250	69900	128150		1.2			22824.3	27389.2	50213.4
71	Early sustained unresponsiveness after short-course egg oral immunotherapy: a randomized controlled study in egg-allergic children	5490	16165	21655		2.94444			2151.16	6333.99	8485.15
72	Diagnostic performance of the Bernese versus Ottawa ankle rules: Results of a randomised controlled trial	507.5	507.5	1015		1			198.855	198.855	397.711
73	Circuit class therapy or seven-day week therapy for increasing rehabilitation intensity of therapy after stroke (CIRCIT): a randomized controlled trial	9056	110370	119426		12.1875			3548.44	43246.6	46795.1
74	Implementation of a surgical safety checklist and postoperative outcomes: a prospective randomized controlled study	6300	42000	48300		6.66667			2468.55	16457	18925.6
75	Oxybutynin as a treatment for generalized hyperhidrosis: a randomized, placebo-controlled trial	620	930	1550		1.5			242.937	364.405	607.342
76	Benefits of partnered strength training for prostate cancer survivors and spouses: results from a randomized controlled trial of the Exercising Together project	3840	11616	15456		3.025			1504.64	4551.54	6056.18
77	Calcium and vitamin D supplementation do not influence menopause-related symptoms: Results of the Women’s Health Initiative Trial	138120	587010	725130		4.25			54120	230010	284130
78	Resveratrol improves treatment outcome and laboratory parameters in patients with Takayasu arteritis: A randomized double-blind and placebo-controlled trial	16940	8470	25410		0.5			6637.66	3318.83	9956.49
79	Tai Chi Exercise for Cancer-Related Fatigue in Patients With Lung Cancer Undergoing Chemotherapy: A Randomized Controlled Trial	1440	0	1440		0			564.24	0	564.24
80	Comparison of active vs. expectant management of the third stage of labor in women with low risk of postpartum hemorrhage: a randomized controlled trial	2676	8028	10704		3			1048.55	3145.64	4194.18
81	Efficacy of Cognitive-Behavioral Therapy for Insomnia Combined With Antidepressant Pharmacotherapy in Patients With Comorbid Depression and Insomnia: A Randomized Controlled Trial	54000	8100	62100		0.15			21159	3173.85	24332.9
83	Effect of Continuous Positive Airway Pressure on Cardiovascular Biomarkers: The Sleep Apnea Stress Randomized Controlled Trial	2677.5	30217.5	32895		11.2857			1049.13	11840.2	12889.4
84	Is dextrose prolotherapy superior to placebo for the treatment of temporomandibular joint hypermobility? A randomized clinical trial	360	270	630		0.75			141.06	105.795	246.855
85	Should Asymptomatic Bacteriuria Be Systematically Treated in Kidney Transplant Recipients? Results From a Randomized Controlled Trial	336	2464	2800		7.33333			131.656	965.477	1097.13
86	Is there an effect of intranasal insulin on development and behaviour in Phelan-McDermid syndrome? A randomized, double-blind, placebo-controlled trial	9375	4687.5	14062.5		0.5			3673.44	1836.72	5510.16
87	Effects of Housing First on Employment and Income of Homeless Individuals: Results of a Randomized Trial	112770	48330	161100		0.428571			44187	18937.3	63124.4
88	Refeeding low weight hospitalized adolescents with anorexia nervosa: a multicenter randomized controlled trial	3240	25920	29160		8			1269.54	10156.3	11425.9
89	Sustained-release dexamfetamine in the treatment of chronic cocaine-dependent patients on heroin-assisted treatment: a randomised, double-blind, placebo-controlled trial	1752	43508	45260		24.8333			686.492	17047.9	17734.4
90	Immediate versus delayed invasive intervention for non-STEMI patients: The RIDDLE-NSTEMI Study	969	17442	18411		18			379.686	6834.36	7214.04
92	Belotecan/cisplatin versus etoposide/cisplatin in previously untreated patients with extensive-stage small cell lung carcinoma: a multi-center randomized phase III trial	9420	17270	26690		1.83333			3691.07	6766.96	10458
93	Duration of antibiotic treatment in community-acquired pneumonia: A multicenter randomized clinical trial	624	18408	19032		29.5			244.504	7212.87	7457.37
94	Seven-day intensive preoperative rehabilitation for elderly patients with lung cancer: a randomized controlled trial	180	3000	3180		16.6667			70.53	1175.5	1246.03
95	Effect of soy in men with type 2 diabetes mellitus and subclinical hypogonadism: A randomized controlled study	1400	2800	4200		2			548.567	1097.13	1645.7
96	Supported telemonitoring and glycemic control in people with type 2 diabetes: The telescot diabetes pragmatic multicenter randomized controlled trial	3210	10272	13482		3.2			1257.79	4024.91	5282.7
98	Behavioral weight loss intervention for migraine: A randomized controlled trial	27720	22220	49940		0.801587			10861.6	8706.54	19568.2
99	Clinic and home-based behavioral intervention for obesity in pre-schoolers: A randomized trial	1670	100200	101870		60			654.362	39261.7	39916.1
100	Effects of clay art therapy on adults outpatients with major depressive disorder: A randomized controlled trial	4770	14310	19080		3			1869.05	5607.14	7476.18
101	Effectiveness of irrigation with chlorhexidine after removal of mandibular third molars: A randomised controlled trial	2200	1200	3400		0.545455			862.033	470.2	1332.23
102	The effects of multi-disciplinary psycho-social care on socio-economic problems in cancer patients: A cluster-randomized trial	26312	92092	118404		3.5			10309.9	36084.7	46394.6
103	Clinical effects of a pharmacist intervention in acute wards: A randomized controlled trial	29880	1494	31374		0.05			11708	585.399	12293.4
105	Reducing trunk compensation in stroke survivors: A randomized crossover trial comparing visual and force feedback modalities	225	1027.5	1252.5		4.56667			88.1625	402.609	490.771
106	Effect of Erythropoietin in patients with acute myocardial infarction: five-year results of the REVIVAL-3 trial	6210	15180	21390		2.44444			2433.29	5948.03	8381.32
107	Does azithromycin given to women in labour decrease ocular bacterial infection in neonates? A double-blind, randomized trial	4145	4145	8290		1			1624.15	1624.15	3248.3
108	Comparison of 3D laparoscopic gastrectomy with a 2D procedure for gastric cancer: A phase 3 randomized controlled trial	1314	19710	21024		15			514.869	7723.04	8237.9
111	Effect of myofascial techniques for treatment of persistent arm pain after breast cancer treatment: Randomized controlled trial	450	1950	2400		4.33333			176.325	764.075	940.4
112	Multidomain lifestyle intervention benefits a large elderly population at risk for cognitive decline and dementia regardless of baseline characteristics: The FINGER trial	340200	343980	684180		1.01111			133302	134783	268085
113	Mercaptopurine versus placebo to prevent recurrence of Crohn’s disease after surgical resection (TOPPIC): A multicentre, double-blind randomised controlled trial	44640	89940	134580		2.01478			17491.4	35241.5	52732.9
114	Work-focused cognitive behavioural intervention for psychological complaints in patients on sick leave due to work-related stress: Results from a randomized controlled trial	2934	4401	7335		1.5			1149.64	1724.46	2874.1
115	Efficacy of guided self-help behavioural activation and physical acivity for depression: A randomized controlled trial	708	1180	1888		1.66667			277.418	462.363	739.781
117	Acupressure, sleep, and quality of life in institutionalized older adults: A randomized controlled clinical trial	1395	1627.5	3022.5		1.16667			546.608	637.709	1184.32
119	Repetitive TMS to augment cognitive processing therapy in combat veterans of recent conflicts with PTSD: A randomized clinical trial	27810	3090	30900		0.111111			10896.9	1210.77	12107.7
120	Minimally invasive versus abdominal radical hysterectomy for cervical cancer	3943.75	246248	250192		62.44			1545.29	96488.1	98033.4
121	Classroom-based physical activity improves children’s math achievement – A randomized controlled trial	45450	200990	246440		4.42222			17808.8	78754.6	96563.4
122	Effect of a low-intensity PSA-based screening based intervention on prostate cancer mortality: The CAP randomized clinical trial	0	81409972	81409972					0	3.18991e+07	3.18991e+07
123	Prophylaxis of postoperative nausea and vomiting after cardiac surgery in high-risk patients: A randomized controlled study	7530	4518	12048		0.6			2950.51	1770.3	4720.81
124	Effects of long-term norfloxacin therapy in patients with advanced cirrhosis	8730	37830	46560		4.33333			3420.71	14823.1	18243.8
125	Cervical ripening balloon with and without oxytocin in multiparas: A randomized controlled trial	585	2340	2925		4			229.223	916.89	1146.11
126	Self-tracking of physical activity in people with type 2 diabetes	504	6624	7128		13.1429			197.484	2595.5	2792.99
127	An 18-mo randomized, double-blind, placebo-controlled trial of DHA-rich fish oil to prevent age-related cognitive decline in cognitively normal older adults	644800	21762	666562		0.03375			252654	8527.08	261181
128	Effects of a combined physical and psychosocial training for children with cancer: A randomized controlled trial	6195	21682.5	27877.5		3.5			2427.41	8495.93	10923.3
132	Managing risk of non-communicable diseases in women with bulimia nervosa or binge eating disorders: A randomized trial with 12 months follow-up	53300	166460	219760		3.12308			20884.7	65224.6	86109.3
133	Communication-based interventions for increasing influenza vaccination rates among Aboriginal children: A randomised controlled trial	5534	5534	11068		1			2168.41	2168.41	4336.81
134	Garlic extract favourably modifies markers of endothelial function in obese patients – randomized double blind placebo-controlled nutritional intervention	1288	2024	3312		1.57143			504.681	793.071	1297.75
135	Bag-Mask Ventilation during Tracheal Intubation of Critically Ill Adults	1203	44912	46115		37.3333			471.376	17598	18069.4
136	Design of the SHAPE-2 study: the effect of physical activity, in addition to weight loss, on biomarkers of postmenopausal breast cancer risk	2430	41310	43740		17			952.155	16186.6	17138.8
137	Satisfactory analgesia with minimal emesis in day surgeries: a randomised controlled trial of morphine versus hydromorphone	2010	12864	14874		6.4			787.585	5040.54	5828.13
138	Effects of home reading training on reading and quality of life in AMD-a randomized and controlled study	1480	8269.5	9749.5		5.5875			579.913	3240.27	3820.18
140	A randomized trial of trigger point dry needling versus sham needling for chronic tension-type headache	1449	7245	8694		5			567.766	2838.83	3406.6
141	Cost-effectiveness and quality of life of a diet intervention postpartum: 2-year results from a randomized controlled trial	660	3685	4345		5.58333			258.61	1443.91	1702.52
142	Discontinuing cotrimoxazole preventive therapy in HIV-infected adults who are stable on antiretroviral treatment in Uganda (COSTOP): A randomised placebo-controlled trial	13080	20710	33790		1.58333			5125.18	8114.87	13240
143	Goal-oriented cognitive rehabilitation for early-stage Alzheimer's and related dementias: the GREAT RCT	28500	44650	73150		1.56667			11167.2	17495.4	28662.6
144	Lung protective ventilation during pulmonary resection in children: a prospective, single-centre, randomised controlled trial	3420	1368	4788		0.4			1340.07	536.028	1876.1
145	Cuff-assisted versus cap-assisted colonoscopy for adenoma detection: results of a randomized study	2133	10665	12798		5			835.78	4178.9	5014.68
146	Selective laser trabeculoplasty versus drops for newly diagnosed ocular hypertension and glaucoma: the LiGHT RCT	7180	233709	240889		32.55			2813.36	91575	94388.3
147	Inflammatory markers response to citrulline supplementation in patients with non-alcoholic fatty liver disease: a randomized, double blind, placebo-controlled, clinical trial	3500	3000	6500		0.857143			1371.42	1175.5	2546.92
148	Effect of manual physiotherapy in homogeneous individuals with subacromial shoulder impingement: A randomized controlled trial	1380	1656	3036		1.2			540.73	648.876	1189.61
149	Adjuvant Chemotherapy plus Radiation for Locally Advanced Endometrial Cancer	44160	161920	206080		3.66667			17303.4	63445.7	80749
150	Procalcitonin-Guided Treatment on Duration of Antibiotic Therapy and Cost in Septic Patients (PRODA): a Multi-Center Randomized Controlled Trial	52	260	312		5			20.3753	101.877	122.252
151	Levothyroxine in Women with Thyroid Peroxidase Antibodies before Conception	2856	71400	74256		25			1119.08	27976.9	29096
152	Pre-pregnancy and early pregnancy calcium supplementation among women at high risk of pre-eclampsia: a multicentre, double-blind, randomised, placebo-controlled trial	4065	117885	121950		29			1592.8	46191.3	47784.1
153	White Sweet Potato as Meal Replacement for Overweight White-Collar Workers: A Randomized Controlled Trial	360	2208	2568		6.13333			141.06	865.168	1006.23
154	Group singing improves depression and life quality in patients with stable COPD: a randomized community-based trial in China	2040	480	2520		0.235294			799.34	188.08	987.42
	Median (mins)	3225	9984	18110.5	Median	3.12308		Median	1263.66	3912.06	7096.3
	Min (mins)	0	0	312				Min	0	0	122.252
	Max (mins)	644800	81409972	81409972				Max	252654	3.18991e+07	3.18991e+07
								Q1	512.322	1155.91	1832.7
	Median (hours)	53.75	166.4	301.842				Q3	3523.17	12585.9	18414.2
	Min (hours)	0	0	5.2				IQR	3010.85	11430	16581.5
	Max (hours)	10746.7	1.35683e+06	1.35683e+06				Lower limit	2242.36	9696.16	13832.5
								Upper limit	8295.6	30308.9	44202.8
Core outcome set trials
Trial ID	Title of trial	Primary outcome total Time to collect (mins)	Secondary outcomes total Time to collect (mins)	Total Time to collect (mins)		Time spent on secondaries compared to primary (ratio)			Notional cost of primary outcome collection	Notional cost of secondary outcome collection	Total notional cost of outcome collection
5	Direct comparison of treatment responses, remission rates, and drug adherence in patients with rheumatoid arthritis treated with adalimumab, etanercept, or infliximab: results from 8 years of surveillance of clinical practice in the DANBIO registry.	0	75600	75600					0	29622.6	29622.6
6	Effects of Atorvastatin on Disease Activity and HDL Cholesterol Function in Patients With Rheumatoid Arthritis	490	2500	2990		5.10204			191.998	979.583	1171.58
7	A Comparison of Methotrexate Alone or Combined to Infliximab or to Pulse Methylprednisolone in Early Rheumatoid Arthritis: A Magnetic Resonance Imaging Study	5940	21296	27236		3.58519			2327.49	8344.48	10672
9	Treatment of Early RA: Minocycline in Combination With Methotrexate vs Methotrexate Alone	38220	57330	95550		1.5			14975.9	22463.8	37439.7
11	Comparison of MTX+ anti-TNF to MTX+ conventional DMARDs in patients with early rheumatoid arthritis who failed MTX alone	1461	324	1785		0.221766			572.469	126.954	699.423
12	Switching Anti-TNF-Alpha Agents in Rheumatoid Arthritis (RA)	702	2283	2985		3.25214			275.067	894.555	1169.62
30	TNF-blocking Therapy in Combination With Disease-modifying Antirheumatic Drugs in Early Rheumatoid Arthritis (NEO-RACo)	120285	2970	123255		0.0246914			47131.7	1163.75	48295.4
31	Success of Tocilizumab in RA Patients With Remission Induction and Sustained Efficacy After Discontinuation (SURPRISE)	2330	20388	22718		8.75021			912.972	7988.7	8901.67
32	Spacing of TNF-blocker Injections in Rheumatoid Arthritis Study (STRASS)	11097	45793	56890		4.12661			4348.17	17943.2	22291.4
33	Optimal management of rheumatoid arthritis patients requiring biologic therapy (ORBIT)	5900	20650	26550		3.5			2311.82	8091.36	10403.2
34	Effectiveness in daily practice of different treatment strategies for early rheumatoid arthritis	15349.5	9475	24824.5		0.617284			6014.45	3712.62	9727.07
35	Improvement in insulin resistance is greater when infliximab is added to methotrexate during intensive treatment of early rheumatoid arthritis-results from the IDEA study.	1975	11616	13591		5.88152			773.871	4551.54	5325.41
36	Study of Two Different Starting Doses of Methotrexate When Starting Treatment in Rheumatoid Arthritis (DMIRA)	2700	350	3050		0.12963			1057.95	137.142	1195.09
37	Study of Different Doses of Folic Acid in Combination With Methotrexate in Rheumatoid Arthritis (FOLVARI)	2500	3000	5500		1.2			979.583	1175.5	2155.08
38	Leflunomide Versus Sulfasalazine/Methotrexate in Rheumatoid Arthritis:an Ultrasound/Magnetic Resonance Imaging Study	45	90	135		2			17.6325	35.265	52.8975
39	RA Denosumab on bone microstructure study	40	1876	1916		46.9			15.6733	735.079	750.753
161	Combination Treatment With Methotrexate, Cyclosporine, and Intraarticular Betamethasone Compared With Methotrexate and Intraarticular Betamethasone in Early Active Rheumatoid Arthritis Early Active Rheumatoid Arthritis	14400	64320	78720		4.46667			5642.4	25202.7	30845.1
	Median (mins)	2500	9475	22718	Median	3.37607		Median	979.583	3712.62	8901.67
	Min (mins)	0	90	135				Min	0	35.265	52.8975
	Max (mins)	120285	75600	123255				Max	47131.7	29622.6	48295.4
								Q1	275.067	894.555	1171.58
	Median (hours)	41.6667	157.917	378.633				Q3	4348.17	8344.48	22291.4
	Min (hours)	0	1.5	2.25				IQR	4073.11	7449.93	21119.8
	Max (hours)	2004.75	1260	2054.25				Lower limit	3660.51	6108.09	19362.4
								Upper limit	10595.4	19966.7	54556.9
Public health trials
Trial ID	Title of trial	Primary outcome total Time to collect (mins)	Secondary outcomes total Time to collect (mins)	Total Time to collect (mins)		Time spent on secondaries compared to primary (ratio)			Notional cost of primary outcome collection	Notional cost of secondary outcome collection	Total notional cost of outcome collection
1	PRENACEL - a mHealth messaging system to complement antenatal care: a cluster randomized trial	15125	30250	45375		2			5926.48	11853	17779.4
2	Effects of web-based stress and depression literacy intervention on improving symptoms and knowledge of depression among workers: A randomized controlled trial	41715	63036	104751		1.51111			16345.3	24699.6	41044.9
3	Theory-based modifications of an advanced notification letter improves screening for bowel cancer in men: A randomised controlled trial	138240	368640	506880		2.66667			54167	144445	198612
13	A randomized, controlled trial to increase discussion of breast cancer in primary care	16350	22890	39240		1.4			6406.48	8969.07	15375.5
15	Metabolic syndrome from adolescence to early adulthood: effect of infancy-onset dietary counseling of low saturated fat: the Special Turku Coronary Risk Factor Intervention Project (STRIP)	21231.5	106196	127428		5.00181			8319.21	41611.1	49930.3
16	Effectiveness of a group diabetes education programme in under-served communities in South Africa: a pragmatic cluster randomized controlled trial	36110	115395	151505		3.19565			14149.1	45215.6	59364.7
17	Improving feeding and growth of HIV-positive children through nutrition training of frontline health workers in Tanga, Tanzania	363168	242112	605280		0.666667			142301	94867.6	237169
18	Family-centered brief intervention for reducing obesity and cardiovascular disease risk: A randomized controlled trial	48000	19200	67200		0.4			18808	7523.2	26331.2
19	Effectiveness of a walking programme to support adults with intellectual disabilities to increase physical activity: walk well cluster-randomised controlled trial.	3570	29835	33405		8.35714			1398.85	11690.3	13089.2
20	Intervention of childhood and adolescents obesity in Shantou city	410	4592	5002		11.2			160.652	1799.3	1959.95
21	A block randomized controlled trial of a brief smoking cessation counselling and advice through short message service on participants who joined the Quit to Win Contest in Hong Kong	3009	48144	51153		16			1179.03	18864.4	20043.5
22	Brief report: A randomized controlled trial examining peer support and behavioral weight loss treatment	1845	3998	5843		2.16694			722.933	1566.55	2289.48
24	Self-Expansion is Associated with Better Adherence and Obesity Treatment Outcomes in Adults	1072	37252	38324		34.75			420.045	14596.6	15016.6
25	The Effectiveness of a Web-Based Computer-Tailored Intervention on Workplace Sitting: A Randomized Controlled Trial	47925	7988	55913		0.166677			18778.6	3129.96	21908.6
26	Effects of Awareness Material on Suicide-Related Knowledge and the Intention to Provide Adequate Help to Suicidal Individuals	546	546	1092		1			213.941	213.941	427.882
27	A Computerized Lifestyle Application to Promote Multiple Health Behaviors at the Workplace: Testing Its Behavioral and Psychological Effects	21840	3920	25760		0.179487			8557.64	1535.99	10093.6
29	Motivational interviewing and self-determination theory in a web-based computer tailored physical activity intervention: A randomized controlled trial	193590	451710	645300		2.33333			75855	176995	252850
	Median (mins)	21231.5	30250	51153	Median	2.16694		Median	8319.21	11853	20043.5
	Min (mins)	410	546	1092				Min	160.652	213.941	427.882
	Max (mins)	363168	451710	645300				Max	142301	176995	252850
								Q1	1179.03	3129.96	13089.2
	Median (hours)	353.858	504.167	852.55				Q3	18778.6	41611.1	49930.3
	Min (hours)	6.83333	9.1	18.2				IQR	17599.6	38481.2	36841.2
	Max (hours)	6052.8	7528.5	10755				Lower limit	15831	33786.2	17207.4
								Upper limit	45767.5	100898	111737
